# Supplementary material
Source: PubMed Central journal article supplement (PMC5152760)
Supplement: NIHMS834044-supplement-Supporting_Information.pdf [file NIHMS834044-supplement-Supporting_Information.pdf]

# Supporting Information

## A Nucleophilic Strategy for Enantioselective Intermolecular $\alpha$ -Amination: Access to Enantioenriched $\alpha$ -Arylamino Ketones

Dillon H. Miles, Joan Guasch, and F. Dean Toste\*

*Chemical Sciences Division, Lawrence Berkeley National Laboratory, Berkeley, California, 94720 and Department of Chemistry,  
University of California, Berkeley, California, 94720*

### Table of Contents

|                                                                                                                                                       |     |
|-------------------------------------------------------------------------------------------------------------------------------------------------------|-----|
| 1) General Information                                                                                                                                | S2  |
| 2) Synthesis of Arylazoalkene Substrates ( <b>1a-f</b> , <b>1n-p</b> ) and Their Corresponding Precursors ( <b>S1b-S1f</b> , <b>S1p</b> , <b>S2</b> ) | S3  |
| 3) Chiral Phosphoric Acid-Catalyzed Enantioselective Nucleophilic Addition Products ( <b>2a-2p</b> )                                                  | S9  |
| 4) Hydrolysis of products <b>2b</b> , <b>2n</b> , <b>2o</b> to respective ketones <b>4b</b> , <b>4n</b> , <b>4o</b>                                   | S16 |
| 5) References                                                                                                                                         | S18 |
| 6) NMR Spectra                                                                                                                                        | S19 |
| 7) HPLC Traces                                                                                                                                        | S56 |
| 8) Crystal Structure of <b>2g</b>                                                                                                                     | S75 |

## **General Information**

Unless otherwise noted, all reagents were obtained commercially and used without further purification. H-**3a** ((*R*)-TRIP) was prepared according to a published procedure<sup>S1</sup>. H-**3b** was prepared according to a published procedure<sup>S2</sup>. H-**3c** ((*R*)-TCYP) was prepared according to a published procedure<sup>S3</sup>. **3d** ((*R*)-DM-BDPA) was prepared according to a published procedure<sup>S4</sup>. **3e** was prepared according to a published procedure<sup>S5</sup>. Before use in the catalytic reaction, phosphoric acids **3** were dissolved in DCM, shaken with a 6M HCl<sub>(aq)</sub> solution, the layers separated, and the solvent removed under reduced pressure (without use of Na<sub>2</sub>SO<sub>4</sub> or MgSO<sub>4</sub>) to ensure protonation of the phosphate. Molecular sieves were activated under high vacuum at 150 °C for 15 h. Room temperature (r.t.) is defined as 22 °C. Dry and degassed solvents were used for reactions performed under nitrogen.

**Chromatography.** Analytical thin layer chromatography was performed on EMD glass-backed TLC plates (silica gel 60 F254) and visualized by UV lamp (254 nm), anisaldehyde, or potassium permanganate. Column chromatography was performed using Fisher 230-400 mesh, grade 60 silica gel. Purified compounds were further dried under high vacuum.

**Nuclear magnetic resonance spectra.** <sup>1</sup>H and <sup>13</sup>C spectra were recorded on Bruker AVQ-400, or AVB-400 spectrometers. Chemical shifts (δ) are reported in ppm. <sup>1</sup>H NMR spectra are referenced to residual CHCl<sub>3</sub> (7.26 ppm), <sup>13</sup>C NMR spectra are referenced to CDCl<sub>3</sub> (77.16 ppm), and <sup>19</sup>F spectra are referenced to CFC1<sub>3</sub> (0.00 ppm, external). <sup>13</sup>C spectra were recorded with proton decoupling. Peak multiplicities are designated by the following abbreviations: s, singlet; d, doublet; t, triplet; q, quartet; hept, heptet; m, multiplet; br, broad.

**Mass spectrometry.** Mass spectral data were obtained in the QB3/Chemistry Mass Spectrometry Facility, University of California, Berkeley.

**HPLC analyses.** Chiral phase high performance liquid chromatography (HPLC) was performed on Shimadzu VP and Shimadzu prominence series instruments using the specified column (5μm, 4.6 mm x 250 mm). Racemic traces were obtained by substituting 3,3',5,5'-tetra-tert-butyl-[1,1'-biphenyl]-2,2'-diyl hydrogenphosphate<sup>S6</sup> or anhydrous Cu(OTf)<sub>2</sub> in place of the chiral phosphoric acid.

**X-ray crystallography.** Data collection and analysis performed in the X-ray Crystallography Facility, College of Chemistry, University of California, Berkeley.

## Synthesis of Arylazoalkene Substrates (1a-1p) and Their Corresponding Precursors

### (3-Methylbenzyl) isopropyl ketone (**S1b**)

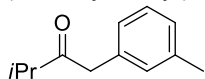

To a flame-dried 250 mL round-bottom flask equipped with a magnetic stir bar was added magnesium (1.52 g, 62.6 mmol) and the flask placed under a nitrogen atmosphere. Ether (anhydrous, degassed) (60 mL) and 3-methylbenzyl chloride (8.44 g, 60.0 mmol) were added and the reaction mixture stirred at r.t. for 1 h. Isobutyronitrile (4.48 mL, 50.0 mmol) was added, the reaction mixture heated to 35 °C, and stirred at this temperature for 16 h. The reaction mixture was quenched by dropwise addition of 6M HCl<sub>(aq)</sub> solution (25 mL), the layers separated, and the aqueous phase extracted with ether (2 x 30 mL). The combined organic phases were washed with NaHCO<sub>3(sat., aq)</sub> and NaCl<sub>(sat., aq)</sub>, dried over MgSO<sub>4</sub>, and concentrated under reduced pressure. The crude product was purified by column chromatography (19:1 hexanes:ether) to afford **S1b** (7.80 g, 88%) as a clear oil; <sup>1</sup>H NMR (400 MHz, CDCl<sub>3</sub>) δ 7.22 (t, *J* = 7.5 Hz, 1H), 7.08 (d, *J* = 7.6 Hz, 1H), 7.03 (s, 1H), 7.01 (d, *J* = 8.1 Hz, 1H), 3.72 (s, 2H), 2.74 (hept, *J* = 6.9 Hz, 1H), 2.35 (s, 3H), 1.11 (d, *J* = 6.9 Hz, 6H); <sup>13</sup>C NMR (101 MHz, CDCl<sub>3</sub>) δ 212.2, 138.3, 134.4, 130.3, 128.6, 127.7, 126.5, 47.8, 40.1, 21.5, 18.4; HRMS (EI): found [M]<sup>+</sup> 176.1196 C<sub>12</sub>H<sub>16</sub>O requires 176.1201

### (2-Methylbenzyl) isopropyl ketone (**S1c**)

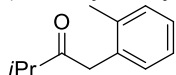

To a 250 mL round-bottom flask equipped with a magnetic stir bar was added ethyl isobutyrate (5.81 g, 50.0 mmol), anhydrous THF (167 mL), and potassium *tert*-butoxide (11.2 g, 100 mmol). *o*-Tolylacetonitrile (6.56 g, 50.0 mmol) was added, the flask capped, and the reaction mixture stirred at r.t. for 15 h. Ethyl acetate (240 mL), water (300 mL), and 12M HCl<sub>(aq)</sub> were added and the layers separated. The organic phase was washed with NaHCO<sub>3(sat., aq)</sub> and NaCl<sub>(sat., aq)</sub>, dried over MgSO<sub>4</sub>, and concentrated under reduced pressure. The crude ketonitrile product was decarboxylated as follows: to a 250 mL round-bottom flask equipped with a magnetic stir bar containing was added the crude ketonitrile product. The flask was cooled to at 0°C and a solution of H<sub>2</sub>SO<sub>4(conc.)</sub> (25 mL) and water (6 mL) was added dropwise. The reaction mixture was heated to 80°C and stirred at this temperature for 30 min. Water (94 mL) was added cautiously. The reaction mixture was heated to 130°C and stirred at this temperature for 4 h at which point it was allowed to cool to r.t. and ether (100 mL) was added. The layers were separated and the organic phase was washed with NaHCO<sub>3(sat., aq)</sub> and NaCl<sub>(sat., aq)</sub>, dried over MgSO<sub>4</sub>, and concentrated under reduced pressure. The crude product was purified by column chromatography (19:1 to 9:1 hexanes:ether) to afford **S1c** (2.93 g, 33%) as a yellow oil; <sup>1</sup>H NMR (400 MHz, CDCl<sub>3</sub>) δ 7.21 – 7.15 (m, 3H), 7.14 – 7.08 (m, 1H), 3.78 (s, 2H), 2.74 (hept, *J* = 6.9 Hz, 1H), 2.24 (s, 3H), 1.13 (d, *J* = 6.9 Hz, 6H); <sup>13</sup>C NMR (101 MHz, CDCl<sub>3</sub>) δ 212.0, 137.0, 133.4, 130.5, 127.3, 126.2, 46.1, 40.0, 19.8, 18.6; HRMS (EI): found [M]<sup>+</sup> 176.1198 C<sub>12</sub>H<sub>16</sub>O requires 176.1201

### (4-Fluorobenzyl) isopropyl ketone (**S1d**)

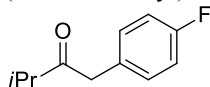

To a flame-dried 100 mL round-bottom flask equipped with a magnetic stir bar was added magnesium (761 mg, 31.3 mmol) and one crystal of iodine (~5 mg) and the flask placed under a nitrogen atmosphere. Ether (anhydrous, degassed) (30 mL) and 4-fluorobenzyl chloride (4.34 g, 30.0 mmol) were added and the reaction mixture stirred at r.t. for 1 h. Isobutyronitrile (2.24 mL, 25.0 mmol) was added, the reaction mixture heated to 35 °C, and stirred at this temperature for 17 h. The reaction mixture was quenched by dropwise addition of 6M HCl<sub>(aq)</sub> solution (25 mL), the layers separated, and the aqueous phase extracted with ether (2 x 30 mL). The combined organic phases were washed with NaHCO<sub>3(sat., aq)</sub> and NaCl<sub>(sat., aq)</sub>, dried over MgSO<sub>4</sub>, and concentrated under reduced pressure. The crude product was purified by column chromatography (19:1 to 9:1 hexanes:ethyl acetate) to afford **S1d** (3.05g, 68%) as a yellow oil; <sup>1</sup>H NMR (400 MHz, CDCl<sub>3</sub>) δ 7.18 – 7.11 (m, 2H), 7.04 – 6.96 (m, 2H), 3.72 (s, 2H), 2.71 (hept, *J* = 7.0 Hz, 1H), 1.11 (d, *J* = 7.0 Hz, 6H); <sup>13</sup>C NMR (101 MHz, CDCl<sub>3</sub>) δ 211.8, 162.0 (d, *J* = 245.0 Hz), 131.1 (d, *J* = 8.0 Hz), 130.2 (d, *J* = 3.3 Hz), 115.5 (d, *J* = 21.3 Hz), 46.7, 40.4, 18.4; <sup>19</sup>F NMR (376 MHz, CDCl<sub>3</sub>) -115.30 – -115.39 (m); HRMS (EI): found [M]<sup>+</sup> 180.0951 C<sub>11</sub>H<sub>13</sub>FO requires 180.095

(4-Chlorobenzyl) isopropyl ketone (**S1e**)

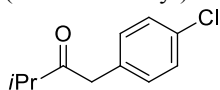

To a flame-dried 250 mL round-bottom flask equipped with a magnetic stir bar was added magnesium (2.13 g, 87.5 mmol) and the flask placed under a nitrogen atmosphere. Ether (anhydrous, degassed) (42 mL) and 4-chlorobenzyl chloride (13.5 g, 84.0 mmol) were added and the reaction mixture stirred at r.t. for 2 h. Isobutyronitrile (2.24 mL, 25.0 mmol) and ether (anhydrous, degassed) (42 mL) was added, the reaction mixture heated to 35 °C, and stirred at this temperature for 15 h. The reaction mixture was quenched by dropwise addition of 6M HCl<sub>(aq)</sub> solution (50 mL), the layers separated, and the aqueous phase extracted with ether (3 x 30 mL). The combined organic phases were washed with NaHCO<sub>3(sat., aq)</sub> and NaCl<sub>(sat., aq)</sub>, dried over MgSO<sub>4</sub>, and concentrated under reduced pressure. The crude product was purified by column chromatography (19:1 to 9:1 hexanes:ether) to afford **S1e** (9.71 g, 70%) as a white solid; <sup>1</sup>H NMR (400 MHz, CDCl<sub>3</sub>) δ 7.28 (d, *J* = 8.5 Hz, 2H), 7.12 (d, *J* = 8.6 Hz, 2H), 3.71 (s, 3H), 2.71 (hept, *J* = 6.9 Hz, 1H), 1.11 (d, *J* = 6.8 Hz, 6H); <sup>13</sup>C NMR (101 MHz, CDCl<sub>3</sub>) δ 211.4, 133.0, 132.9, 130.9, 128.8, 46.8, 40.5, 18.4; HRMS (EI): found [M]<sup>+</sup> 196.0654 C<sub>11</sub>H<sub>13</sub><sup>35</sup>ClO requires 196.0655

(4-Methoxybenzyl) isopropyl ketone (**S1f**)

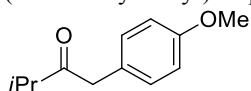

The same procedure for **S1e** was performed, except 4-methoxyphenylacetonitrile (7.36 g, 50 mmol) was used instead. The crude product was purified by column chromatography (9:1 hexanes:ether) to afford **S1f** (3.91 g, 41%) as a colorless oil; <sup>1</sup>H NMR (400 MHz, CDCl<sub>3</sub>) δ 7.11 (d, *J* = 8.7 Hz, 2H), 6.86 (d, *J* = 8.7 Hz, 2H), 3.78 (s, 3H), 3.68 (s, 2H), 2.72 (hept, *J* = 6.8 Hz, 1H), 1.09 (d, *J* = 6.8 Hz, 6H); <sup>13</sup>C NMR (101 MHz, CDCl<sub>3</sub>) δ 212.4, 158.6, 130.5, 126.5, 114.1, 55.3, 46.9, 39.9, 18.4; HRMS (EI): found [M]<sup>+</sup> 192.1149 C<sub>12</sub>H<sub>16</sub>O<sub>2</sub> requires 192.1150

5-(Benzyloxy)-1-phenylpentan-2-one (**S1p**)

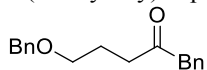

To a 500 mL round-bottom flask equipped with a magnetic stir bar was added 4-(benzyloxy)-*N*-methoxy-*N*-methylbutanamide<sup>S7</sup> (8.39 g, 35.4 mmol) and the flask placed under a nitrogen atmosphere. THF (anhydrous, degassed) (71 mL) was added and the reaction mixture cooled to 0 °C. Benzylmagnesium chloride (26.5 mL, 53 mmol, 2M solution in THF) was added dropwise at this temperature. The reaction mixture was allowed to warm to r.t. and stirred at this temperature for 15 h. The reaction mixture was cooled to 0 °C and NH<sub>4</sub>Cl<sub>(sat., aq)</sub> (50 mL) and water (50 mL) were carefully added. The formed layers were separated and the aqueous layer extracted with ether (2 x 100 mL). The combined organic phases were washed with NaCl<sub>(sat., aq)</sub>, dried over MgSO<sub>4</sub>, and concentrated under reduced pressure. The crude product was purified by column chromatography (9:1 hexanes:ether) to afford **S1p** (6.85 g, 72%) as a clear oil; <sup>1</sup>H NMR (400 MHz, CDCl<sub>3</sub>) δ 7.42 – 7.24 (m, 8H), 7.22 (d, *J* = 6.7 Hz, 2H), 4.47 (s, 2H), 3.71 (s, 2H), 3.47 (t, *J* = 6.1 Hz, 2H), 2.61 (t, *J* = 7.1 Hz, 2H), 1.91 (p, *J* = 7.1, 6.6 Hz, 2H); <sup>13</sup>C NMR (101 MHz, CDCl<sub>3</sub>) δ 208.0, 138.4, 134.4, 129.5, 128.7, 128.4, 127.7, 127.6, 127.0, 72.8, 69.2, 50.2, 38.7, 23.9; HRMS (EI): found [M]<sup>+</sup> 268.1465 C<sub>18</sub>H<sub>20</sub>O<sub>2</sub> requires 268.1463

2-Methyl-4-nitrophenylhydrazine hydrochloride (**S2**)

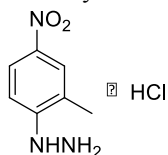

To a 1000 mL round-bottom flask equipped with a magnetic stir bar was added 1-fluoro-2-methyl-4-nitrobenzene (50.0 g, 322 mmol), isopropyl alcohol (488 mL), and hydrazine monohydrate (32.6 mL, 672 mmol). The reaction mixture was then heated to 90 °C and then stirred at this temperature for 2 h. Additional hydrazine monohydrate (32.6 mL, 672 mmol) was added at 90 °C and the reaction mixture stirred at this temperature for an additional 2 h. The reaction mixture was allowed to cool slowly to room temperature at

which point ether (400 mL) was added. The precipitated solid was collected by filtration, washing with water (200 mL) and ether (200 mL). The orange solid was added to a 6M HCl<sub>(aq)</sub> solution (300 mL) and allowed to stir for 1 h, at which point the pale yellow slurry was filtered and dried by pulling vacuum through the solid for 16 h. The solid was dried further under high vacuum over P<sub>2</sub>O<sub>5</sub> for 8 h of afford **S2** (43.3 g, 66%) as a off-white solid; <sup>1</sup>H NMR (400 MHz, DMSO-*d*<sub>6</sub>) δ 10.66 (br s, 1H), 8.92 (br s, 1H), 8.08 (dd, *J* = 9.0, 2.5 Hz, 1H), 8.01 (d, *J* = 2.5 Hz, 1H), 7.05 (d, *J* = 9.0 Hz, 1H), 2.27 (s, 3H); <sup>13</sup>C NMR (101 MHz, DMSO-*d*<sub>6</sub>) δ 149.4, 140.3, 125.4, 124.5, 123.0, 111.3, 39.5, 17.3; HRMS (EI): found [M-HCl]<sup>+</sup> 167.0693 C<sub>7</sub>H<sub>9</sub>N<sub>3</sub>O<sub>2</sub> requires 167.0695

(*E*)-1-((*Z*)-3-Methyl-1-phenylbut-1-en-2-yl)-2-(2-methyl-4-nitrophenyl)diazene (**1a**)

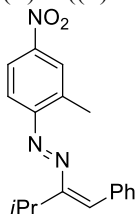

To a 250 mL round-bottom flask equipped with a magnetic stir bar was added benzyl isopropyl ketone (1.62 g, 10.0 mmol), **S2** (2.44 g, 12.0 mmol), anhydrous sodium acetate (8.20 g, 100 mmol), and ethanol (50 mL). The reaction mixture was heated to 60 °C and stirred at this temperature for 14 h. The reaction mixture was cooled, dichloromethane (50 mL) was added, and filtered. The filtrate was concentrated under reduced pressure and passed through a plug of silica (dry load, 9:1 to 4:1 hexanes:ethyl acetate), collecting the first yellow band to afford the crude hydrazone (1.99 g, 6.39 mmol; mixture of both (*E*) and (*Z*) isomers). To a 100 mL round-bottom flask equipped with a magnetic stir bar and containing the crude hydrazone was added pyridine (3.6 mL). The flask was protected from light and a solution of iodine (1.62 g, 6.39 mmol) in pyridine (7.1 mL) was added dropwise to the hydrazone solution. The reaction mixture was then stirred in the absence of light at r.t. for 14 h. The reaction mixture was then cooled to 0 °C and a 1M NaOH<sub>(aq)</sub> solution (19 mL) was added dropwise. After addition, ether (50 mL) and water (50 mL) were added, the mixture was filtered to remove any solids, the filtrate layers were separated, and the aqueous layer extracted with ether (2 x 50 mL). The combined organic phases were washed with 2M HCl<sub>(aq)</sub> (3 x 50 mL), NaHCO<sub>3(sat., aq)</sub>, and NaCl<sub>(sat., aq)</sub>, dried over MgSO<sub>4</sub>, and concentrated under reduced pressure. The crude product was purified by column chromatography (dry load, 19:1 hexanes:ether) and then triturated with methanol (~4 mL) to afford **1a** (281 mg, 9%, two steps) as a dark purple solid; <sup>1</sup>H NMR (400 MHz, CDCl<sub>3</sub>) δ 8.21 (d, *J* = 2.1 Hz, 1H), 8.09 (dd, *J* = 8.8, 2.4 Hz, 1H), 7.73 (d, *J* = 7.2 Hz, 2H), 7.50 (d, *J* = 8.8 Hz, 1H), 7.45 – 7.33 (m, 3H), 7.12 (s, 1H), 3.41 (hept, *J* = 6.8 Hz, 1H), 2.76 (s, 3H), 1.27 (d, *J* = 6.8 Hz, 6H); <sup>13</sup>C NMR (101 MHz, CDCl<sub>3</sub>) δ 160.2, 154.5, 148.2, 139.2, 135.8, 135.2, 132.3, 128.7, 128.3, 126.4, 122.1, 116.5, 27.1, 21.7, 17.9; HRMS (ESI): found [M+H]<sup>+</sup> 310.1550 C<sub>18</sub>H<sub>20</sub>N<sub>3</sub>O<sub>2</sub> requires 310.1550

(*E*)-1-((*Z*)-3-Methyl-1-(*m*-tolyl)but-1-en-2-yl)-2-(2-methyl-4-nitrophenyl)diazene (**1b**)

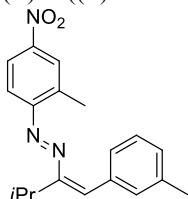

The same procedure for **1a** was performed, except (3-Methylbenzyl) isopropyl ketone (**S1b**) (3.08 g, 17.5 mmol) was used instead. The reaction afforded **1b** (727 mg, 13%, two steps) as a dark purple solid; <sup>1</sup>H NMR (400 MHz, CDCl<sub>3</sub>) δ 8.22 (d, *J* = 2.3 Hz, 1H), 8.10 (dd, *J* = 8.8, 2.5 Hz, 1H), 7.58 – 7.46 (m, 3H), 7.31 (t, *J* = 8.0 Hz, 1H), 7.19 (d, *J* = 7.6 Hz, 1H), 7.10 (s, 1H), 3.41 (hept, *J* = 6.9 Hz, 1H), 2.76 (s, 3H), 2.40 (s, 3H), 1.26 (d, *J* = 6.9 Hz, 6H); <sup>13</sup>C NMR (101 MHz, CDCl<sub>3</sub>) δ 160.2, 154.5, 148.2, 139.2, 137.8, 135.8, 135.4, 133.1, 129.5, 129.5, 128.2, 126.4, 122.1, 116.5, 27.1, 21.7, 21.6, 17.9; HRMS (ESI): found [M+H]<sup>+</sup> 324.1707 C<sub>19</sub>H<sub>22</sub>N<sub>3</sub>O<sub>2</sub> requires 324.1707

(*E*)-1-((*Z*)-3-methyl-1-(*o*-tolyl)but-1-en-2-yl)-2-(2-methyl-4-nitrophenyl)diazene (**1c**)

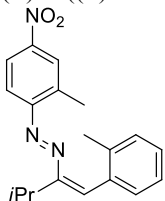

The same procedure for **1a** was performed, except (2-Methylbenzyl) isopropyl ketone (**S1c**) (2.64g, 15.0 mmol) was used instead. The reaction afforded **1c** (449 mg, 9%, two steps) as a dark purple solid; **<sup>1</sup>H NMR** (400 MHz, CDCl<sub>3</sub>) δ 8.20 (d, *J* = 2.5 Hz, 1H), 8.03 (dd, *J* = 8.8, 2.5 Hz, 1H), 7.49 (d, *J* = 7.6 Hz, 1H), 7.41 (d, *J* = 8.8 Hz, 1H), 7.37 (s, 1H), 7.32 – 7.20 (m, H), 3.42 (hept, *J* = 7.0 Hz, 1H), 2.76 (s, 3H), 2.45 (s, 3H), 1.30 (d, *J* = 6.8 Hz, 6H); **<sup>13</sup>C NMR** (101 MHz, CDCl<sub>3</sub>) δ 160.3, 154.3, 148.2, 139.2, 137.2, 134.6, 134.1, 133.5, 130.0, 128.6, 126.4, 125.3, 122.0, 116.5, 27.2, 21.8, 20.5, 17.8; **HRMS** (ESI): found [M+H]<sup>+</sup> 324.1707 C<sub>19</sub>H<sub>22</sub>N<sub>3</sub>O<sub>2</sub> requires 324.1707

(*E*)-1-((*Z*)-1-(4-fluorophenyl)-3-methylbut-1-en-2-yl)-2-(2-methyl-4-nitrophenyl)diazene (**1d**)

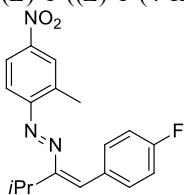

The same procedure for **1a** was performed, except (4-Fluorobenzyl) isopropyl ketone (**S1d**) (3.00g, 16.6 mmol) was used instead. The reaction afforded **1d** (480 mg, 9%, two steps) as a dark purple solid; **<sup>1</sup>H NMR** (400 MHz, CDCl<sub>3</sub>) δ 8.21 (d, *J* = 2.4 Hz, 1H), 8.09 (dd, *J* = 8.8, 2.1 Hz, 1H), 7.71 (dd, *J* = 8.6, 5.6 Hz, 2H), 7.45 (d, *J* = 8.8 Hz, 1H), 7.09 (t, *J* = 8.8 Hz, 2H), 7.06 (s, 1H), 3.38 (hept, *J* = 6.8 Hz, 1H), 2.74 (s, 3H), 1.24 (d, *J* = 6.8 Hz, 6H); **<sup>13</sup>C NMR** (101 MHz, CDCl<sub>3</sub>) δ 163.1 (d, *J* = 250.5 Hz), 160.0, 154.5, 148.3, 139.2, 134.1 (d, *J* = 8.1 Hz), 134.0, 132.1 (d, *J* = 3.5 Hz), 126.5, 122.2, 116.4, 115.4 (d, *J* = 21.6 Hz), 27.1, 21.7, 17.9; **<sup>19</sup>F NMR** (376 MHz, CDCl<sub>3</sub>) δ -111.18 – -111.28 (m); **HRMS** (ESI): found [M+H]<sup>+</sup> 328.1456 C<sub>18</sub>H<sub>19</sub>FN<sub>3</sub>O<sub>2</sub> requires 328.1456

(*E*)-1-((*Z*)-1-(4-chlorophenyl)-3-methylbut-1-en-2-yl)-2-(2-methyl-4-nitrophenyl)diazene (**1e**)

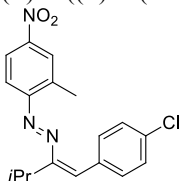

The same procedure for **1a** was performed, except (4-Chlorobenzyl) isopropyl ketone (**S1e**) (3.44g, 17.5 mmol) was used instead. The reaction afforded **1e** (1.20 g, 20%, two steps) as a dark purple solid; **<sup>1</sup>H NMR** (400 MHz, CDCl<sub>3</sub>) δ 8.21 (d, *J* = 2.4 Hz, 1H), 8.09 (dd, *J* = 8.8, 2.5 Hz, 1H), 7.64 (d, *J* = 8.6 Hz, 2H), 7.45 (d, *J* = 8.8 Hz, 1H), 7.36 (d, *J* = 8.6 Hz, 2H), 7.04 (s, 1H), 3.38 (hept, *J* = 6.9 Hz, 1H), 2.75 (s, 3H), 1.24 (d, *J* = 6.9 Hz, 6H); **<sup>13</sup>C NMR** (101 MHz, CDCl<sub>3</sub>) δ 160.6, 154.4, 148.4, 139.4, 134.8, 134.3, 133.8, 133.4, 128.5, 126.5, 122.2, 116.4, 27.1, 21.6, 17.9; **HRMS** (ESI): found [M+H]<sup>+</sup> 344.1159 C<sub>18</sub>H<sub>19</sub><sup>35</sup>ClN<sub>3</sub>O<sub>2</sub> requires 344.1160

(*E*)-1-((*Z*)-1-(4-methoxyphenyl)-3-methylbut-1-en-2-yl)-2-(2-methyl-4-nitrophenyl)diazene (**1f**)

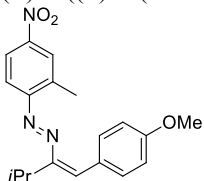

The same procedure for **1a** was performed, except (4-Methoxybenzyl) isopropyl ketone (**S1f**) (2.31g, 12.0 mmol) was used instead. The reaction afforded **1f** (1.20 g, 23%, two steps) as a black solid; **<sup>1</sup>H NMR** (400 MHz, CDCl<sub>3</sub>) δ 8.20 (d, *J* = 2.0 Hz, 1H), 8.10 (dd, *J* = 8.8, 2.3 Hz, 1H), 7.72 (d, *J* = 8.8 Hz, 2H), 7.50 (d, *J* = 8.8 Hz, 1H), 7.04 (s, 1H), 6.94 (d, *J* = 8.8 Hz, 2H), 3.86 (s, 3H), 3.39 (hept, *J*

= 7.2 Hz, 1H), 2.74 (s, 3H), 1.24 (d,  $J = 6.8$  Hz, 6H);  $^{13}\text{C}$  NMR (101 MHz,  $\text{CDCl}_3$ )  $\delta$  160.4, 159.1, 154.8, 148.0, 138.9, 135.2, 134.1, 128.7, 126.4, 122.2, 116.5, 114.0, 55.4, 27.1, 21.7, 17.9; HRMS (ESI): found  $[\text{M}+\text{H}]^+$  340.1654  $\text{C}_{19}\text{H}_{22}\text{N}_3\text{O}_3$  requires 340.1656

#### NOE experiments:

The diastereomeric assignment of **1f** (and by analogy **1a-1e**) was performed by irradiation of  $\text{H}_a$  and  $\text{H}_c$ , which gave the following relevant enhancements. Additionally, although a negative observation, no communication between  $\text{H}_b$  and  $\text{H}_d/\text{H}_e$  was observed.

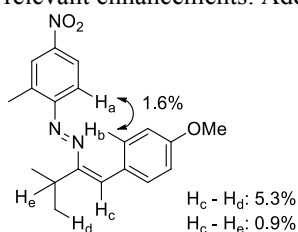

#### (*E*)-1-(cyclohex-1-en-1-yl)-2-(4-nitrophenyl)diazene (**1n**)

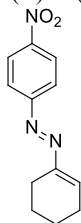

Adapted from a published procedure<sup>58</sup>. To a 50 mL round bottom flask with a magnetic stir bar was added 2-chlorocyclohexanone (1.33 g, 10.0 mmol) and pyridine (1.01 mL, 12.5 mmol). The reaction mixture was heated to 100 °C (pre-heated oil bath) and stirred at this temperature for 5 min. The reaction mixture was cooled and THF (2 mL) was added to obtain solution **A**. In a separate 250 mL round bottom flask with a magnetic stir bar was added 4-nitrophenyl hydrazine and THF (10 mL). The reaction mixture was cooled to 0 °C and solution **A** was added dropwise. After addition, the reaction mixture was stirred at 0 °C for 2 h at which point ice water (140 mL) was added. A 1M  $\text{NaOH}_{(\text{aq})}$  solution (16 mL) was then added dropwise and The reaction mixture extracted with DCM (3 x 50 mL). The combined organic phases were washed with  $\text{NaCl}_{(\text{sat., aq})}$ , dried over  $\text{Na}_2\text{SO}_4$ , and concentrated under reduced pressure. The crude product was purified by column chromatography (19:1 hexanes:ethyl acetate) to afford **1n** (1.63 g, 71%) as a orange solid;  $^1\text{H}$  NMR (400 MHz,  $\text{CDCl}_3$ )  $\delta$  8.29 (d,  $J = 9.0$  Hz, 2H), 7.82 (d,  $J = 9.0$  Hz, 2H), 7.13 (t,  $J = 4.4$  Hz, 1H), 2.57 – 2.47 (m, 2H), 2.45 – 2.36 (m, 2H), 1.83 – 1.69 (m, 4H);  $^{13}\text{C}$  NMR (101 MHz,  $\text{CDCl}_3$ )  $\delta$  156.29, 156.25, 148.1, 146.5, 124.7, 123.0, 26.9, 22.8, 22.2, 21.9; HRMS (EI): found  $[\text{M}]^+$  231.1008  $\text{C}_{12}\text{H}_{13}\text{N}_3\text{O}_2$  requires 231.1008

#### (*E*)-1-(2-methyl-4-nitrophenyl)-2-((*E*)-1-(*p*-tolyl)prop-1-en-2-yl)diazene (**1o<sub>E</sub>**)

#### (*E*)-1-(2-methyl-4-nitrophenyl)-2-((*Z*)-1-(*p*-tolyl)prop-1-en-2-yl)diazene (**1o<sub>Z</sub>**)

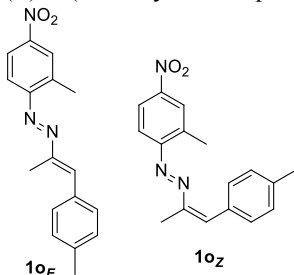

The same procedure for **1a** was performed, except 4-Methylphenylacetone (1.48 g, 10.0 mmol) was used instead. The reaction afforded **1o** (400 mg, 14%, two steps) as a red solid (2:1 **1o<sub>E</sub>**:**1o<sub>Z</sub>**);  $^1\text{H}$  NMR (400 MHz,  $\text{CDCl}_3$ )  $\delta$  (**1o<sub>E</sub>**) 8.20 (d,  $J = 2.7$  Hz, 1H), 8.10 (dd,  $J = 8.8, 2.2$  Hz, 1H), 7.79 (s, 1H), 7.63 (d,  $J = 8.8$  Hz, 1H), 7.51 (d,  $J = 7.7$  Hz, 2H), 7.29 (d,  $J = 8.1$  Hz, 2H), 2.72 (s, 3H), 2.43 (s, 3H), 2.31 (s, 3H);  $\delta$  (**1o<sub>Z</sub>**) 8.20 (d,  $J = 3.4$  Hz, 1H), 8.10 (dd,  $J = 8.8, 2.2$  Hz, 1H), 7.68 (d,  $J = 8.1$  Hz, 2H), 7.53 (d,  $J = 8.2$  Hz, 1H), 7.22 (d,  $J = 8.1$  Hz, 2H), 7.13 (s, 1H), 2.73 (s, 3H), 2.40 (s, 3H), 2.17 (s, 3H);  $^{13}\text{C}$  NMR (101 MHz,  $\text{CDCl}_3$ )  $\delta$  (**1o<sub>E</sub>**+**1o<sub>Z</sub>**) 154.6, 154.2,

154.1, 151.0, 148.1, 147.9, 146.1, 139.6, 139.2, 139.1, 138.6, 138.3, 132.9, 132.9, 132.3, 130.2, 129.5, 129.2, 126.3, 126.3, 122.0, 122.0, 116.6, 116.3, 21.5, 21.5, 17.9, 17.7, 17.7, 12.1; **HRMS** (ESI): found  $[M+H]^+$  296.1395  $C_{17}H_{18}N_3O_2$  requires 296.1394

### NOE experiments:

The diastereomeric assignment of **1o<sub>E</sub>** and **1o<sub>Z</sub>** was performed by irradiation of H<sub>a</sub>, H<sub>b</sub>, H<sub>d</sub>, and H<sub>e</sub> which gave the following relevant enhancements. Additionally, although a negative observation, no communication between H<sub>a</sub> and H<sub>b</sub> was observed.

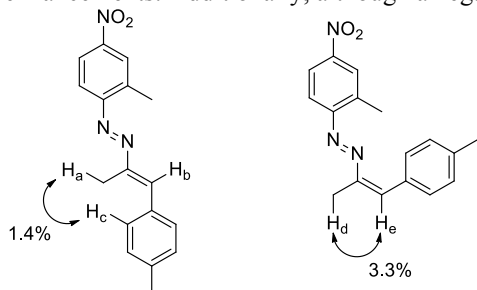

(*E*)-1-((*E*)-5-(Benzyloxy)-1-phenylpent-1-en-2-yl)-2-(2-methyl-4-nitrophenyl)diazene (**1p**)

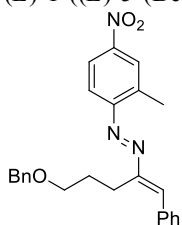

The same procedure for **1a** was performed, except (5-(benzyloxy)-1-phenylpentan-2-one (**S1p**) (2.68 g, 10.0 mmol) was used instead. The crude product was purified by column chromatography (dry load, 19:1 hexanes:ether, first orange band) to afford **1p** (274 mg, 7%, two steps) as a red solid;  $^1H$  NMR (400 MHz,  $CDCl_3$ )  $\delta$  8.20 (d,  $J$  = 2.1 Hz, 1H), 8.11 (dd,  $J$  = 8.8, 2.5 Hz, 1H), 7.81 (s, 1H), 7.69 (d,  $J$  = 6.3 Hz, 2H), 7.64 (d,  $J$  = 8.8 Hz, 1H), 7.47 – 7.30 (m, 8H), 4.55 (s, 2H), 3.62 (t,  $J$  = 6.1 Hz, 2H), 3.03 – 2.95 (m, 2H), 2.70 (s, 3H), 2.00 – 1.90 (m, 2H);  $^{13}C$  NMR (101 MHz,  $CDCl_3$ )  $\delta$  157.9, 154.1, 148.1, 146.3, 138.6, 138.4, 135.4, 130.1, 129.3, 128.9, 128.4, 127.6, 127.5, 126.3, 122.0, 116.2, 73.0, 70.2, 27.7, 22.4, 17.8.; **HRMS** (EI): found  $[M+H]^+$  415.1894  $C_{25}H_{25}N_3O_3$  requires 415.1896

### NOE experiments:

The diastereomeric assignment of **1p** was performed by irradiation of a mixture of **1p** and iso-**1p**. H<sub>a</sub> showed no enhancement upon irradiation of H<sub>b</sub>, while H<sub>c</sub> showed an enhancement of 4.1% upon irradiation of H<sub>d</sub>.

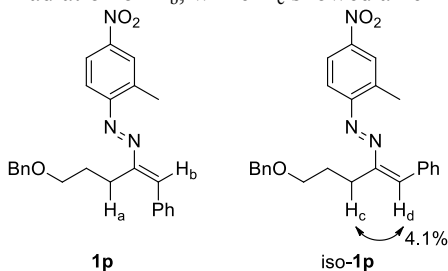



## Chiral Phosphoric Acid-Catalyzed Enantioselective Nucleophilic Addition Products

General procedure **A** for the addition reaction (substrates **2a-2m**): To a 1 dram (3.7 mL) glass vial equipped with a magnetic stir bar was added the appropriate arylazoalkene **1** (0.30 mmol), (*R*)-TCYP (**H-3c**) (9.9 mg, 0.010 mmol), and 5A molecular sieves (100 mg). A solution of the appropriate aniline (0.10 mmol) in benzene (1 mL) was added, the vial capped with a PTFE screw cap, protected from ambient light, and stirred at r.t. for the designated time. The reaction mixture was loaded directly onto the column and purified by column chromatography to obtain the desired product.

(*S,E*)-2-Methoxy-*N*-(3-methyl-2-(2-(2-methyl-4-nitrophenyl)hydrazono)-1-phenylbutyl)aniline (**2a**)

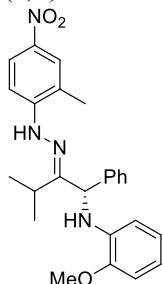

General procedure **A** using arylazoalkene **1a** (92.8 mg, 0.30 mmol) and 2-methoxyaniline (12.3 mg, 0.10 mmol) with a reaction time of 24 h after column chromatography (4:1 to 3:1 hexanes:ether) afforded **2a** (39.7 mg, 92%) as a yellow film;  $^1\text{H NMR}$  (400 MHz,  $\text{CDCl}_3$ )  $\delta$  8.14 (dd,  $J = 9.0, 2.6$  Hz, 1H), 8.03 (d,  $J = 1.9$  Hz, 1H), 7.74 (br s, 1H), 7.55 (d,  $J = 9.1$  Hz, 1H), 7.49 (d,  $J = 7.1$  Hz, 2H), 7.35 (t,  $J = 7.5$  Hz, 2H), 7.32 – 7.23 (m, 1H), 6.83 – 6.73 (m, 2H), 6.70 – 6.59 (m, 2H), 5.93 (br s, 1H), 5.21 (s, 1H), 3.94 (s, 3H), 2.88 (hept,  $J = 7.1$  Hz, 1H), 2.25 (s, 3H), 1.21 (d,  $J = 7.1$  Hz, 3H), 1.07 (d,  $J = 7.2$  Hz, 3H);  $^{13}\text{C NMR}$  (101 MHz,  $\text{CDCl}_3$ )  $\delta$  155.2, 148.3, 147.2, 140.4, 139.9, 136.8, 128.8, 128.2, 127.9, 126.4, 124.3, 121.2, 119.8, 117.1, 111.4, 111.0, 109.7, 60.7, 55.8, 28.7, 18.6, 18.6, 17.0; **HRMS** (ESI): found  $[\text{M}+\text{H}]^+$  443.2236  $\text{C}_{25}\text{H}_{29}\text{N}_4\text{O}_3$  requires 433.2234; **HPLC** Chiralpak AD-H column (80:20 hexanes:isopropanol, 1.0 mL/min, 356 nm); major enantiomer  $t_r = 15.17$  min, minor enantiomer  $t_r = 13.46$  min, 92% ee; absolute configuration assigned as (*S*) by analogy to **2g**.

(*S,E*)-2-Methoxy-*N*-(3-methyl-2-(2-(2-methyl-4-nitrophenyl)hydrazono)-1-(*m*-tolyl)butyl)aniline (**2b**)

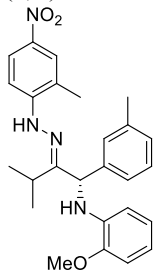

General procedure **A** using arylazoalkene **1b** (97.0 mg, 0.30 mmol) and 2-methoxyaniline (12.3 mg, 0.10 mmol) with a reaction time of 24 h after column chromatography (4:1 to 3:1 hexanes:ether) afforded **2b** (38.9 mg, 87%) as a yellow foam;  $^1\text{H NMR}$  (400 MHz,  $\text{CDCl}_3$ )  $\delta$  8.14 (dd,  $J = 9.0, 2.6$  Hz, 1H), 8.03 (d,  $J = 1.9$  Hz, 1H), 7.74 (s, 1H), 7.55 (d,  $J = 9.1$  Hz, 1H), 7.49 (d,  $J = 7.1$  Hz, 2H), 7.35 (t,  $J = 7.5$  Hz, 2H), 7.32 – 7.23 (m, 1H), 6.83 – 6.73 (m, 2H), 6.70 – 6.59 (m, 2H), 5.93 (br s, 1H), 5.21 (s, 1H), 3.94 (s, 3H), 2.88 (hept,  $J = 7.1$  Hz, 1H), 2.25 (s, 3H), 1.21 (d,  $J = 7.1$  Hz, 3H), 1.07 (d,  $J = 7.2$  Hz, 3H);  $^{13}\text{C NMR}$  (101 MHz,  $\text{CDCl}_3$ )  $\delta$  155.2, 148.4, 147.2, 140.2, 139.8, 138.4, 136.9, 128.8, 128.7, 128.6, 126.4, 125.3, 124.3, 121.2, 119.8, 117.0, 111.3, 111.0, 109.6, 60.8, 55.7, 28.7, 21.6, 18.6, 18.6, 17.0; **HRMS** (ESI): found  $[\text{M}+\text{H}]^+$  447.2394  $\text{C}_{26}\text{H}_{31}\text{N}_4\text{O}_3$  requires 447.2391; **HPLC** Chiralpak AD-H column (80:20 hexanes:isopropanol, 1.0 mL/min, 356 nm); major enantiomer  $t_r = 11.83$  min, minor enantiomer  $t_r = 9.58$  min, 93% ee; absolute configuration assigned as (*S*) by analogy to **2g**.

(*S,E*)-2-Methoxy-*N*-(3-methyl-2-(2-(2-methyl-4-nitrophenyl)hydrazono)-1-(*o*-tolyl)butyl)aniline (**2c**)

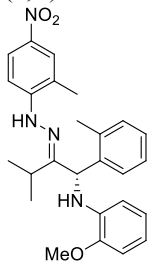

General procedure **A** using arylazoalkene **1c** (97.0 mg, 0.30 mmol) and 2-methoxyaniline (12.3 mg, 0.10 mmol) with a reaction time of 24 h after column chromatography (4:1 to 3:1 hexanes:ether) afforded **2c** (39.8 mg, 89%) as a yellow foam;  $^1\text{H NMR}$  (400 MHz,  $\text{CDCl}_3$ )  $\delta$  8.07 – 7.98 (m, 2H), 7.75 (s, 1H), 7.41 – 7.35 (m, 1H), 7.30 (d,  $J = 9.0$  Hz, 1H), 7.25 – 7.18 (m, 3H), 6.84 – 6.77 (m, 2H), 6.72 – 6.60 (m, 2H), 5.51 (s, 1H), 5.34 (br s, 1H), 3.93 (s, 3H), 2.87 (hept,  $J = 7.3$  Hz, 1H), 2.52 (s, 3H), 2.24 (s, 3H), 1.25 (d,  $J = 7.1$  Hz, 3H), 1.11 (d,  $J = 7.1$  Hz, 3H);  $^{13}\text{C NMR}$  (101 MHz,  $\text{CDCl}_3$ )  $\delta$  154.7, 148.4, 147.4, 139.7, 137.9, 137.4, 136.5, 131.1, 127.9, 127.7, 126.3, 126.3, 124.2, 121.2, 119.6, 117.4, 111.3, 111.0, 109.7, 57.5, 55.6, 28.5, 19.5, 18.7, 18.5, 17.0; **HRMS** (ESI): found  $[\text{M}+\text{H}]^+$  447.2393  $\text{C}_{26}\text{H}_{31}\text{N}_4\text{O}_3$  requires 447.2391; **HPLC** Chiralpak AD-H column (80:20 hexanes:isopropanol, 1.0 mL/min, 356 nm); major enantiomer  $t_r = 7.07$  min, minor enantiomer  $t_r = 5.54$  min, 94% ee; absolute configuration assigned as (*S*) by analogy to **2g**.

(*S,E*)-*N*-(1-(4-Fluorophenyl)-3-methyl-2-(2-(2-methyl-4-nitrophenyl)hydrazono)butyl)-2-methoxyaniline (**2d**)

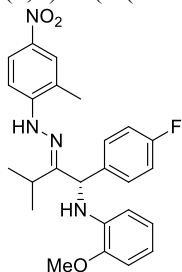

General procedure **A** using arylazoalkene **1d** (98.2 mg, 0.30 mmol) and 2-methoxyaniline (12.3 mg, 0.10 mmol) with a reaction time of 24 h after column chromatography (4:1 to 2:1 hexanes:ether) afforded **2d** (41.8 mg, 93%) as a yellow foam;  $^1\text{H NMR}$  (400 MHz,  $\text{CDCl}_3$ )  $\delta$  8.13 (dd,  $J = 9.0, 2.6$  Hz, 1H), 8.04 (d,  $J = 2.0$  Hz, 1H), 7.73 (s, 1H), 7.52 (d,  $J = 9.0$  Hz, 1H), 7.45 (dd,  $J = 8.6, 5.3$  Hz, 2H), 7.04 (t,  $J = 8.6$  Hz, 2H), 6.83 – 6.73 (m, 2H), 6.69 – 6.63 (m, 1H), 6.56 (d,  $J = 7.8$  Hz, 1H), 5.93 (br s, 1H), 5.19 (s, 1H), 3.93 (s, 3H), 2.86 (hept,  $J = 7.6$  Hz, 1H), 2.26 (s, 3H), 1.21 (d,  $J = 7.1$  Hz, 3H), 1.08 (d,  $J = 7.2$  Hz, 3H);  $^{13}\text{C NMR}$  (101 MHz,  $\text{CDCl}_3$ )  $\delta$  162.3 (d,  $J = 246.4$  Hz), 154.9, 148.2, 147.2, 139.9, 136.6, 136.3 (d,  $J = 3.1$  Hz), 129.7 (d,  $J = 8.1$  Hz), 126.4, 124.3, 121.2, 119.9, 117.2, 115.7 (d,  $J = 21.6$  Hz), 111.3, 110.8, 109.7, 59.7, 55.7, 28.7, 18.6, 18.6, 17.0;  $^{19}\text{F NMR}$  (376 MHz,  $\text{CDCl}_3$ )  $\delta$  -113.66 – -113.75 (m); **HRMS** (ESI): found  $[\text{M}+\text{H}]^+$  451.2142  $\text{C}_{25}\text{H}_{28}\text{FN}_4\text{O}_3$  requires 451.2140; **HPLC** Chiralpak AD-H column (80:20 hexanes:isopropanol, 1.0 mL/min, 356 nm); major enantiomer  $t_r = 11.72$  min, minor enantiomer  $t_r = 15.62$  min, 91% ee; absolute configuration assigned as (*S*) by analogy to **2g**.

(*S,E*)-*N*-(1-(4-Chlorophenyl)-3-methyl-2-(2-(2-methyl-4-nitrophenyl)hydrazono)butyl)-2-methoxyaniline (**2e**)

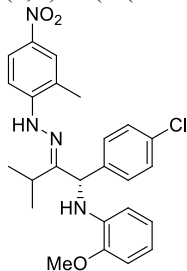

General procedure **A** using arylazoalkene **1e** (103 mg, 0.30 mmol) and 2-methoxyaniline (12.3 mg, 0.10 mmol) with a reaction time of 24 h after column chromatography (4:1 to 2:1 hexanes:ether) afforded **2e** (38.9 mg, 87%) as a yellow film;  $^1\text{H NMR}$  (400 MHz,  $\text{CDCl}_3$ )  $\delta$  8.14 (dd,  $J = 9.1, 2.5$  Hz, 1H), 8.03 (d,  $J = 2.0$  Hz, 1H), 7.74 (s, 1H), 7.52 (d,  $J = 9.1$  Hz, 1H), 7.43 (d,  $J = 8.5$  Hz, 2H), 7.32

(d,  $J = 8.5$  Hz, 2H), 6.83 – 6.73 (m, 2H), 6.67 (td,  $J = 7.7, 1.5$  Hz, 1H), 6.58 – 6.51 (m, 1H), 5.92 (br s, 1H), 5.19 (s, 1H), 3.94 (s, 3H), 2.88 (hept,  $J = 6.8$  Hz, 1H), 2.26 (s, 3H), 1.22 (d,  $J = 7.1$  Hz, 3H), 1.10 (d,  $J = 7.2$  Hz, 3H);  $^{13}\text{C}$  NMR (101 MHz,  $\text{CDCl}_3$ )  $\delta$  154.6, 148.1, 147.2, 140.0, 139.1, 136.4, 133.6, 129.5, 128.9, 126.5, 124.3, 121.2, 119.9, 117.4, 111.3, 110.9, 109.7, 59.8, 55.8, 28.7, 18.7, 18.6, 17.0; **HRMS** (ESI): found  $[\text{M}+\text{H}]^+$  467.1850  $\text{C}_{25}\text{H}_{28}^{35}\text{ClN}_4\text{O}_3$  requires 467.1844; **HPLC** Chiralpak AD-H column (80:20 hexanes:isopropanol, 1.0 mL/min, 356 nm); major enantiomer  $t_r = 10.39$  min, minor enantiomer  $t_r = 15.78$  min, 93% ee; absolute configuration assigned as (*S*) by analogy to **2g**.

(*S,E*)-2-Methoxy-*N*-(1-(4-methoxyphenyl)-3-methyl-2-(2-(2-methyl-4-nitrophenyl)hydrazono)butyl)aniline (**2f**)

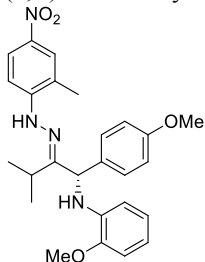

General procedure **A** using arylazoalkene **1f** (102 mg, 0.30 mmol) and 2-methoxyaniline (12.3 mg, 0.10 mmol) with a reaction time of 1.5 h after column chromatography (3:1 to 2:1 hexanes:ether) afforded **2e** (42.4 mg, 92%) as a yellow foam;  $^1\text{H}$  NMR (400 MHz,  $\text{CDCl}_3$ )  $\delta$  8.14 (dd,  $J = 9.2, 2.6$  Hz, 1H), 8.03 (d,  $J = 2.4$  Hz, 1H), 7.74 (s, 1H), 7.56 (d,  $J = 9.1$  Hz, 1H), 7.40 (d,  $J = 8.6$  Hz, 2H), 6.88 (d,  $J = 8.7$  Hz, 2H), 6.78 (t,  $J = 7.5$  Hz, 2H), 6.69 – 5.97 (m, 2H), 6.00 (s, 1H), 5.17 (s, 1H), 3.93 (s, 3H), 3.79 (s, 3H), 2.87 (hept,  $J = 7.2$  Hz, 1H), 2.25 (s, 3H), 1.21 (d,  $J = 7.1$  Hz, 3H), 1.06 (d,  $J = 7.2$  Hz, 3H);  $^{13}\text{C}$  NMR (101 MHz,  $\text{CDCl}_3$ )  $\delta$  159.2, 155.3, 148.3, 147.2, 139.8, 136.6, 132.1, 129.3, 126.4, 124.3, 121.2, 119.8, 117.1, 114.1, 111.3, 111.1, 109.7, 60.0, 55.7, 55.4, 28.7, 18.6, 18.6, 17.0; **HRMS** (EI): found  $[\text{M}]^+$  462.2264  $\text{C}_{26}\text{H}_{30}\text{N}_4\text{O}_4$  requires 462.2267; **HPLC** Chiralpak AD-H column (80:20 hexanes:isopropanol, 1.0 mL/min, 356 nm); major enantiomer  $t_r = 14.04$  min, minor enantiomer  $t_r = 22.16$  min, 91% ee; absolute configuration assigned as (*S*) by analogy to **2g**.

(*S,E*)-4-Methyl-*N*-(3-methyl-2-(2-(2-methyl-4-nitrophenyl)hydrazono)-1-phenylbutyl)aniline (**2g**)

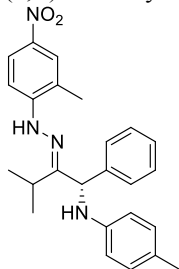

General procedure **A** using arylazoalkene **1a** (92.8 mg, 0.30 mmol) and 4-methylaniline (10.7 mg, 0.10 mmol) with a reaction time of 16 h after column chromatography (9:1 to 4:1 hexanes:ether) afforded **2g** (29.9 mg, 72%) as a yellow foam;  $^1\text{H}$  NMR (400 MHz,  $\text{CDCl}_3$ )  $\delta$  8.13 (dd,  $J = 9.1, 2.6$  Hz, 1H), 8.02 (d,  $J = 1.8$  Hz, 1H), 7.73 (s, 1H), 7.50 – 7.43 (m, 3H), 7.36 (t,  $J = 7.5$  Hz, 2H), 7.31 – 7.25 (m, 1H), 6.96 (d,  $J = 8.1$  Hz, 2H), 6.63 (d,  $J = 8.4$  Hz, 2H), 5.22 (s, 1H), 5.02 (br s, 1H), 2.90 (hept,  $J = 7.5$  Hz, 1H), 2.25 (s, 3H), 2.21 (s, 3H), 1.22 (d,  $J = 7.1$  Hz, 3H), 1.08 (d,  $J = 7.2$  Hz, 3H);  $^{13}\text{C}$  NMR (101 MHz,  $\text{CDCl}_3$ )  $\delta$  155.7, 148.2, 144.5, 140.4, 139.8, 129.8, 128.8, 128.0, 127.9, 127.1, 126.4, 124.3, 119.8, 114.0, 111.2, 60.7, 28.6, 20.5, 18.6, 18.6, 17.0; **HRMS** (EI): found  $[\text{M}]^+$  416.2210  $\text{C}_{25}\text{H}_{28}\text{N}_4\text{O}_2$  requires 416.2212; **HPLC** Chiralpak AD-H column (80:20 hexanes:isopropanol, 1.0 mL/min, 356 nm); major enantiomer  $t_r = 15.04$  min, minor enantiomer  $t_r = 8.75$  min, 95% ee; absolute configuration assigned as (*S*) by X-ray crystal structure analysis; crystals obtained by slow evaporation of toluene solution.

(*S,E*)-3-Methyl-*N*-(3-methyl-2-(2-(2-methyl-4-nitrophenyl)hydrazono)-1-phenylbutyl)aniline (**2h**)

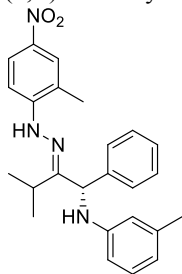

General procedure **A** using arylazoalkene **1a** (92.8 mg, 0.30 mmol) and 3-methylaniline (10.7 mg, 0.10 mmol) with a reaction time of 16 h after column chromatography (9:1 to 4:1 hexanes:ether) afforded **2h** (21.3 mg, 51%) as a yellow foam;  $^1\text{H NMR}$  (400 MHz,  $\text{CDCl}_3$ )  $\delta$  8.14 (dd,  $J = 9.0, 2.6$  Hz, 1H), 8.03 (d,  $J = 2.6$  Hz, 1H), 7.72 (s, 1H), 7.50 – 7.43 (m, 3H), 7.36 (t,  $J = 7.4$  Hz, 2H), 7.31 – 7.25 (m, 1H), 7.04 (t,  $J = 7.7$  Hz, 1H), 6.56 – 6.48 (m, 3H), 5.23 (s, 1H), 5.13 (br s, 1H), 2.90 (hept,  $J = 7.1$  Hz, 1H), 2.26 (s, 3H), 2.25 (s, 3H), 1.22 (d,  $J = 7.1$  Hz, 3H), 1.08 (d,  $J = 7.2$  Hz, 3H);  $^{13}\text{C NMR}$  (101 MHz,  $\text{CDCl}_3$ )  $\delta$  155.6, 148.1, 146.8, 140.4, 139.9, 139.0, 129.2, 128.8, 128.1, 127.9, 126.4, 124.3, 119.8, 118.8, 114.7, 111.2, 110.7, 60.4, 28.7, 21.7, 18.6, 18.6, 17.0; **HRMS** (EI): found  $[\text{M}]^+$  416.2206  $\text{C}_{25}\text{H}_{28}\text{N}_4\text{O}_2$  requires 416.2212; **HPLC** Chiralpak AD-H column (80:20 hexanes:isopropanol, 1.0 mL/min, 356 nm); major enantiomer  $t_r = 10.66$  min, minor enantiomer  $t_r = 7.40$  min, 94% ee; absolute configuration assigned as (*S*) by analogy to **2g**.

(*S,E*)-2-Methyl-*N*-(3-methyl-2-(2-(2-methyl-4-nitrophenyl)hydrazono)-1-phenylbutyl)aniline (**2i**)

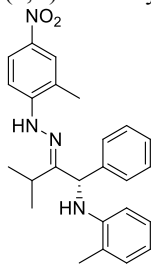

General procedure **A** using arylazoalkene **1a** (92.8 mg, 0.30 mmol) and 2-methylaniline (10.7 mg, 0.10 mmol) with a reaction time of 24 h after column chromatography (9:1 to 4:1 hexanes:ether) afforded **2i** (26.2 mg, 63%) as a yellow film;  $^1\text{H NMR}$  (400 MHz,  $\text{CDCl}_3$ )  $\delta$  8.16 (dd,  $J = 9.1, 2.6$  Hz, 1H), 8.04 (d,  $J = 2.6$  Hz, 1H), 7.76 (s, 1H), 7.53 – 7.45 (m, 3H), 7.36 (t,  $J = 7.4$  Hz, 2H), 7.31 – 7.24 (m, 1H), 7.08 (d,  $J = 7.5$  Hz, 1H), 7.03 (t,  $J = 7.9$  Hz, 1H), 6.67 – 6.58 (m, 2H), 5.40 (br s, 1H), 5.25 (s, 1H), 2.91 (hept,  $J = 7.2$  Hz, 1H), 2.33 (s, 3H), 2.27 (s, 3H), 1.21 (d,  $J = 7.1$  Hz, 3H), 1.09 (d,  $J = 7.2$  Hz, 3H);  $^{13}\text{C NMR}$  (101 MHz,  $\text{CDCl}_3$ )  $\delta$  155.5, 148.1, 144.6, 140.3, 139.9, 130.3, 128.8, 128.2, 127.9, 127.1, 126.5, 124.4, 122.1, 119.9, 117.2, 110.9, 110.6, 60.3, 29.0, 18.6, 18.5, 17.8, 17.0; **HRMS** (EI): found  $[\text{M}]^+$  416.2209  $\text{C}_{25}\text{H}_{28}\text{N}_4\text{O}_2$  requires 416.2212; **HPLC** Chiralpak AD-H column (80:20 hexanes:isopropanol, 1.0 mL/min, 356 nm); major enantiomer  $t_r = 10.26$  min, minor enantiomer  $t_r = 5.27$  min, 89% ee; absolute configuration assigned as (*S*) by analogy to **2g**.

(*S,E*)-*N*-(3-Methyl-2-(2-(2-methyl-4-nitrophenyl)hydrazono)-1-phenylbutyl)-4-(trifluoromethyl)aniline (**2j**)

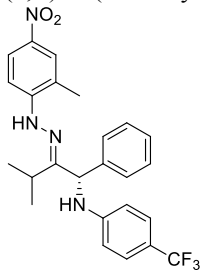

General procedure **A** using arylazoalkene **1a** (92.8 mg, 0.30 mmol) and 4-(trifluoromethyl)aniline (16.1 mg, 0.10 mmol) with a reaction time of 16 h after column chromatography (7:3 to 2:1 hexanes:ether) afforded **2j** (33.5 mg, 71%) as a yellow foam;  $^1\text{H NMR}$  (400 MHz,  $\text{CDCl}_3$ )  $\delta$  8.15 (dd,  $J = 9.0, 2.5$  Hz, 1H), 8.04 (d,  $J = 1.8$  Hz, 1H), 7.73 (s, 1H), 7.50 – 7.41 (m, 3H), 7.41 – 7.33 (m, 4H), 7.33 – 7.27 (m, 1H), 6.68 (d,  $J = 8.4$  Hz, 2H), 5.65 (br d,  $J = 6.6$  Hz, 1H), 5.20 (d,  $J = 6.5$  Hz, 1H), 2.88 (hept,  $J = 7.4$  Hz, 1H), 2.26 (s,

3H), 1.21 (d,  $J = 7.1$  Hz, 3H), 1.08 (d,  $J = 7.2$  Hz, 3H);  $^{13}\text{C}$  NMR (101 MHz,  $\text{CDCl}_3$ )  $\delta$  154.6, 149.0, 147.9, 140.0, 139.5, 129.0, 128.3, 128.1, 126.65 (q,  $J = 3.8$  Hz), 126.5, 125.01 (q,  $J = 270.4$  Hz), 124.3, 120.0, 119.15 (q,  $J = 32.5$  Hz), 112.7, 111.1, 59.8, 28.9, 18.6, 18.5, 17.0;  $^{19}\text{F}$  NMR (376 MHz,  $\text{CDCl}_3$ )  $\delta$  -60.26 (s); HRMS (EI): found  $[\text{M}]^+$  470.1924  $\text{C}_{25}\text{H}_{25}\text{F}_3\text{N}_4\text{O}_2$  requires 470.1930; HPLC Chiralpak AD-H column (80:20 hexanes:isopropanol, 1.0 mL/min, 259 nm); major enantiomer  $t_r = 8.52$  min, minor enantiomer  $t_r = 6.16$  min, 91% ee; absolute configuration assigned as (*S*) by analogy to **2g**.

(*S,E*)-4-Bromo-*N*-(3-methyl-2-(2-(2-methyl-4-nitrophenyl)hydrazono)-1-phenylbutyl)aniline (**2k**)

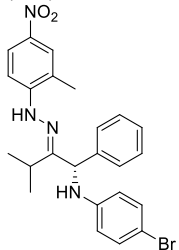

General procedure **A** using arylazoalkene **1a** (92.8 mg, 0.30 mmol) and 4-bromoaniline (17.2 mg, 0.10 mmol) with a reaction time of 16 h after column chromatography (9:1 to 3:1 hexanes:ether) afforded **2k** (41.4 mg, 86%) as a yellow foam;  $^1\text{H}$  NMR (400 MHz,  $\text{CDCl}_3$ )  $\delta$  8.12 (dd,  $J = 9.0, 2.6$  Hz, 1H), 8.01 (d,  $J = 2.0$  Hz, 1H), 7.73 (s, 1H), 7.47 – 7.40 (m, 3H), 7.38 – 7.33 (m, 2H), 7.32 – 7.27 (m, 1H), 7.21 (d,  $J = 8.9$  Hz, 2H), 6.57 (d,  $J = 8.9$  Hz, 2H), 5.29 (br d,  $J = 6.6$  Hz, 1H), 5.16 (d,  $J = 5.6$  Hz, 1H), 2.89 (hept,  $J = 7.3$  Hz, 1H), 2.24 (s, 3H), 1.21 (d,  $J = 7.1$  Hz, 3H), 1.07 (d,  $J = 7.2$  Hz, 3H);  $^{13}\text{C}$  NMR (101 MHz,  $\text{CDCl}_3$ )  $\delta$  154.9, 148.0, 145.6, 139.9, 139.7, 131.9, 128.9, 128.1, 128.0, 126.4, 124.3, 119.9, 115.3, 111.1, 109.4, 60.3, 28.7, 18.6, 18.5, 17.0; HRMS (EI): found  $[\text{M}]^+$  482.1132  $\text{C}_{24}\text{H}_{25}^{81}\text{BrN}_4\text{O}_2$  requires 482.1140; HPLC Chiralpak AD-H column (80:20 hexanes:isopropanol, 1.0 mL/min, 356 nm); major enantiomer  $t_r = 15.35$  min, minor enantiomer  $t_r = 9.32$  min, 94% ee; absolute configuration assigned as (*S*) by analogy to **2g**.

(*S,E*)-4-Methoxy-*N*-(3-methyl-2-(2-(2-methyl-4-nitrophenyl)hydrazono)-1-phenylbutyl)aniline (**2l**)

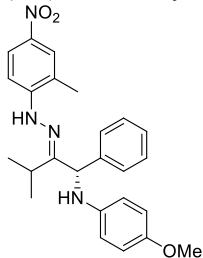

General procedure **A** using arylazoalkene **1a** (92.8 mg, 0.30 mmol) and 4-methoxyaniline (12.3 mg, 0.10 mmol) with a reaction time of 16 h after column chromatography (4:1 to 2:1 hexanes:ether) afforded **2l** (36.6 mg, 85%) as a yellow foam;  $^1\text{H}$  NMR (400 MHz,  $\text{CDCl}_3$ )  $\delta$  8.13 (dd,  $J = 9.0, 2.6$  Hz, 1H), 8.03 (d,  $J = 2.4$  Hz, 1H), 7.71 (s, 1H), 7.48 – 7.42 (m, 3H), 7.34 (t,  $J = 7.4$  Hz, 2H), 7.27 (t,  $J = 7.3$  Hz, 1H), 6.74 (d,  $J = 9.0$  Hz, 2H), 6.66 (d,  $J = 9.0$  Hz, 2H), 5.16 (s, 1H), 4.84 (br s, 1H), 3.71 (s, 3H), 2.88 (hept,  $J = 7.2$  Hz, 1H), 2.25 (s, 3H), 1.20 (d,  $J = 7.1$  Hz, 3H), 1.05 (d,  $J = 7.2$  Hz, 3H);  $^{13}\text{C}$  NMR (101 MHz,  $\text{CDCl}_3$ )  $\delta$  155.8, 152.4, 148.2, 141.0, 140.4, 139.8, 128.8, 128.0, 127.9, 126.4, 124.3, 119.8, 115.4, 114.8, 111.2, 61.5, 55.8, 28.6, 18.6, 18.6, 17.0; HRMS (EI): found  $[\text{M}]^+$  432.2155  $\text{C}_{25}\text{H}_{28}\text{N}_4\text{O}_3$  requires 432.2161; HPLC Chiralpak AD-H column (80:20 hexanes:isopropanol, 1.0 mL/min, 356 nm); major enantiomer  $t_r = 21.71$  min, minor enantiomer  $t_r = 12.56$  min, 94% ee; absolute configuration assigned as (*S*) by analogy to **2g**.

(*S,E*)-*N*-Methyl-*N*-(3-methyl-2-(2-(2-methyl-4-nitrophenyl)hydrazono)-1-phenylbutyl)aniline (**2m**)

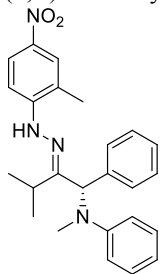

General procedure **A** using arylazoalkene **1a** (92.8 mg, 0.30 mmol) and *N*-methylaniline (10.7 mg, 0.10 mmol) with a reaction time of 24 h after column chromatography (9:1 to 4:1 hexanes:ether) afforded **2m** (28.2 mg, 68%) as a orange film; **<sup>1</sup>H NMR** (400 MHz, CDCl<sub>3</sub>) δ 8.00 – 7.92 (m, 2H), 7.79 (br s, 1H), 7.41 – 7.22 (m, 7H), 7.06 (d, *J* = 9.0 Hz, 1H), 6.85 (d, *J* = 8.2 Hz, 2H), 6.76 (t, *J* = 7.3 Hz, 1H), 5.81 (s, 1H), 3.02 – 2.92 (m, 4H), 2.25 (s, 3H), 1.27 (d, *J* = 6.9 Hz, 3H), 1.22 (d, *J* = 7.1 Hz, 3H); **<sup>13</sup>C NMR** (101 MHz, CDCl<sub>3</sub>) δ 155.5, 149.7, 148.2, 139.8, 139.0, 129.4, 128.7, 128.3, 127.3, 126.3, 124.2, 119.7, 117.3, 113.1, 111.5, 63.9, 34.7, 28.4, 18.9, 18.5, 16.9; **HRMS** (EI): found [*M*]<sup>+</sup> 416.2204 C<sub>25</sub>H<sub>28</sub>N<sub>4</sub>O<sub>2</sub> requires 416.2212; **HPLC** Chiralpak AD-H column (98:02 hexanes:isopropanol, 1.0 mL/min, 356 nm); major enantiomer *t<sub>r</sub>* = 10.01 min, minor enantiomer *t<sub>r</sub>* = 9.46 min, 90% ee; absolute configuration assigned as (*S*) by analogy to **2g**.

(*R,E*)-2-Methoxy-*N*-(2-(2-(4-nitrophenyl)hydrazono)cyclohexyl)aniline (**2n**)

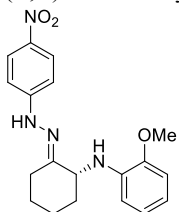

To a 2 dram (7.4 mL) glass vial equipped with a magnetic stir bar was added **1n** (46.3 mg, 0.20 mmol), (*R*)-TRIP (**H-3a**) (7.5 mg, 0.010 mmol), and 5A molecular sieves (400 mg). A solution of 2-methoxyaniline (29.6 mg, 0.24 mmol) in benzene (4 mL) was added, the vial capped with a PTFE screw cap, protected from ambient light, and stirred at r.t. for 2 h. The reaction mixture was loaded directly onto the column and purified by column chromatography (petroleum ether:acetone 4:1) and additional column chromatography (1:1 petroleum ether:ether) to afford **2n** (44.1 mg, 62%) as a yellow foam; **<sup>1</sup>H NMR** (400 MHz, DMSO-*d*<sub>6</sub>) δ 10.21 (s, 1H), 8.11 (d, *J* = 9.0 Hz, 2H), 7.14 (d, *J* = 8.8 Hz, 2H), 6.86 (d, *J* = 8.0 Hz, 1H), 6.77 (t, *J* = 7.5 Hz, 1H), 6.66 (d, *J* = 7.7 Hz, 1H), 6.58 (t, *J* = 7.5 Hz, 1H), 5.61 (br s, 1H), 4.06 – 3.95 (m, 1H), 3.89 (s, 3H), 3.04 (d, *J* = 14.0 Hz, 1H), 2.40 – 2.27 (m, 1H), 2.15 – 2.03 (m, 1H), 1.93 – 1.62 (m, 3H), 1.54 – 1.33 (m, 2H); **<sup>13</sup>C NMR** (101 MHz, DMSO-*d*<sub>6</sub>) δ 152.7, 151.8, 146.5, 138.0, 137.2, 125.9, 121.0, 116.0, 111.0, 110.2, 109.8, 56.1, 55.5, 35.2, 26.0, 25.8, 23.3; **HRMS** (EI): found [*M*]<sup>+</sup> 354.1693 C<sub>19</sub>H<sub>22</sub>N<sub>4</sub>O<sub>3</sub> requires 354.1692; **HPLC** Chiralpak AD-H column (90:10 hexanes:isopropanol, 1.0 mL/min, 259 nm); major enantiomer *t<sub>r</sub>* = 21.37 min, minor enantiomer *t<sub>r</sub>* = 18.73 min, 90% ee; absolute configuration tentatively assigned as (*R*) by analogy to **4n**.

(*E*)-2-methoxy-*N*-(2-(2-(2-methyl-4-nitrophenyl)hydrazono)-1-(*p*-tolyl)propyl)aniline (**2o**)

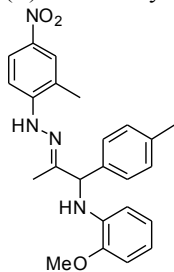

To a 2 dram (7.4 mL) glass vial equipped with a magnetic stir bar was added **1o** (58.9 mg, 0.20 mmol), (*R*)-TRIP (**H-3a**) (30.1 mg, 0.040 mmol), and 5A molecular sieves (400 mg). A solution of 2-methoxyaniline (73.9 mg, 0.60 mmol) in benzene (4 mL) was added, the vial capped with a PTFE screw cap, protected from ambient light, and stirred at r.t. for 14 h. The reaction mixture was loaded directly onto the column and purified by column chromatography (hexanes:ether 3:1 to 2:1) to afford **2o** (41.0 mg, 49%) as a yellow

film;  $^1\text{H NMR}$  (400 MHz,  $\text{CDCl}_3$ )  $\delta$  8.15 (dd,  $J = 9.1, 2.5$  Hz, 1H), 8.02 (d,  $J = 2.1$  Hz, 1H), 7.64 (d,  $J = 9.2$  Hz, 1H), 7.41 – 7.32 (m, 3H), 7.19 (d,  $J = 7.9$  Hz, 2H), 6.83 – 6.74 (m, 2H), 6.68 (td,  $J = 7.7, 1.6$  Hz, 1H), 6.60 (dd,  $J = 7.8, 1.5$  Hz, 1H), 5.83 (br s, 1H), 5.09 (s, 1H), 3.94 (s, 3H), 2.35 (s, 3H), 2.23 (s, 3H), 1.88 (s, 3H);  $^{13}\text{C NMR}$  (101 MHz,  $\text{CDCl}_3$ )  $\delta$  149.8, 148.2, 147.1, 139.8, 137.8, 137.1, 136.8, 129.7, 127.4, 126.4, 124.2, 121.3, 119.9, 117.2, 111.6, 111.1, 109.6, 63.8, 55.7, 21.2, 16.9, 12.3; **HRMS** (EI): found  $[\text{M}]^+$  418.2004  $\text{C}_{24}\text{H}_{26}\text{N}_4\text{O}_3$  requires 418.2005; **HPLC** Chiralpak AD-H column (80:20 hexanes:isopropanol, 1.0 mL/min, 356 nm); major enantiomer  $t_r = 8.22$  min, minor enantiomer  $t_r = 14.30$  min, 90% ee.

(*S,Z*)-*N*-(5-(benzyloxy)-2-(2-(4-nitrophenyl)hydrazono)-1-phenylpentyl)-2-methoxyaniline (**2p<sub>Z</sub>**)

(*S,E*)-*N*-(5-(benzyloxy)-2-(2-(4-nitrophenyl)hydrazono)-1-phenylpentyl)-2-methoxyaniline (**2p<sub>E</sub>**)

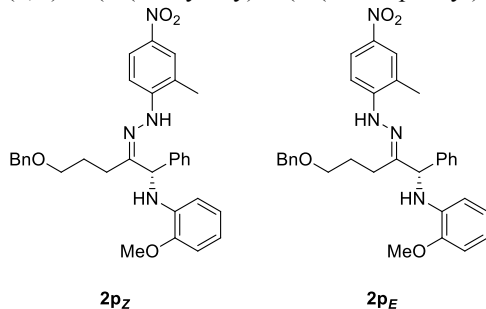

To a 1 dram (3.7 mL) glass vial equipped with a magnetic stir bar was added **1p** (124 mg, 0.30 mmol), (*R*)-TRIP (**H-3a**) (7.6 mg, 0.010 mmol), 5A molecular sieves (200 mg). 2-methoxyaniline (12.4 mg, 0.10 mmol) in benzene (2 mL) was added, the vial capped with a PTFE screw cap, protected from ambient light, and stirred at r.t. for 14 h. The reaction mixture was loaded directly onto the column and purified by column chromatography (hexanes:ether 4:1 to 3:1) to afford a mixture **2p<sub>Z</sub>** (37.5 mg, 70%) and **2p<sub>E</sub>** (9.7 mg, 18%) as a yellow film;  $^1\text{H NMR}$  (400 MHz,  $\text{CDCl}_3$ )  $\delta$  (**2p<sub>Z</sub>**) 11.21 (br s, 1H), 8.06 (dd,  $J = 9.2, 2.5$  Hz, 1H), 7.91 (d,  $J = 2.5$  Hz, 1H), 7.48 – 7.26 (m, 11H), 6.91 – 6.85 (m, 3H), 6.69 – 6.65 (m, 1H), 4.98 (d,  $J = 1.6$  Hz, 1H), 4.75 (br d,  $J = 1.5$  Hz, 1H), 4.50 (s, 2H), 3.84 (s, 3H), 3.64 – 3.50 (m, 2H), 2.67 – 2.55 (m, 1H), 2.47 – 2.37 (m, 1H), 2.15 – 1.97 (m, 2H), 1.92 (s, 3H);  $\delta$  (**2p<sub>E</sub>**) 8.18 – 8.12 (m, 1H), 7.97 (d,  $J = 2.2$  Hz, 1H), 7.67 (d,  $J = 9.0$  Hz, 1H), 7.55 – 7.48 (m, 2H), 7.49 – 7.25 (m, 8H), 6.82 (dd,  $J = 7.6, 1.0$  Hz, 1H), 6.76 (td,  $J = 7.7, 1.3$  Hz, 1H), 6.71 – 6.64 (m, 1H), 6.55 (dd,  $J = 7.8, 1.3$  Hz, 1H), 6.13 (br s, 1H), 5.08 (br s, 1H), 4.49 (s, 2H), 3.97 (s, 3H), 3.43 – 3.30 (m, 2H), 2.50 – 2.43 (m, 2H), 2.15 – 1.96 (m, 5H);  $^{13}\text{C NMR}$  (101 MHz,  $\text{CDCl}_3$ )  $\delta$  (**2p<sub>Z</sub>**+**2p<sub>E</sub>**) 151.7, 149.3, 149.0, 148.7, 147.5, 147.1, 140.4, 139.6, 138.9, 138.5, 137.8, 137.6, 136.9, 135.9, 129.7, 129.1, 128.9, 128.6, 128.5, 128.14, 128.12, 128.09, 128.0, 127.71, 127.69, 127.65, 126.4, 126.3, 124.2, 124.0, 121.6, 121.2, 120.7, 120.3, 120.0, 116.9, 112.0, 111.5, 110.9, 109.9, 109.7, 109.5, 73.1, 73.0, 69.7, 68.4, 64.6, 63.3, 55.7, 55.4, 32.4, 26.5, 25.6, 23.6, 16.8, 16.6; **HRMS** (ESI): found  $[\text{M}+\text{H}]^+$  539.2647  $\text{C}_{32}\text{H}_{35}\text{N}_4\text{O}_4$  requires 539.2653; **HPLC** Chiralpak AD-H column (90:10 hexanes:isopropanol, 1.0 mL/min, 356 nm); **2p<sub>Z</sub>**: major enantiomer  $t_r = 6.86$  min, minor enantiomer  $t_r = 9.98$  min, 91% ee; **2p<sub>E</sub>**: major enantiomer  $t_r = 12.20$  min, minor enantiomer  $t_r = 20.27$  min, 42% ee; absolute configuration tentatively assigned as (*S*) by analogy to **2g**; major product assigned as (*Z*) by based on the presence of the downfield hydrazone proton according to ref. S9.

## Hydrolysis of products **2b**, **2n**, **2o** to respective ketones **4b**, **4n**, **4o**

### (*S*)-1-(4-chlorophenyl)-1-((2-methoxyphenyl)amino)-3-methylbutan-2-one (**4b**)

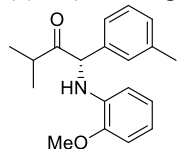

To a 1 dram (3.7 mL) glass vial equipped with a magnetic stir bar was added **2b** (26 mg, 0.058 mmol), paraformaldehyde (14 mg, 0.47 mmol), acetone (0.7 mL) and water (0.07 mL). To the resulting suspension was added Amberlyst-15 ion-exchange resin (10 mg) and the mixture was stirred at room temperature for 15 h until TLC showed complete consumption of starting hydrazone **2b**. The mixture was then passed through a celite plug and the filtrate was extracted with DCM (2 x 3mL), dried over Na<sub>2</sub>SO<sub>4</sub>, and concentrated under reduced pressure. The crude product was purified by column chromatography (hexanes:ether 19:1) to afford **4b** (12.5 mg, 72%) as a pale yellow film; <sup>1</sup>H NMR (500 MHz, CDCl<sub>3</sub>) δ 7.30 – 7.22 (m, 3H), 7.10 (d, *J* = 7.5 Hz, 1H), 6.76 (d, *J* = 7.8 Hz, 1H), 6.71 (td, *J* = 7.6, 1.1 Hz, 1H), 6.62 (td, *J* = 7.7, 1.5 Hz, 1H), 6.39 (dd, *J* = 7.8, 1.2 Hz, 1H), 5.99 (br d, *J* = 4.4 Hz, 1H), 5.08 (d, *J* = 4.7 Hz, 1H), 3.90 (s, 3H), 2.85 (hept, *J* = 7.0 Hz, 1H), 2.34 (s, 3H), 1.16 (d, *J* = 7.0 Hz, 3H), 0.82 (d, *J* = 6.6 Hz, 3H); <sup>13</sup>C NMR (126 MHz, CDCl<sub>3</sub>) δ 210.4, 147.1, 138.9, 138.1, 136.3, 129.2, 129.0, 128.6, 125.4, 121.0, 116.9, 110.6, 109.5, 66.3, 55.6, 37.0, 21.6, 19.7, 18.5; HRMS (ESI): found [M+H]<sup>+</sup> 298.1804 C<sub>19</sub>H<sub>24</sub>NO<sub>2</sub> requires 298.1802; HPLC Chiralpak AD-H column (98:02 hexanes:isopropanol, 1.0 mL/min, 285 nm); major enantiomer t<sub>r</sub> = 9.24 min, minor enantiomer t<sub>r</sub> = 6.10 min, 93% ee; absolute configuration assigned as (*S*) by analogy to **2b**.

### (*R*)-2-((2-methoxyphenyl)amino)cyclohexanone (**4n**)

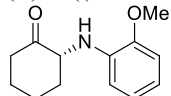

To a 1 dram (3.7 mL) glass vial equipped with a magnetic stir bar was added **2n** (25 mg, 0.07 mmol), paraformaldehyde (10 mg, 0.35 mmol), acetone (1.4 mL) and water (1.4 mL). To the resulting suspension was added Amberlyst-15 ion-exchange resin (7.3 mg) and the mixture was stirred at room temperature for 40 h until TLC showed complete consumption of starting hydrazone **2n**. The mixture was then passed through a celite plug and the filtrate was extracted with DCM (2 x 3mL), dried over Na<sub>2</sub>SO<sub>4</sub>, and concentrated under reduced pressure. The crude product was purified by column chromatography (hexanes:ether 9:1) to afford **4n** (12.9 mg, 84%) as a colorless film; <sup>1</sup>H NMR (500 MHz, CDCl<sub>3</sub>) δ 6.83 (td, *J* = 7.6, 1.4 Hz, 1H), 6.78 (dd, *J* = 7.9, 1.4 Hz, 1H), 6.67 (td, *J* = 7.7, 1.5 Hz, 1H), 6.50 (dd, *J* = 7.9, 1.5 Hz, 1H), 5.34 (br s, 1H), 4.05-3.95 (m, 1H), 3.87 (s, 3H), 2.70-2.63 (m, 1H), 2.63-2.56 (m, 1H), 2.43 (tdd, *J* = 13.4, 6.2, 1.4 Hz, 1H), 2.20-2.11 (m, 1H), 1.99-1.95 (m, 1H), 1.88-1.78 (m, 1H), 1.73 (qt, *J* = 13.0, 4.0 Hz, 1H), 1.51 (dq, *J* = 12.5, 3.5 Hz, 1H); <sup>13</sup>C NMR (126 MHz, CDCl<sub>3</sub>) δ 208.5, 147.2, 136.6, 121.2, 116.9, 109.8, 109.8, 61.8, 55.6, 41.3, 35.8, 28.3, 24.2; HRMS (ESI): found [M+H]<sup>+</sup> 220.1332 C<sub>13</sub>H<sub>18</sub>NO<sub>2</sub> requires 220.1331; HPLC Chiralpak IA column (97:03 hexanes:isopropanol, 1.0 mL/min, 285 nm); major enantiomer t<sub>r</sub> = 7.76 min, minor enantiomer t<sub>r</sub> = 12.00 min, 90% ee; absolute configuration tentatively assigned as (*R*) by an ethanolic sodium borohydride reduction and subsequent comparison previously reported HPLC retention times.<sup>S10</sup>

### 1-((2-methoxyphenyl)amino)-1-(*p*-tolyl)propan-2-one (**4o**)

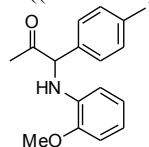

To a 1 dram (3.7 mL) glass vial equipped with a magnetic stir bar was added **2o** (34 mg, 0.08 mmol), paraformaldehyde (11.4 mg, 0.4 mmol), acetone (1.7 mL) and water (1.7 mL). To the resulting suspension was added Amberlyst-15 ion-exchange resin (8.3 mg) and the mixture was stirred at room temperature for 48 h until TLC showed complete consumption of starting hydrazone **2o**. The mixture was then passed through a celite plug and the filtrate was extracted with DCM (2 x 3mL), dried over Na<sub>2</sub>SO<sub>4</sub>, and concentrated under reduced pressure. The crude product was purified by column chromatography (hexanes:ether 9:1) to afford **4o** (18.9 mg, 82%) as a colorless film; <sup>1</sup>H NMR (500 MHz, CDCl<sub>3</sub>) δ 7.35 (d, *J* = 8.1 Hz, 2H), 7.17 (d, *J* = 7.8 Hz, 2H), 6.75 (dd, *J* = 7.9, 1.4 Hz, 1H), 6.69



(td,  $J = 7.6, 1.4$  Hz, 1H), 6.62 (td,  $J = 7.7, 1.6$  Hz, 1H), 6.33 (dd,  $J = 7.7, 1.6$  Hz, 1H), 5.86 (br d,  $J = 4.3$  Hz, 1H), 4.95 (d,  $J = 4.2$  Hz, 1H), 3.89 (s, 3H), 2.33 (s, 3H), 2.14 (s, 3H);  $^{13}\text{C}$  NMR (126 MHz,  $\text{CDCl}_3$ )  $\delta$  204.5, 147.1, 138.3, 136.2, 135.2, 130.0, 127.8, 121.1, 117.0, 110.7, 109.5, 68.0, 55.6, 26.8, 21.3; **HRMS** (ESI): found  $[\text{M}+\text{H}]^+$  220.1332  $\text{C}_{17}\text{H}_{20}\text{NO}_2$  requires 220.1331; **HPLC** Chiralpak IA column (97:03 hexanes:isopropanol, 1.0 mL/min, 285 nm); major enantiomer  $t_r = 7.33$  min, minor enantiomer  $t_r = 8.81$  min, 90% ee.

## References

- (S1) Romanov-Michailidis, F.; Guénée, L.; Alexakis, A. *Angew. Chem. Int. Ed.* **2013**, *52*, 9266.
- (S2) Romanov-Michailidis, F.; Guénée, L.; Alexakis, A. *Org. Lett.* **2013**, *15*, 5890.
- (S3) Rauniyar, V.; Wang, Z. J.; Burks, H. E.; Toste F. D. *J. Am. Chem. Soc.* **2011**, *133*, 8486.
- (S4) Nelson, H. M.; Patel, J. S.; Shunatona, H. P.; Toste, F. D. *Chem. Sci.* **2015**, *6*, 170.
- (S5) Neel, A. J.; Hehn, J. P.; Tripet, P. F.; Toste, F. D. *J. Am. Chem. Soc.* **2013**, *135*, 14044.
- (S6) Yao, L.-H.; Shao, S.-X.; Jiang, L.; Tang, N.; Wu, J.-C. *Chem. Pap.* **2014**, *68*, 1381.
- (S7) Maryanoff, B. E.; Kinney, W. A.; Lawson, E. C.; Luci, D. K.; Marchenko, N.; Sviridov, S.; Ghosh, S. U.S. Patent US2011136824, June 9, 2011.
- (S8) Brodka, S.; Simon, H. *Chem. Ber.* **1969**, *102*, 3647.
- (S9) Bozzini, S.; Felluga, F.; Nardin, G.; Pizzioli, A.; Pitacco, G.; Valentin, E. *J. Chem. Soc., Perkin Trans. 1* **1996**, 1961.
- (S10) (a) Gao, B.; Wen, Y.; Yang, Z.; Huang, X.; Liu, X.; Feng, X. *Adv. Synth. Catal.* **2008**, *350*, 385. (b) Bao, H.; Wu, J.; Li, H.; Wang, Z.; You, T.; Ding, K. *Eur. J. Org. Chem.* **2010**, 6722. (c) Bao, H.; Wang, Z.; You, T.; Ding, K. *Chin. J. Chem.* **2013**, *31*, 67.

S1b (1H NMR)  
CDCl3 400 MHz

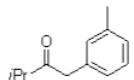

7.26  
7.24  
7.22  
7.20  
7.09  
7.07  
7.03  
7.02  
7.00

3.72  
2.79  
2.78  
2.76  
2.74  
2.72  
2.71  
2.69  
2.35  
1.12  
1.10

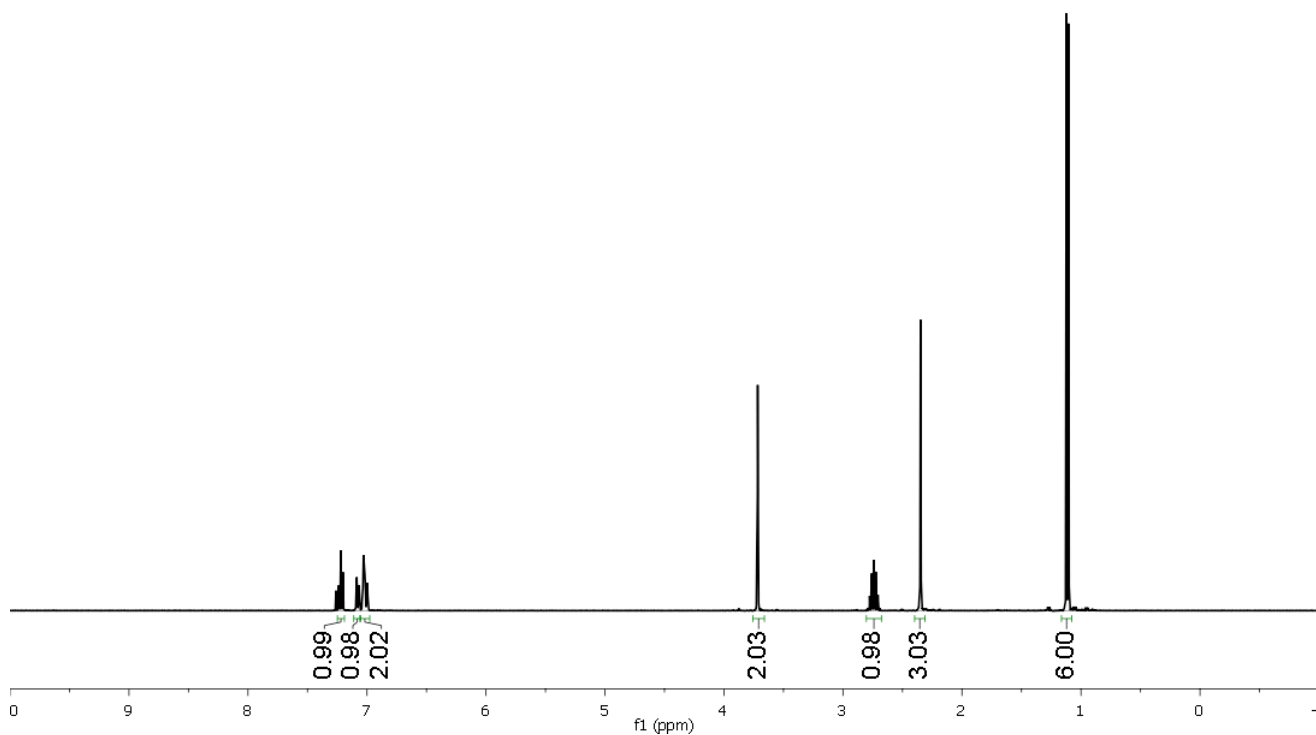

S1b (13C NMR)  
CDCl3 101 MHz

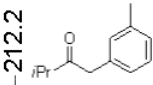

212.2  
138.3  
134.4  
130.3  
128.6  
127.7  
126.5  
77.2 CDCl3  
47.8  
40.1  
21.5  
18.4

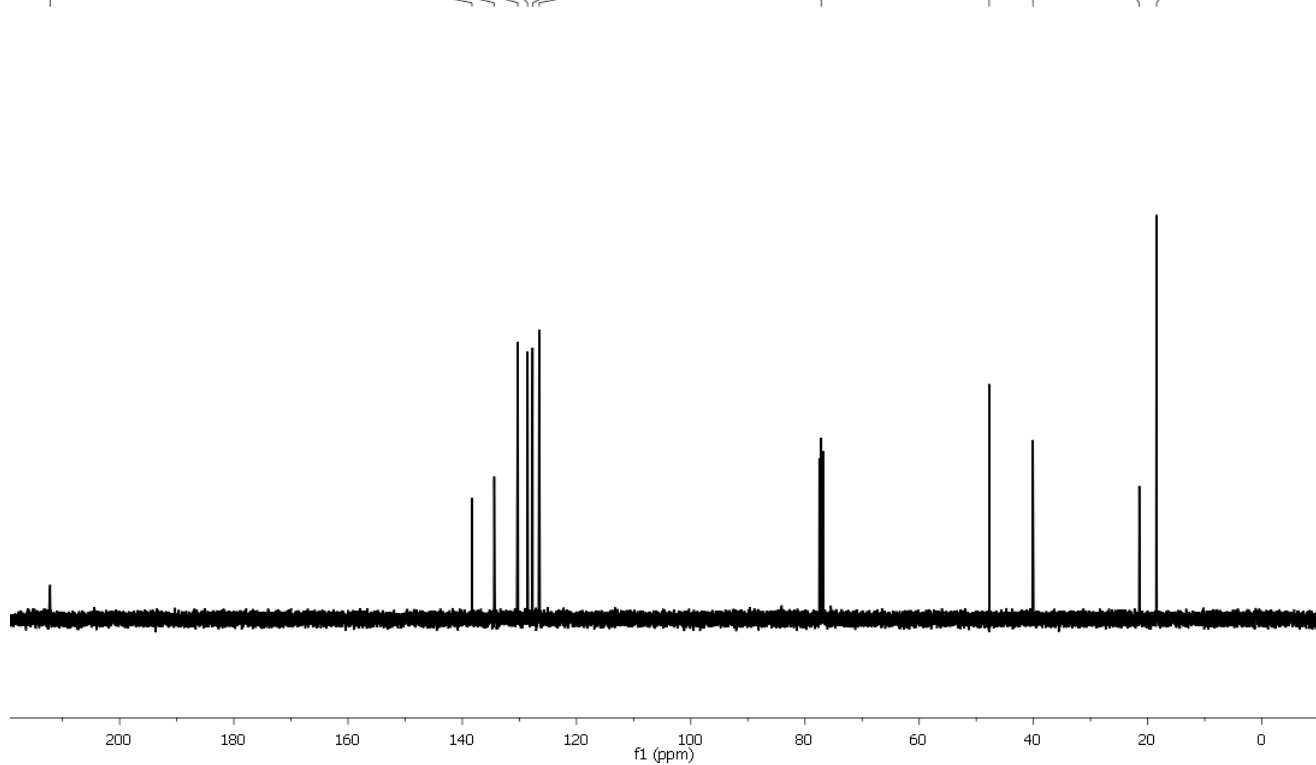

S1c (1H NMR)  
CDCl3 400 MHz

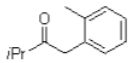

7.26  
7.20  
7.19  
7.18  
7.17  
7.16  
7.13  
7.12  
7.11

-3.78  
2.79  
2.78  
2.76  
2.74  
2.73  
2.71  
2.69  
2.24  
1.14  
1.12

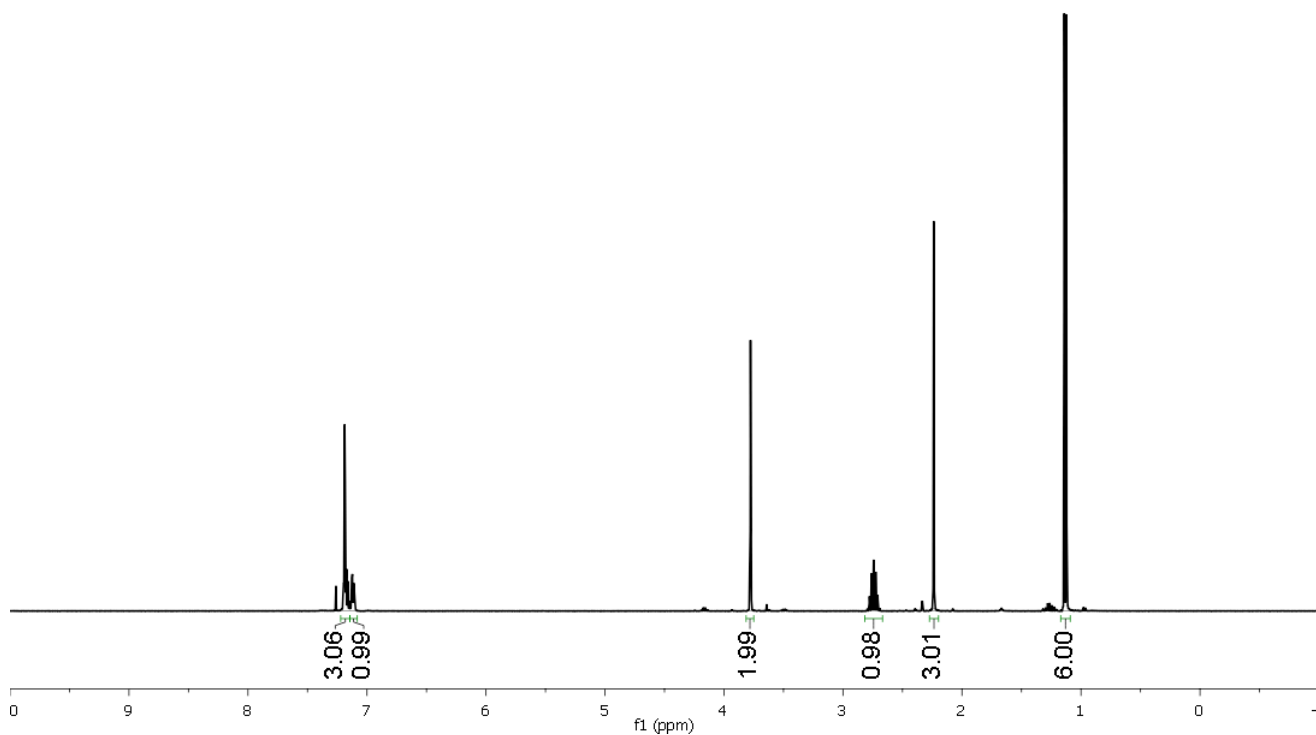

S1c (13C NMR)  
CDCl3 101 MHz

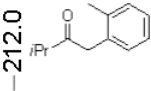

-212.0

137.0  
133.4  
130.5  
127.3  
126.2

-77.2 CDCl3

-46.1  
-40.0

19.8  
18.6

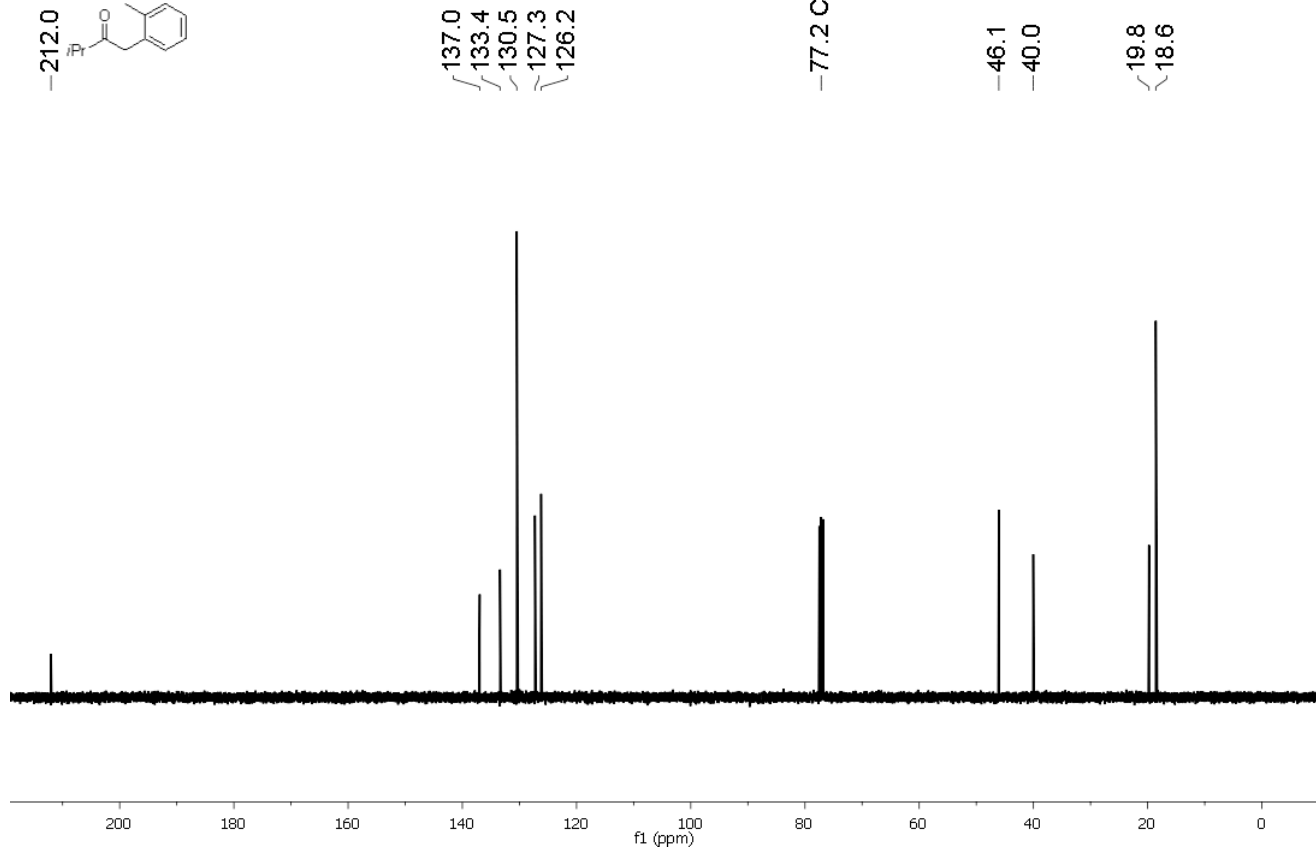

S1d (1H NMR)  
CDCl3 400 MHz

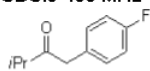

7.26 CHCl3  
7.16  
7.15  
7.14  
7.13  
7.02  
7.00  
6.98

3.72  
2.77  
2.75  
2.73  
2.71  
2.70  
2.68  
2.66

1.11  
1.10

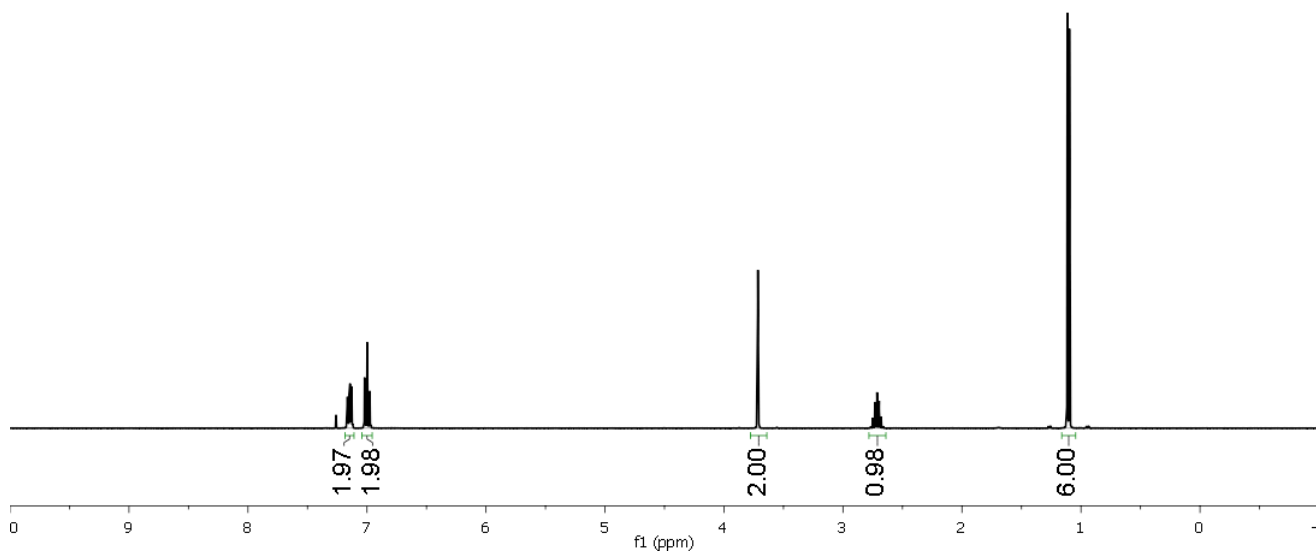

S1d (13C NMR)  
CDCl3 101 MHz

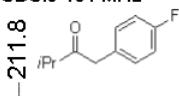

163.2  
160.7

131.1  
131.0  
130.2  
130.2  
115.6  
115.4

77.2 CDCl3

46.7  
40.4

18.4

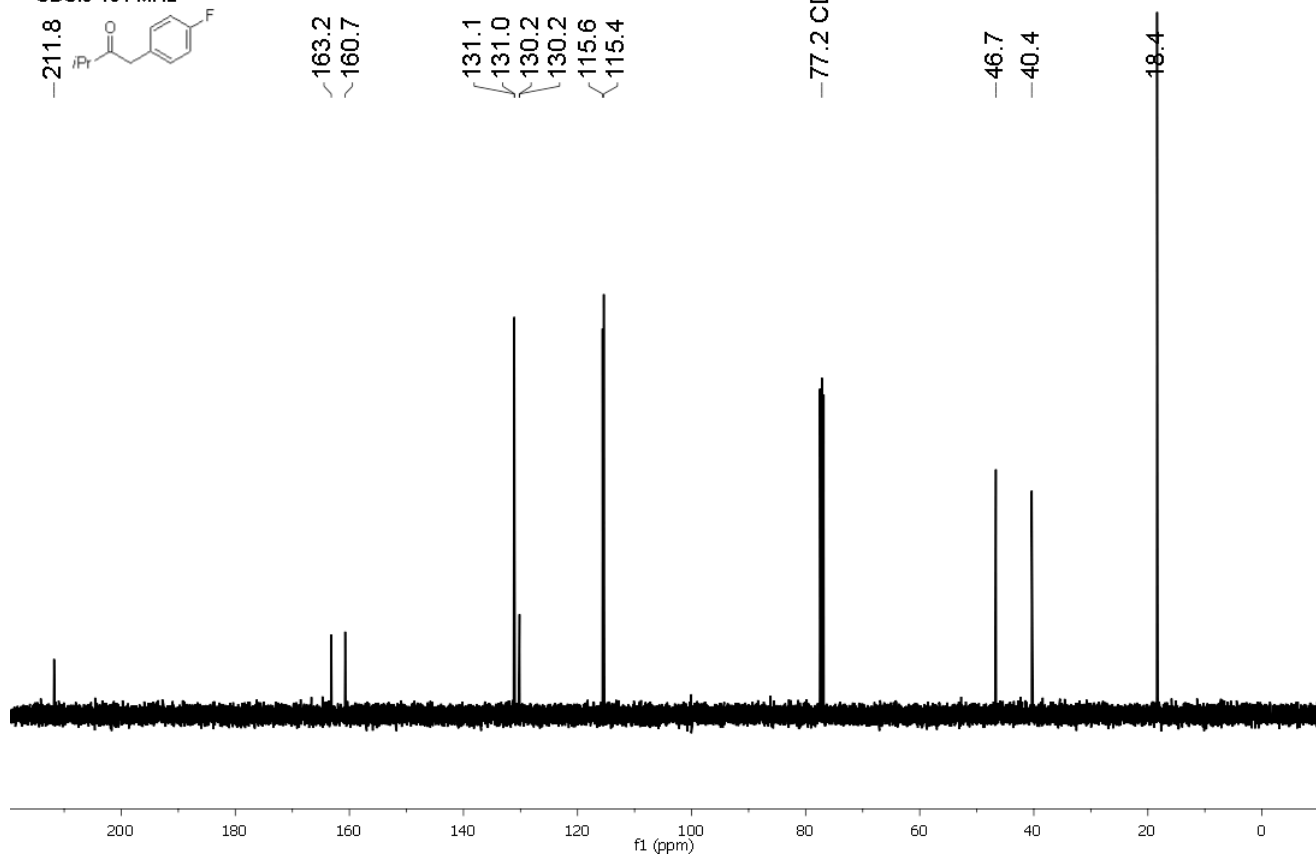

S1d (19F NMR)  
CDCl3 376 MHz

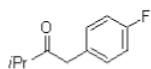

-115.31  
-115.32  
-115.33  
-115.35  
-115.36  
-115.37  
-115.38

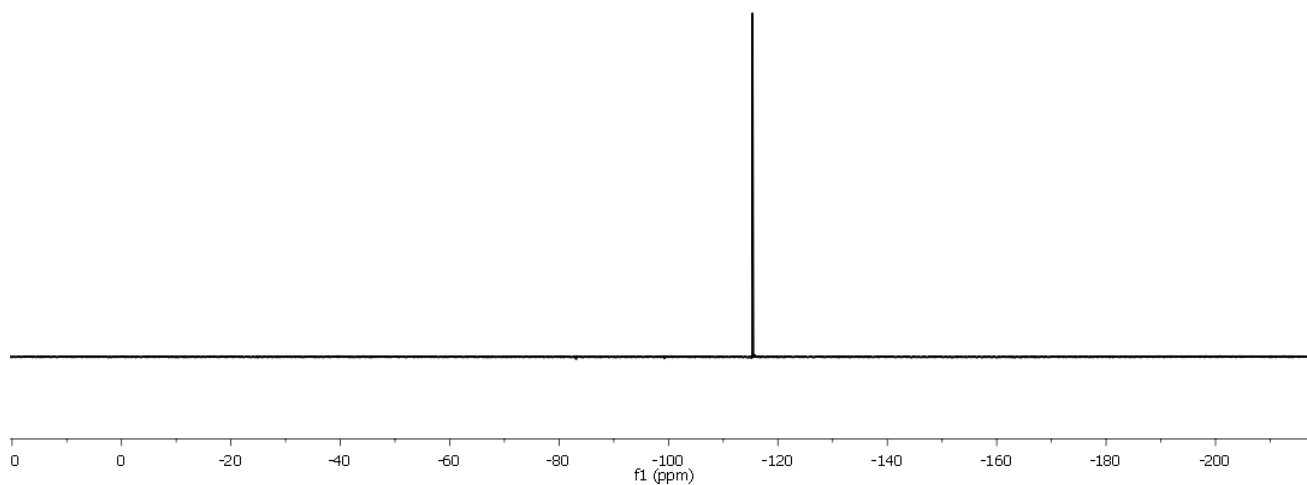

S1e (1H NMR)  
CDCl3 400 MHz

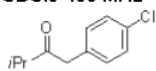

7.29  
7.27  
7.26 CHCl3  
7.13  
7.11

3.71  
2.76  
2.74  
2.72  
2.71  
2.69  
2.67  
2.66

1.12  
1.10

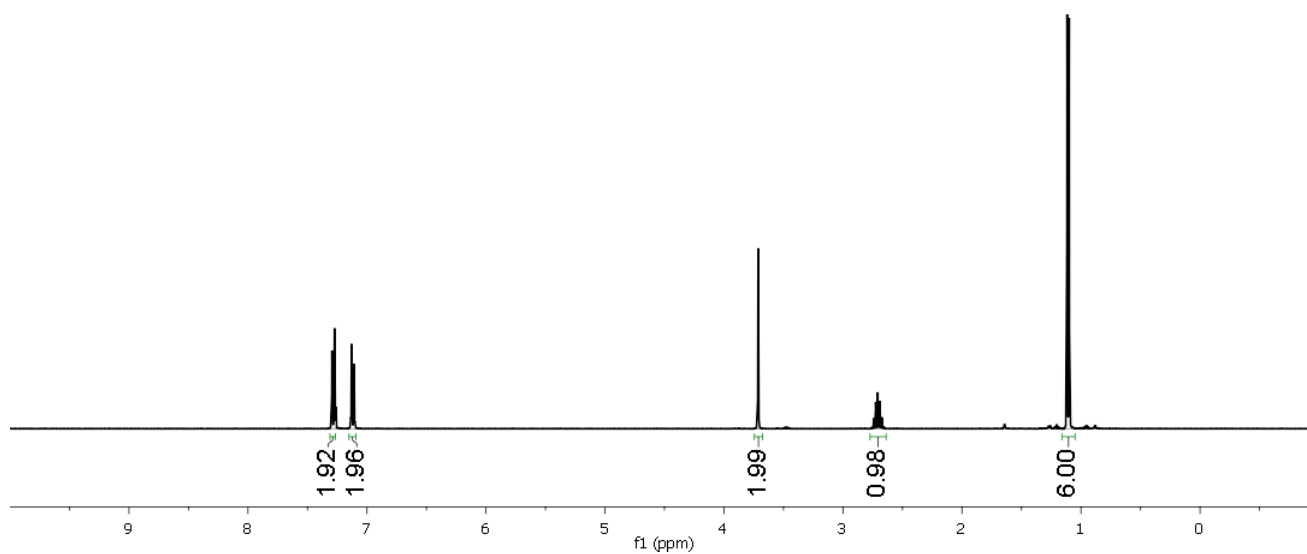

S1e (13C NMR)  
CDCl3 101 MHz

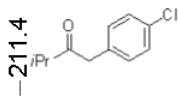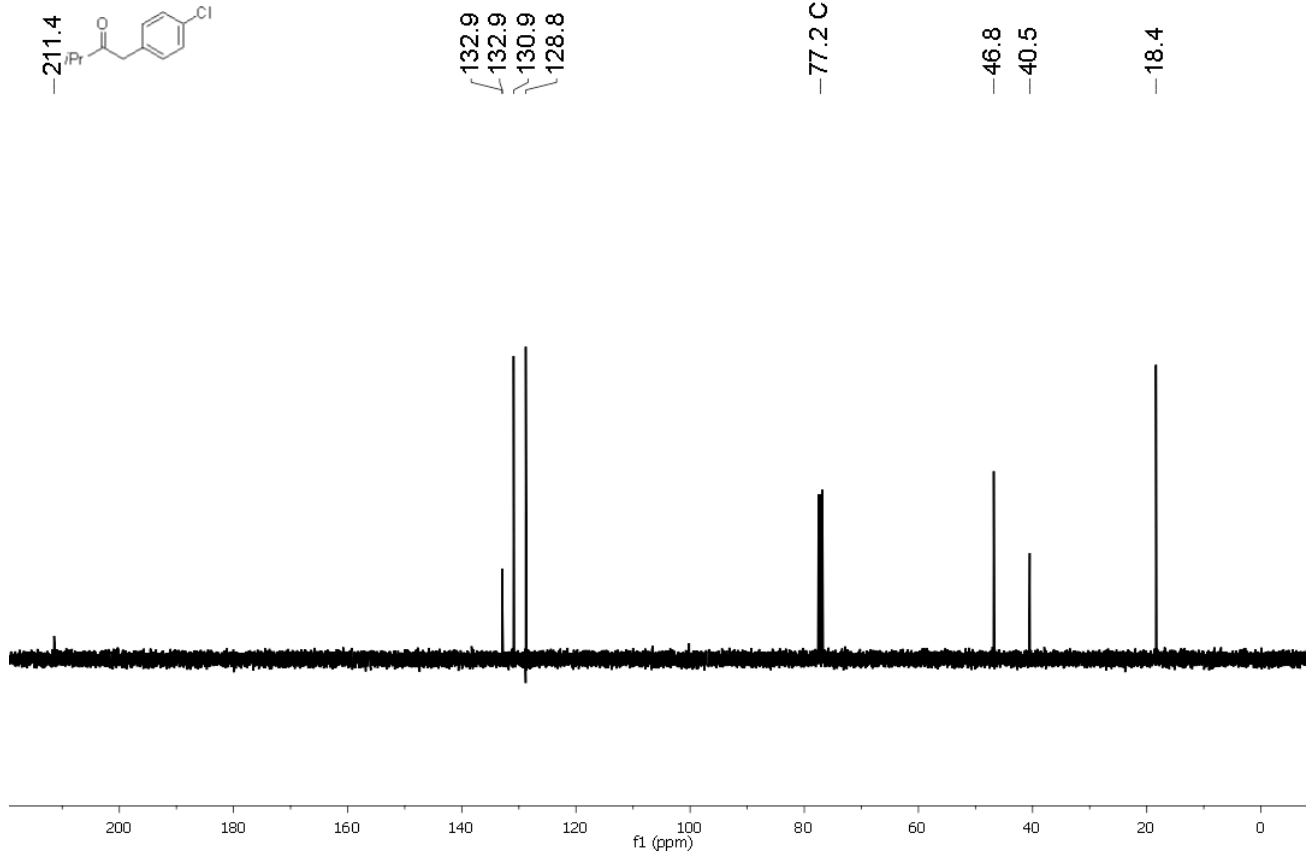

S1f (1H NMR)  
CDCl3 400 MHz

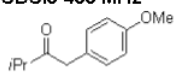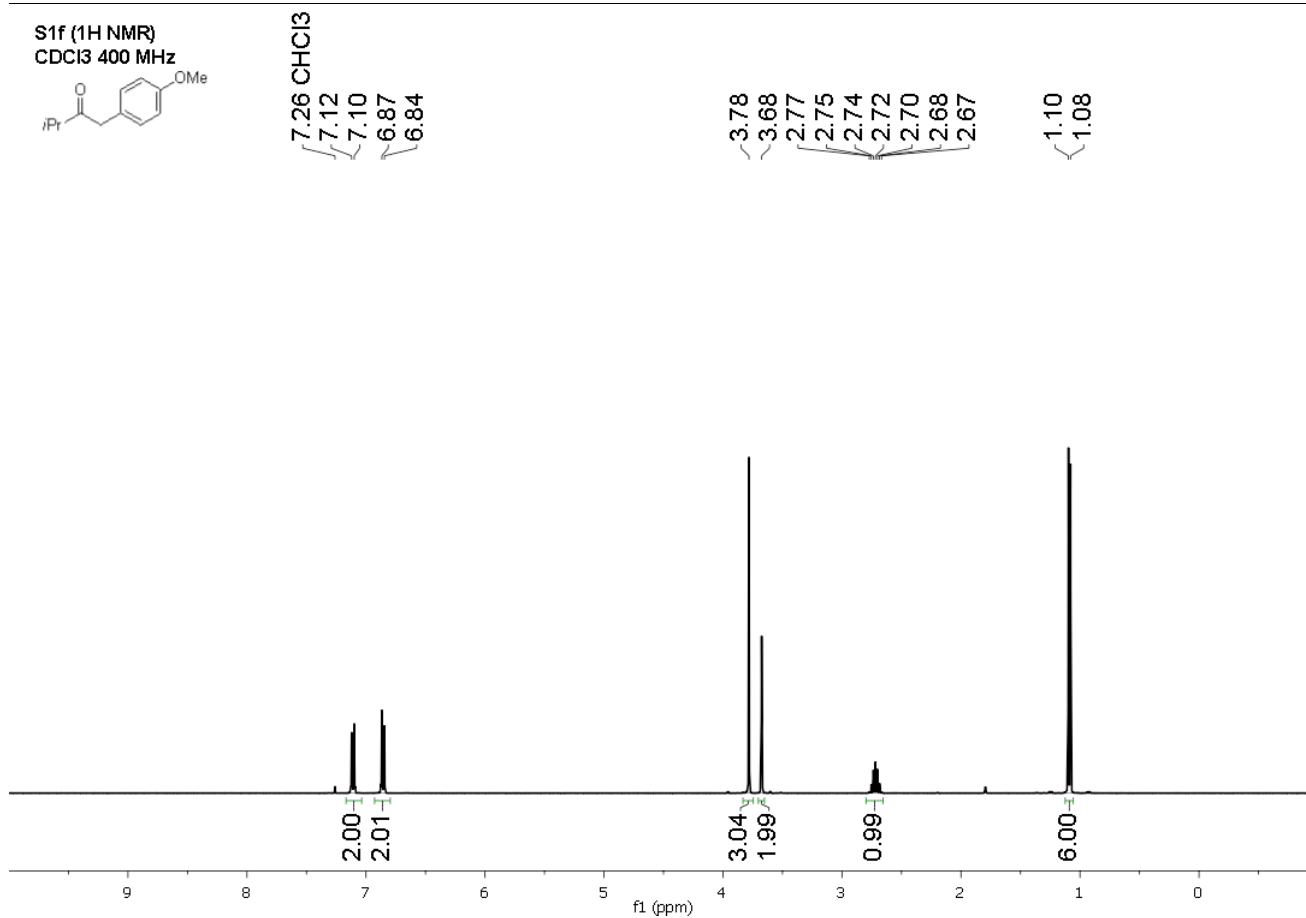

S1f (13C NMR)  
CDCl3 101 MHz

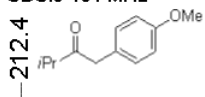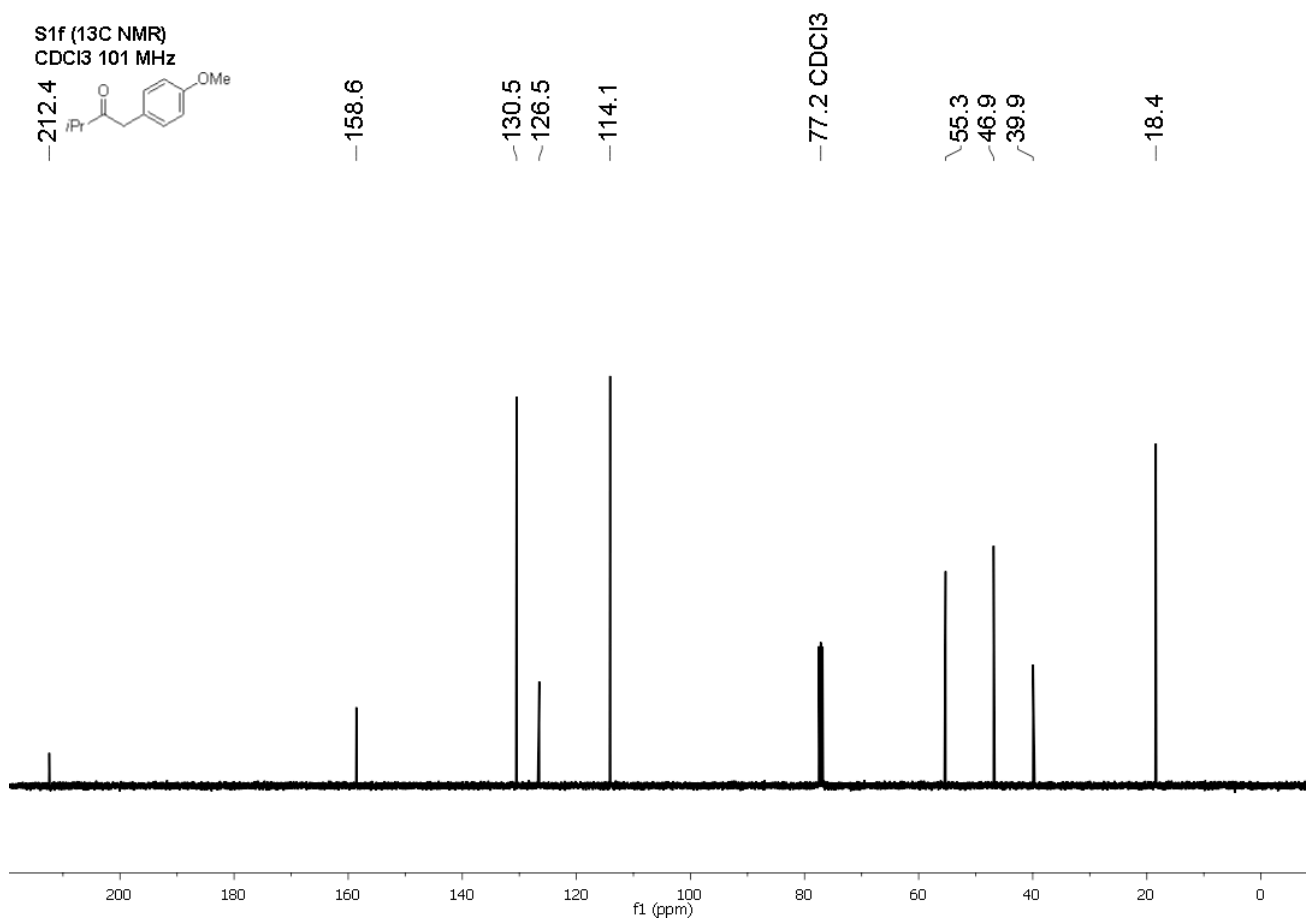

S1p (1H NMR)  
CDCl3 400 MHz

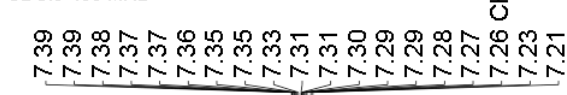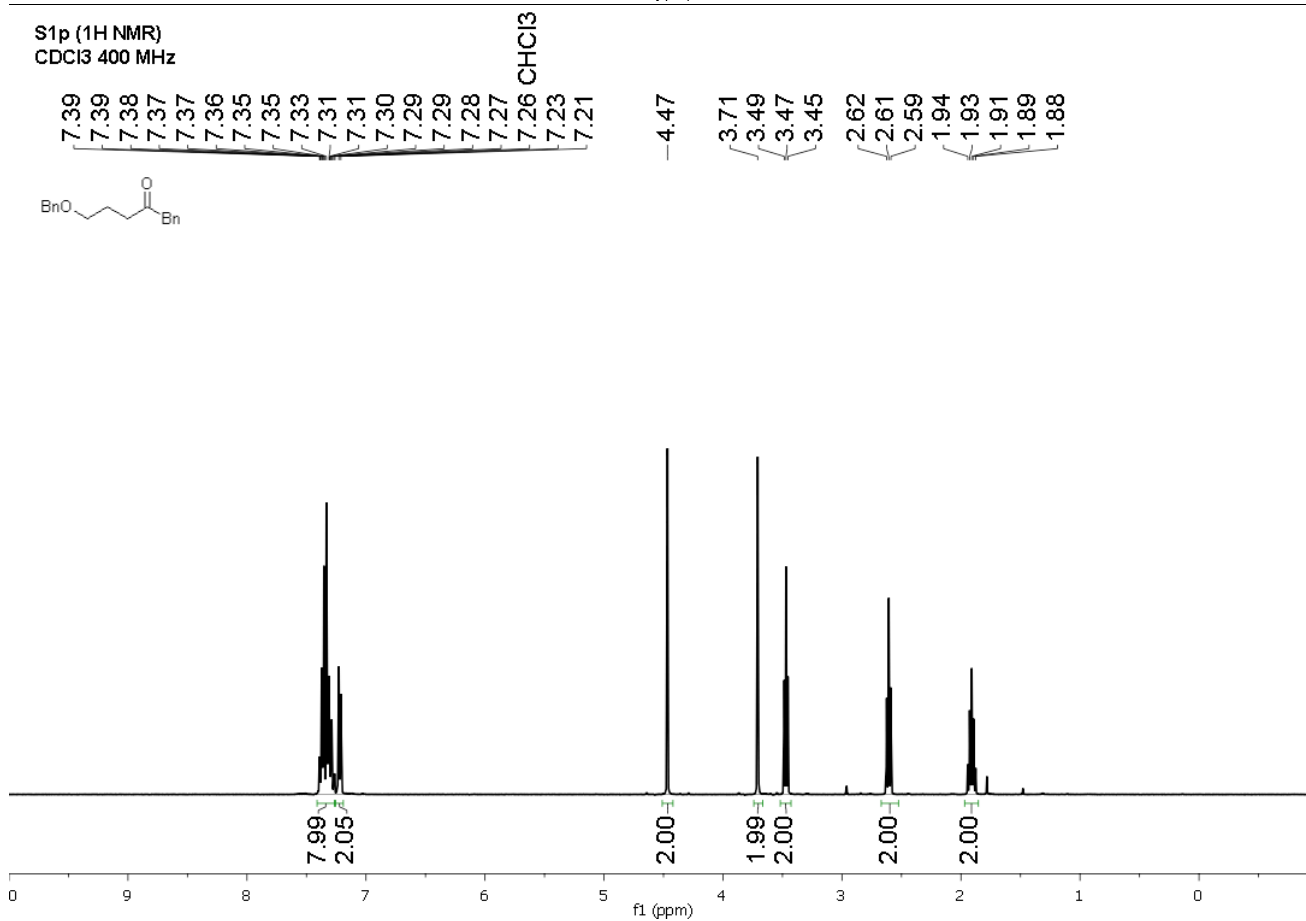



S1p (13C NMR)  
CDCl3 101 MHz

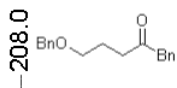

138.4  
134.4  
129.5  
128.7  
128.4  
127.7  
127.6  
127.0

77.2 CDCl3  
72.8  
69.2

50.2

38.7

23.9

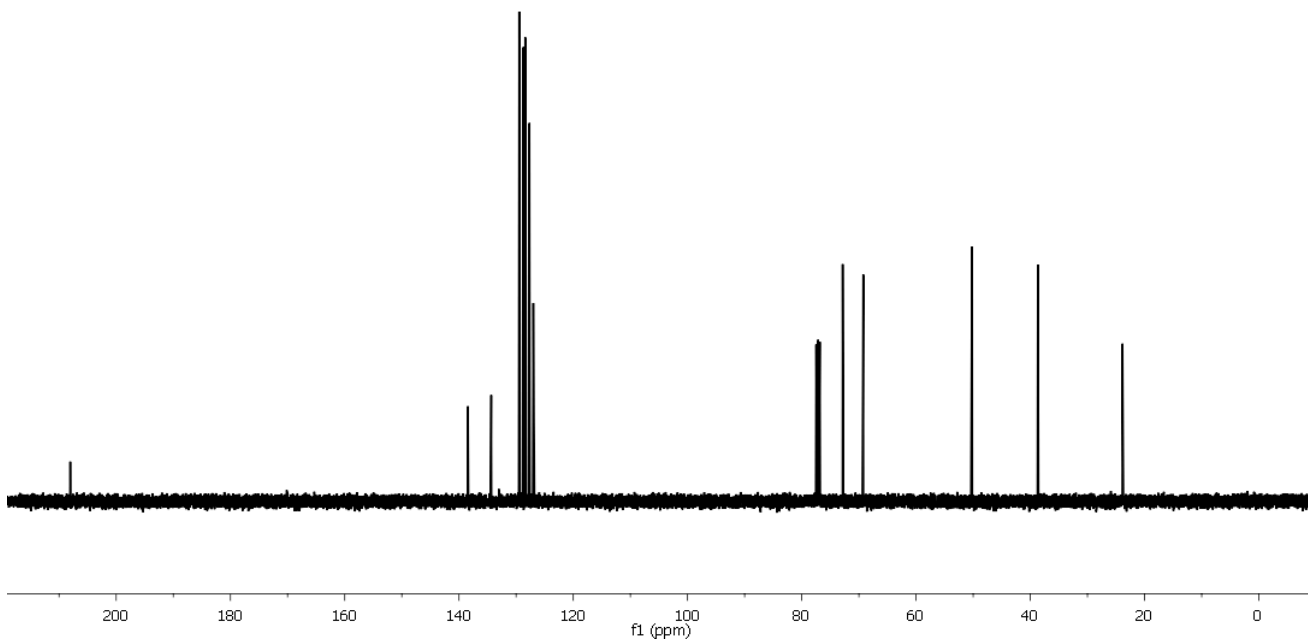

S2 (1H NMR)  
DMSO-d6 400 MHz

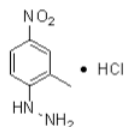

10.66

8.92  
8.09  
8.09  
8.07  
8.07  
8.01  
8.00  
7.06  
7.04

2.50 DMSO  
2.27

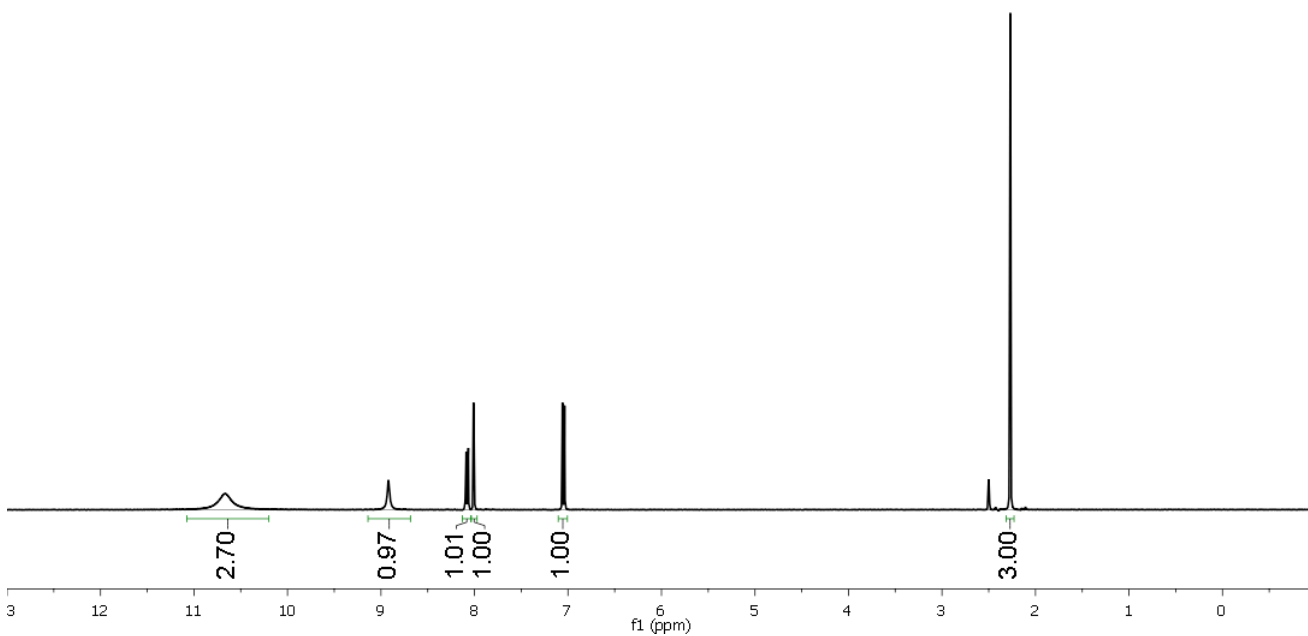

S2 (13C NMR)  
DMSO-d6 101 MHz

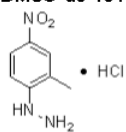

-149.4  
-140.3  
125.4  
124.5  
123.0  
-111.3

-39.5 DMSO

-17.3

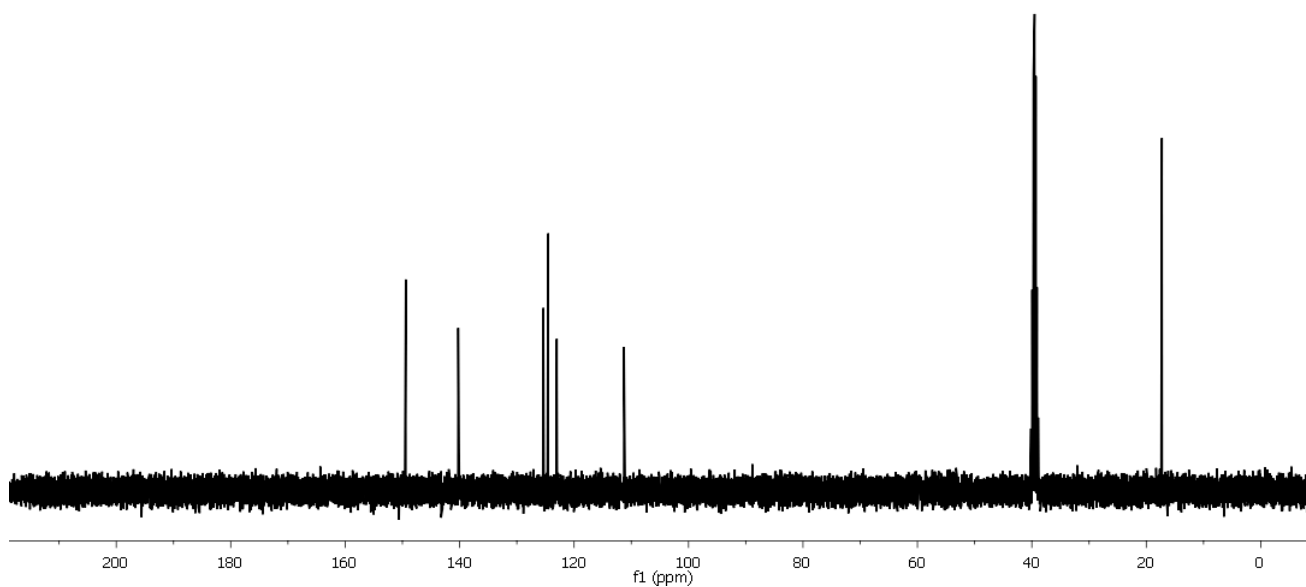

1a (1H NMR)  
CDCl3 400 MHz

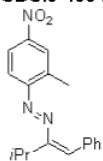

8.21  
8.21  
8.11  
8.10  
8.09  
8.08  
7.74  
7.72  
7.51  
7.49  
7.41  
7.39  
7.38  
7.26 CHCl3  
7.12

3.46  
3.45  
3.43  
3.41  
3.39  
3.38  
3.36  
-2.76

1.28  
1.26

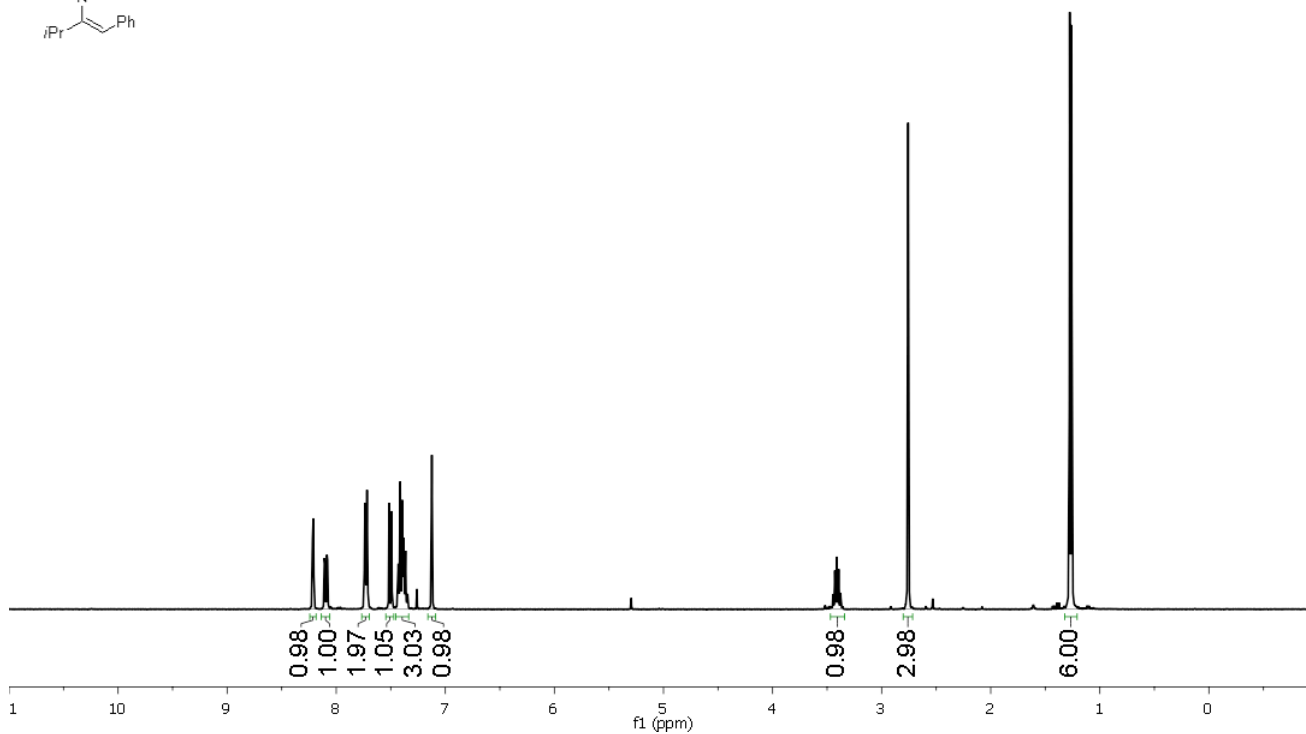

1a (<sup>13</sup>C NMR)  
CDCl<sub>3</sub> 101 MHz

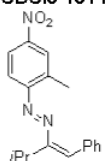

160.2  
154.5  
148.2  
139.2  
135.8  
135.2  
132.3  
128.7  
128.3  
126.4  
122.1  
116.5

-77.2 CDCl<sub>3</sub>

-27.1  
-21.7  
-17.9

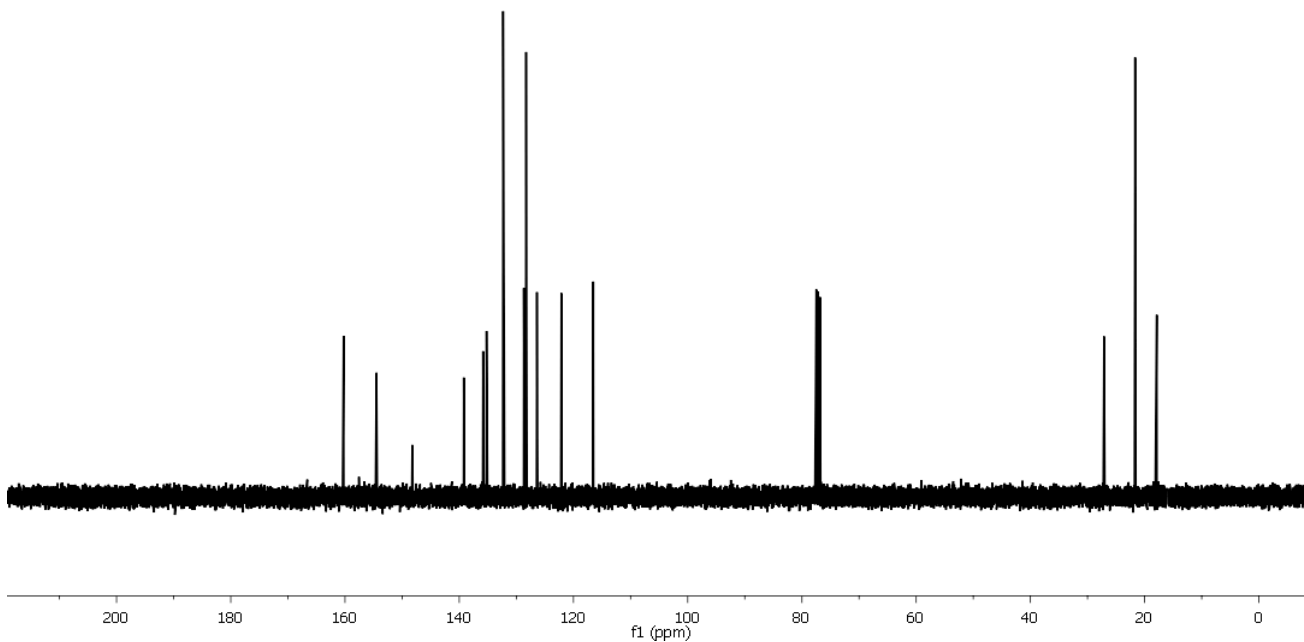

1b (<sup>1</sup>H NMR)  
CDCl<sub>3</sub> 400 MHz

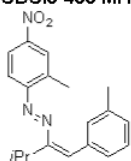

8.222  
8.216  
8.111  
8.105  
8.089  
8.083  
7.554  
7.532  
7.509  
7.325  
7.306  
7.286  
7.260 CHCl<sub>3</sub>  
7.200  
7.181  
7.102

3.460  
3.443  
3.425  
3.408  
3.391  
3.374  
3.357  
2.764  
2.404

1.270  
1.253

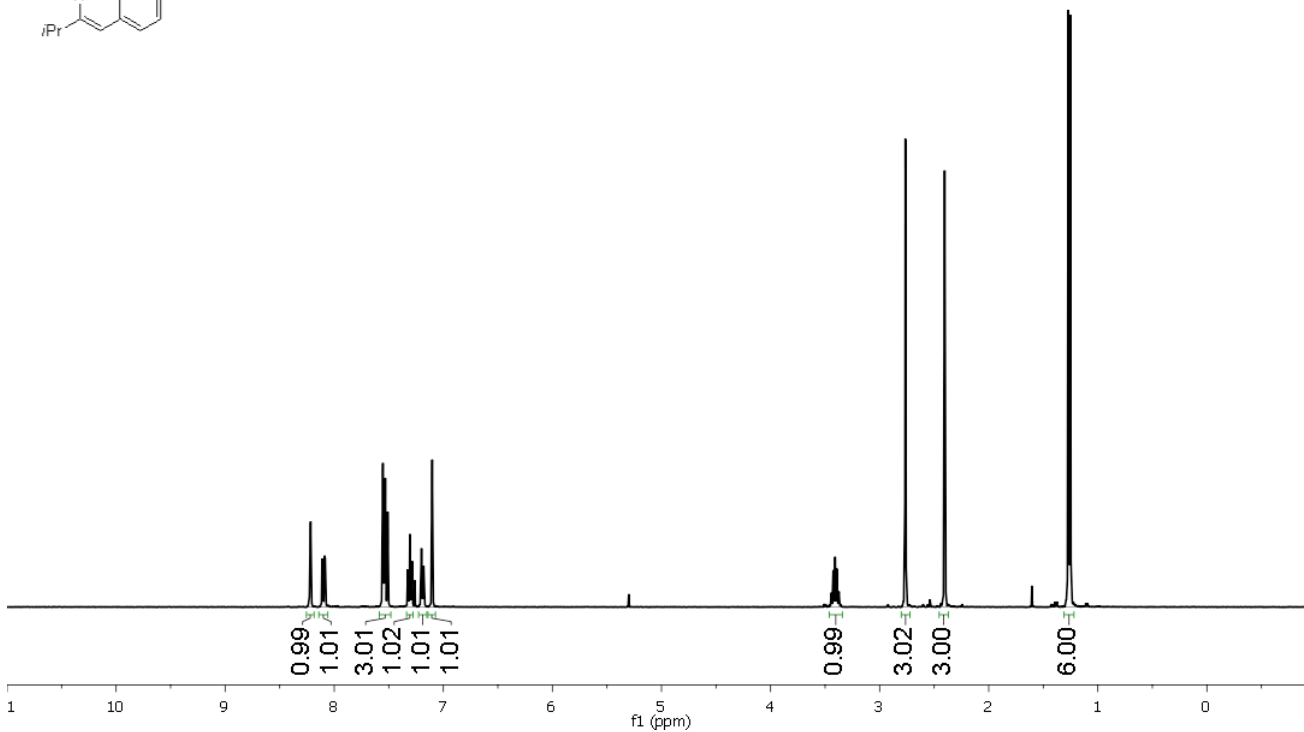

1b (13C NMR)  
CDCl3 101 MHz

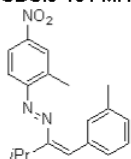

160.2  
154.5  
148.2  
139.2  
137.8  
135.8  
135.4  
133.1  
129.5  
129.5  
128.2  
126.4  
122.1  
116.5

-77.2 CDCl3

27.1  
21.7  
21.6  
17.9

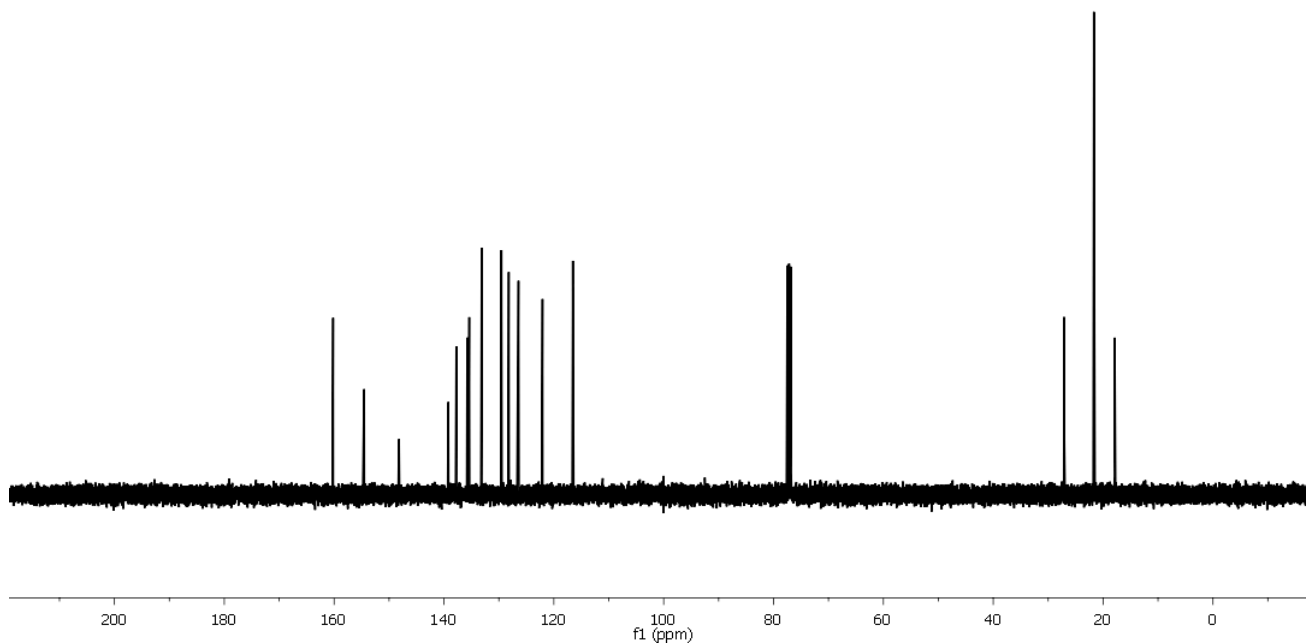

1c (1H NMR)  
CDCl3 400 MHz

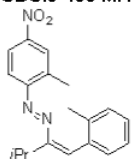

8.20  
8.20  
8.04  
8.04  
8.02  
8.01  
7.50  
7.48  
7.42  
7.40  
7.37  
7.30  
7.29  
7.27  
7.26 CHCl3  
7.26  
7.25  
7.23  
7.21  
3.47  
3.45  
3.44  
3.42  
3.40  
3.38  
3.37  
2.45  
2.45

1.31  
1.29

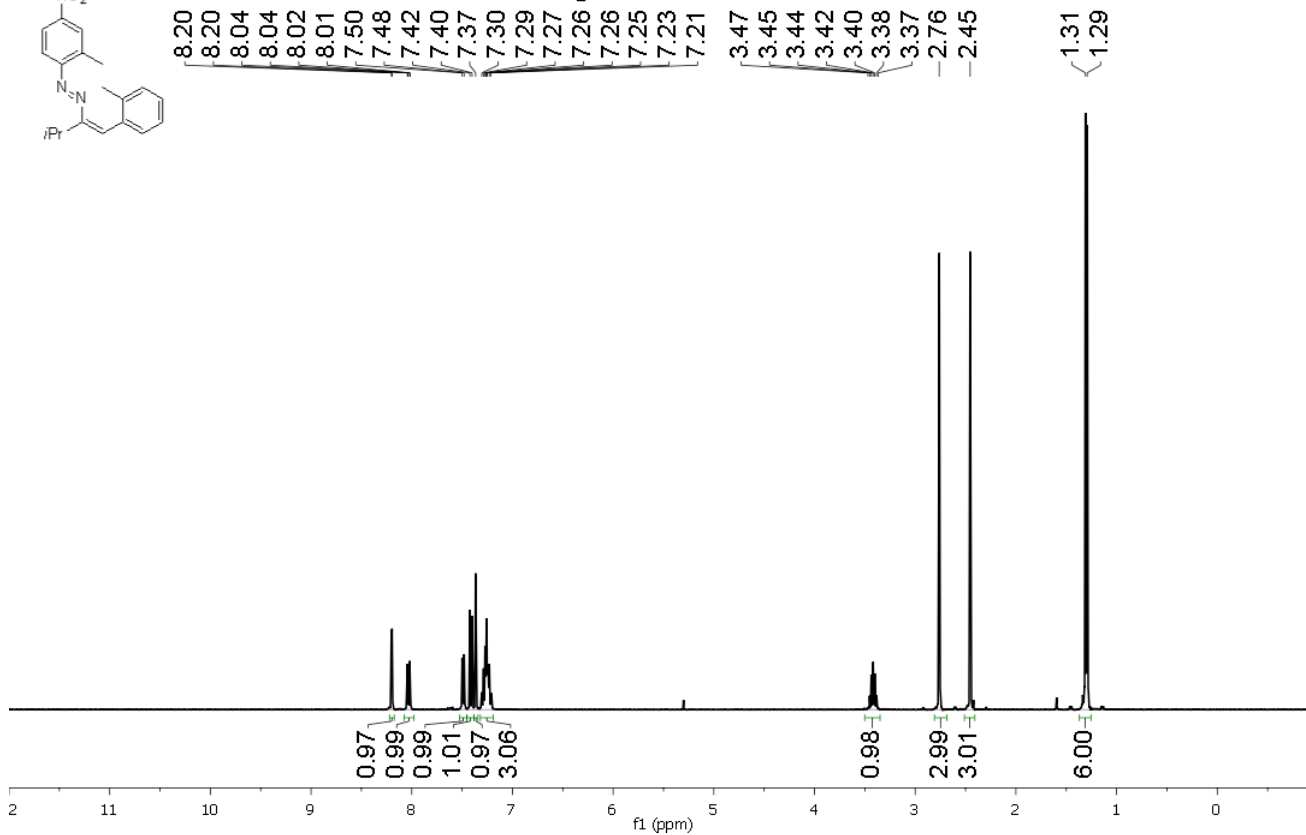

1c (<sup>13</sup>C NMR)  
CDCl<sub>3</sub> 101 MHz

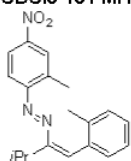

160.3  
154.3  
148.2  
139.2  
137.2  
134.6  
134.1  
133.5  
129.9  
128.6  
126.3  
125.3  
122.0  
116.5

-77.2 CDCl<sub>3</sub>

27.2  
21.8  
20.4  
17.8

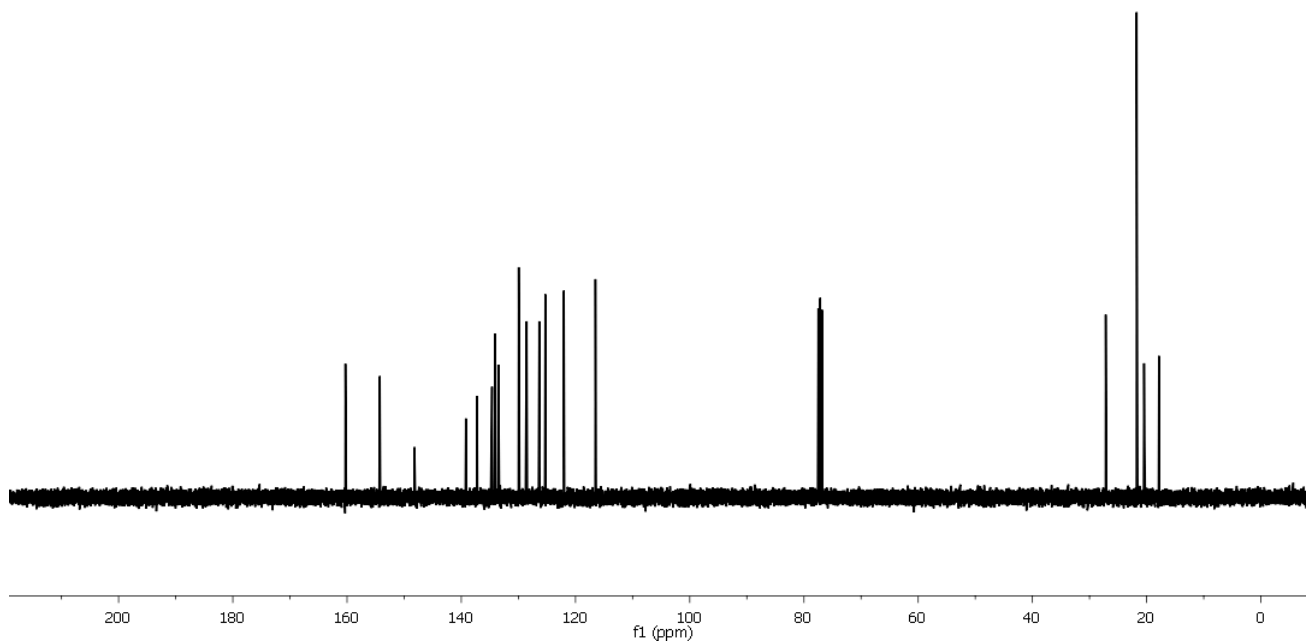

1d (<sup>1</sup>H NMR)  
CDCl<sub>3</sub> 400 MHz

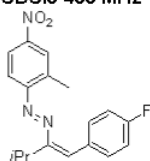

8.21  
8.20  
8.11  
8.10  
8.08  
8.08  
7.72  
7.71  
7.70  
7.69  
7.46  
7.44  
7.26 CHCl<sub>3</sub>  
7.11  
7.09  
7.06  
7.06

3.44  
3.42  
3.40  
3.38  
3.37  
3.35  
3.33  
2.74

1.25  
1.24

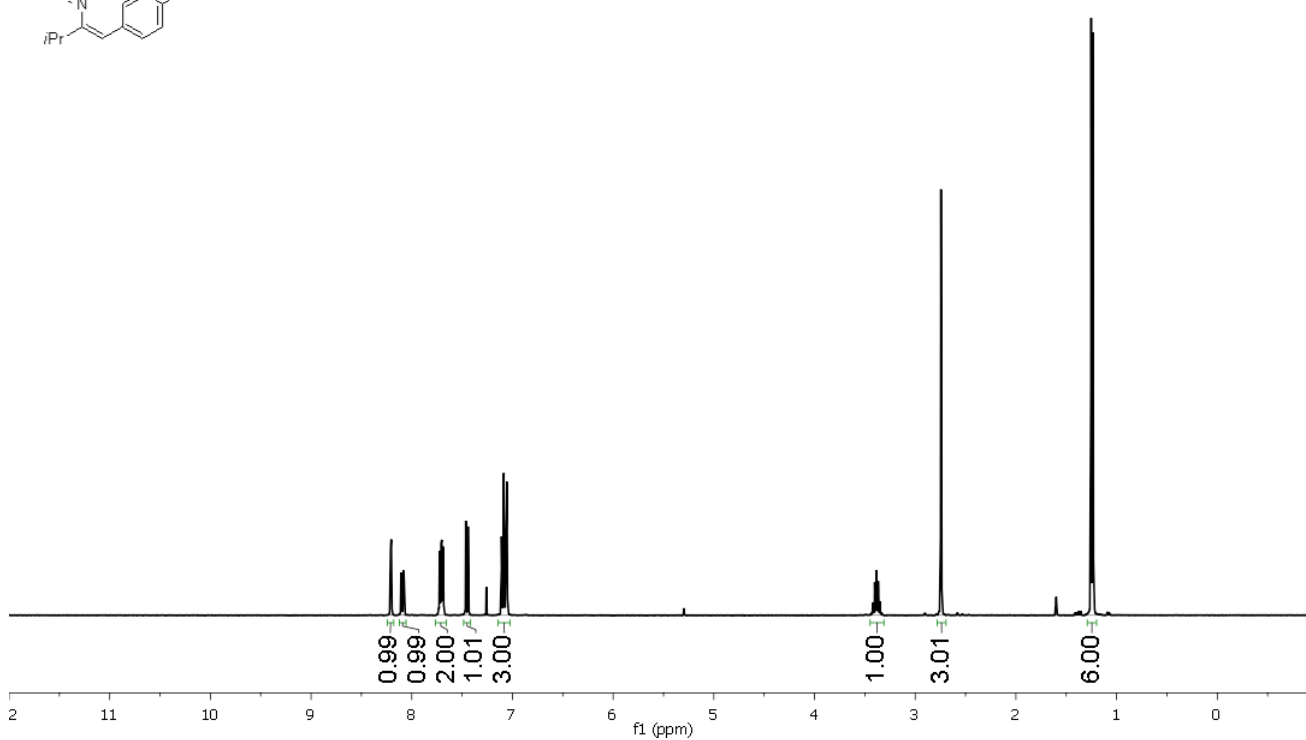

1d (13C NMR)  
CDCl3 101 MHz

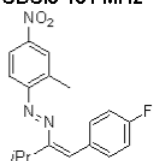

164.4  
161.9  
160.0  
154.5  
148.3  
139.2  
134.2  
134.1  
134.0  
134.0  
132.1  
132.0  
126.5  
122.2  
116.4  
115.5  
115.3

-77.2 CDCl3

-27.1  
-21.7  
-17.9

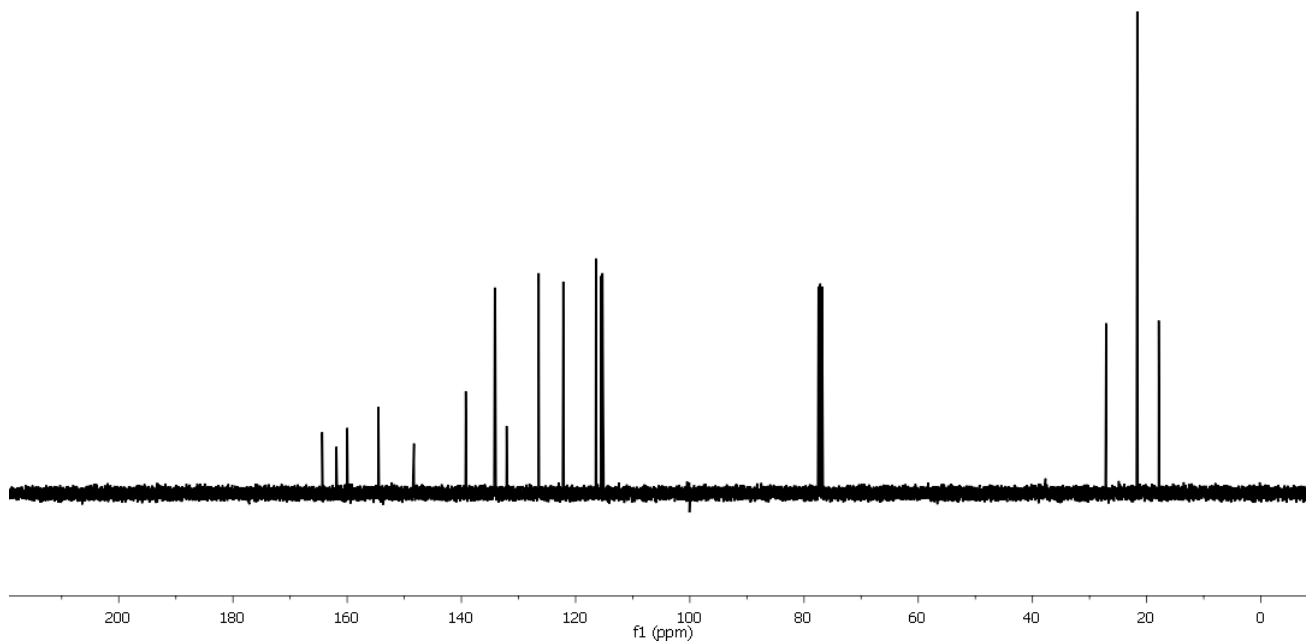

1d (19F NMR)  
CDCl3 376 MHz

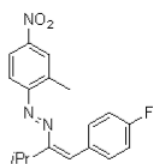

-111.19  
-111.21  
-111.22  
-111.22  
-111.23  
-111.24  
-111.25  
-111.25  
-111.27

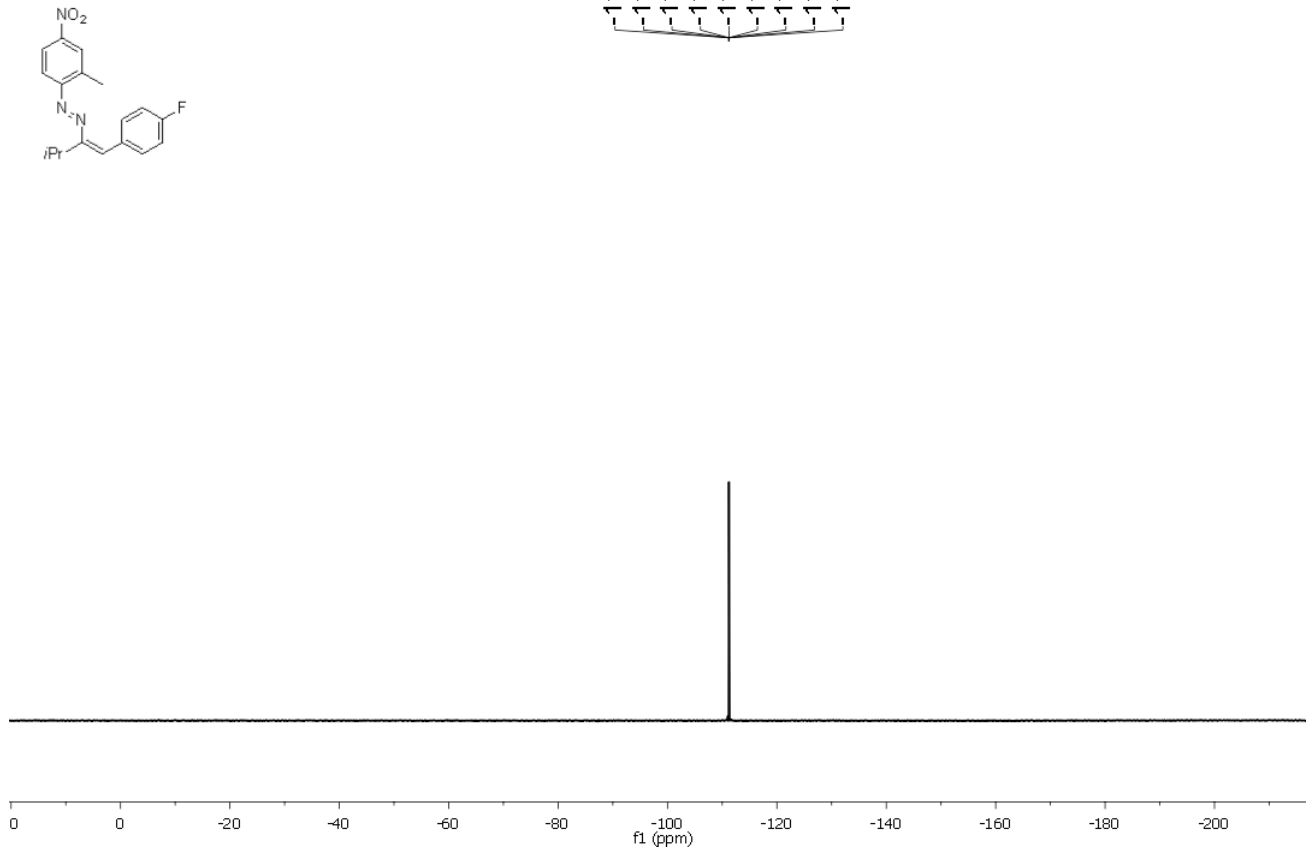

1e (1H NMR)  
CDCl3 400 MHz

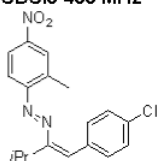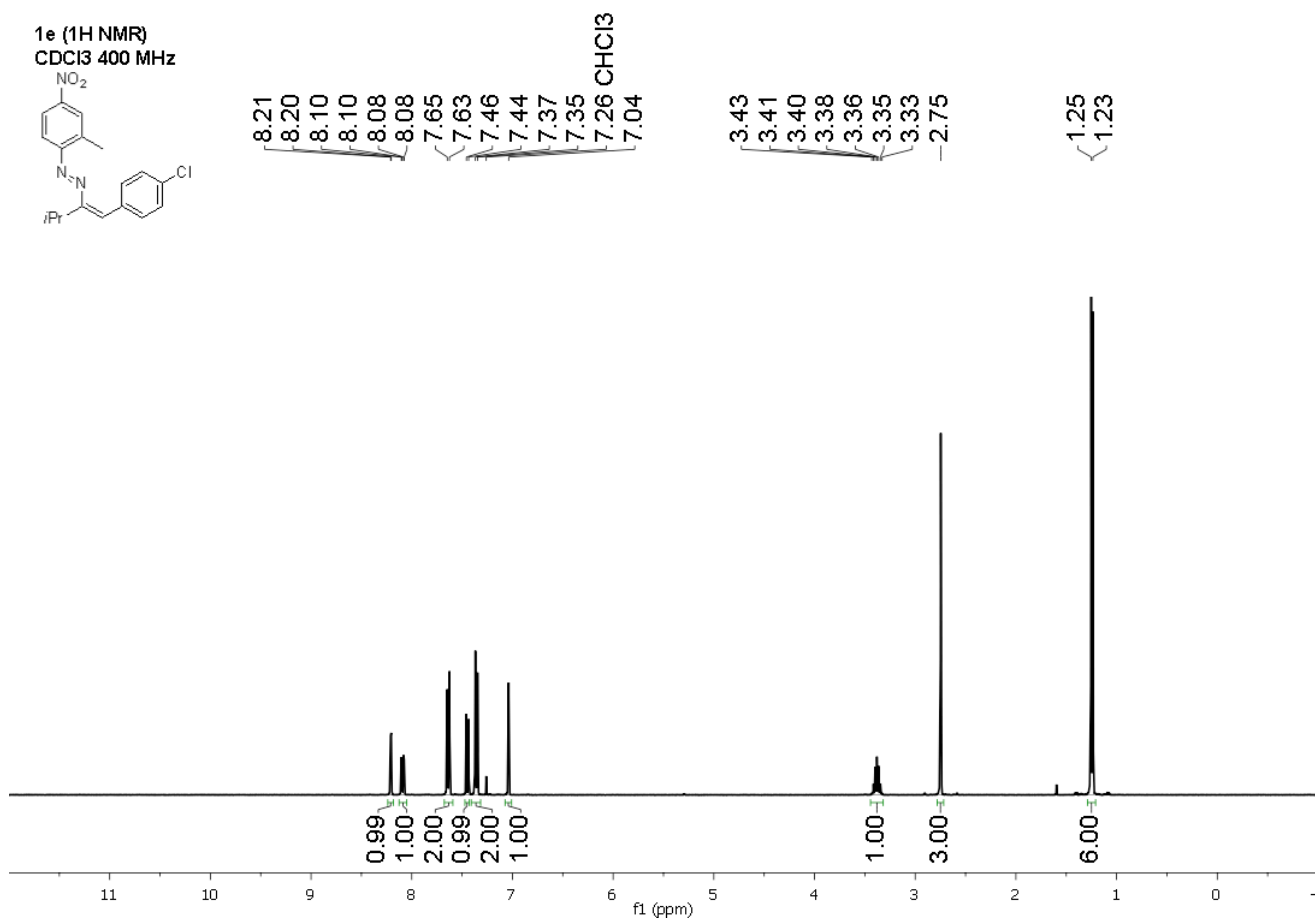

1e (13C NMR)  
CDCl3 101 MHz

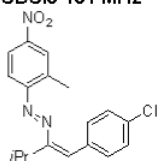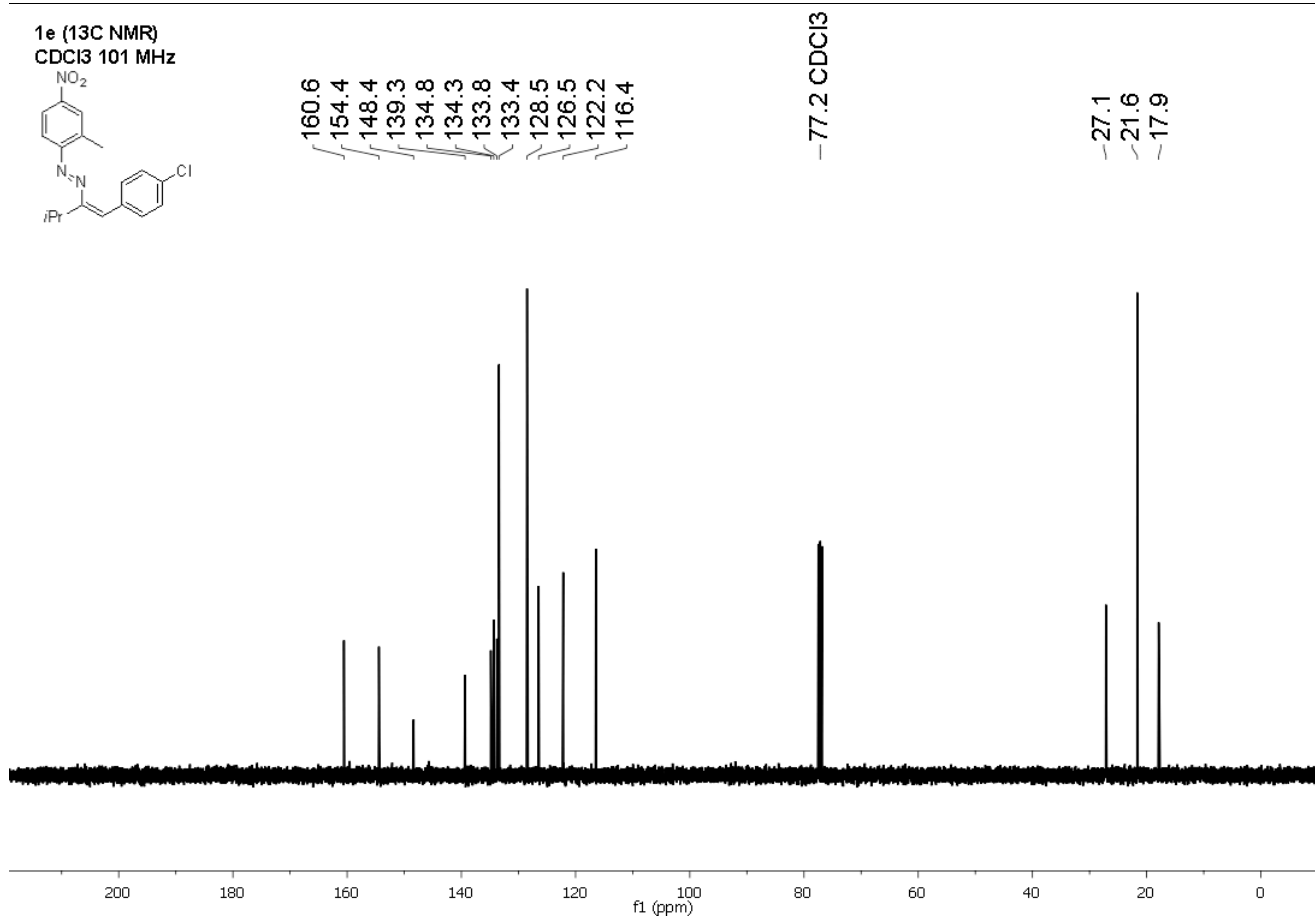

1f (1H NMR)  
CDCl3 400 MHz

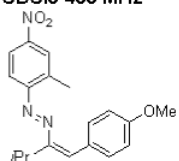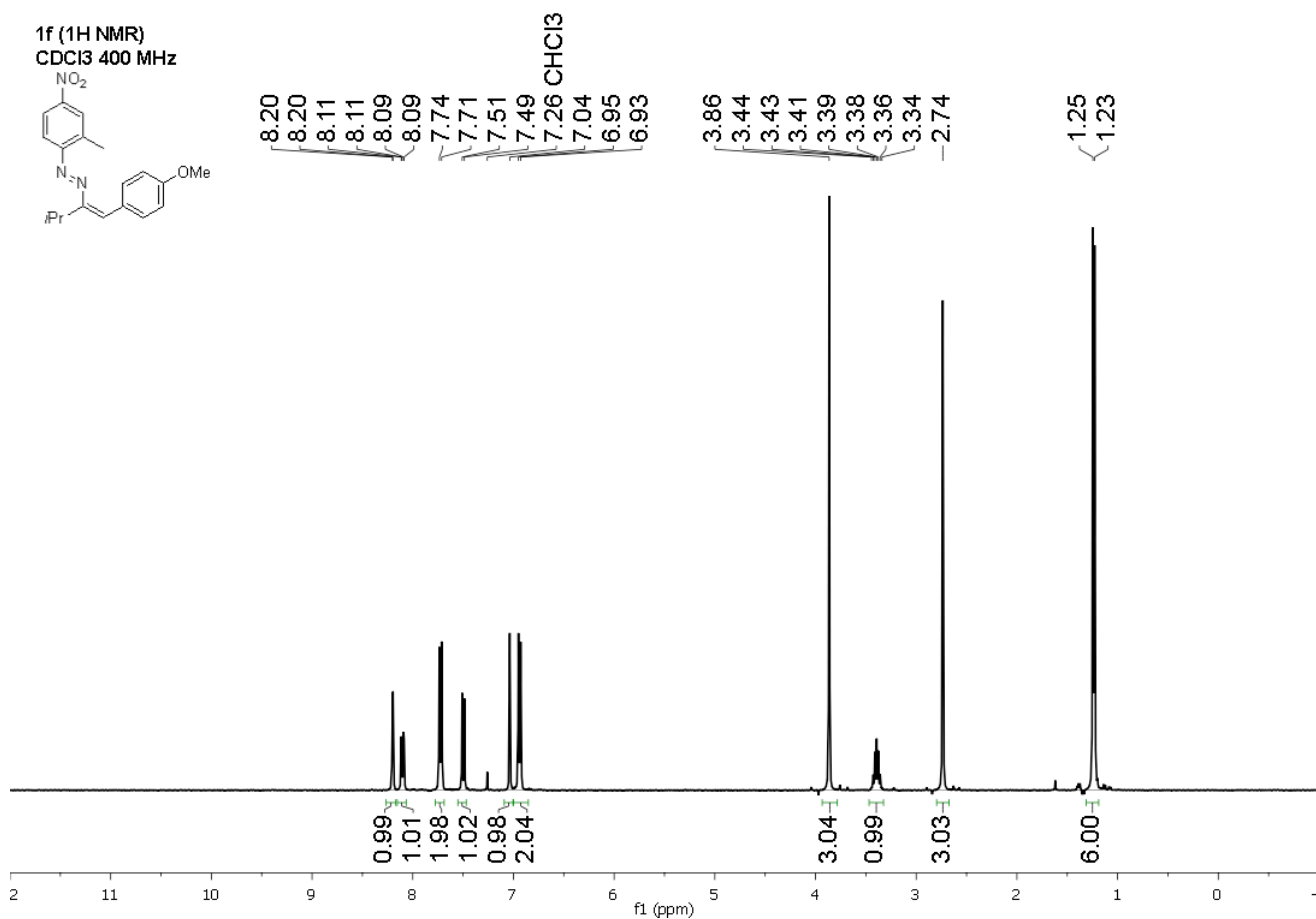

1f (13C NMR)  
CDCl3 101 MHz

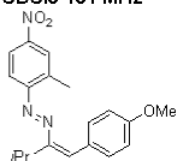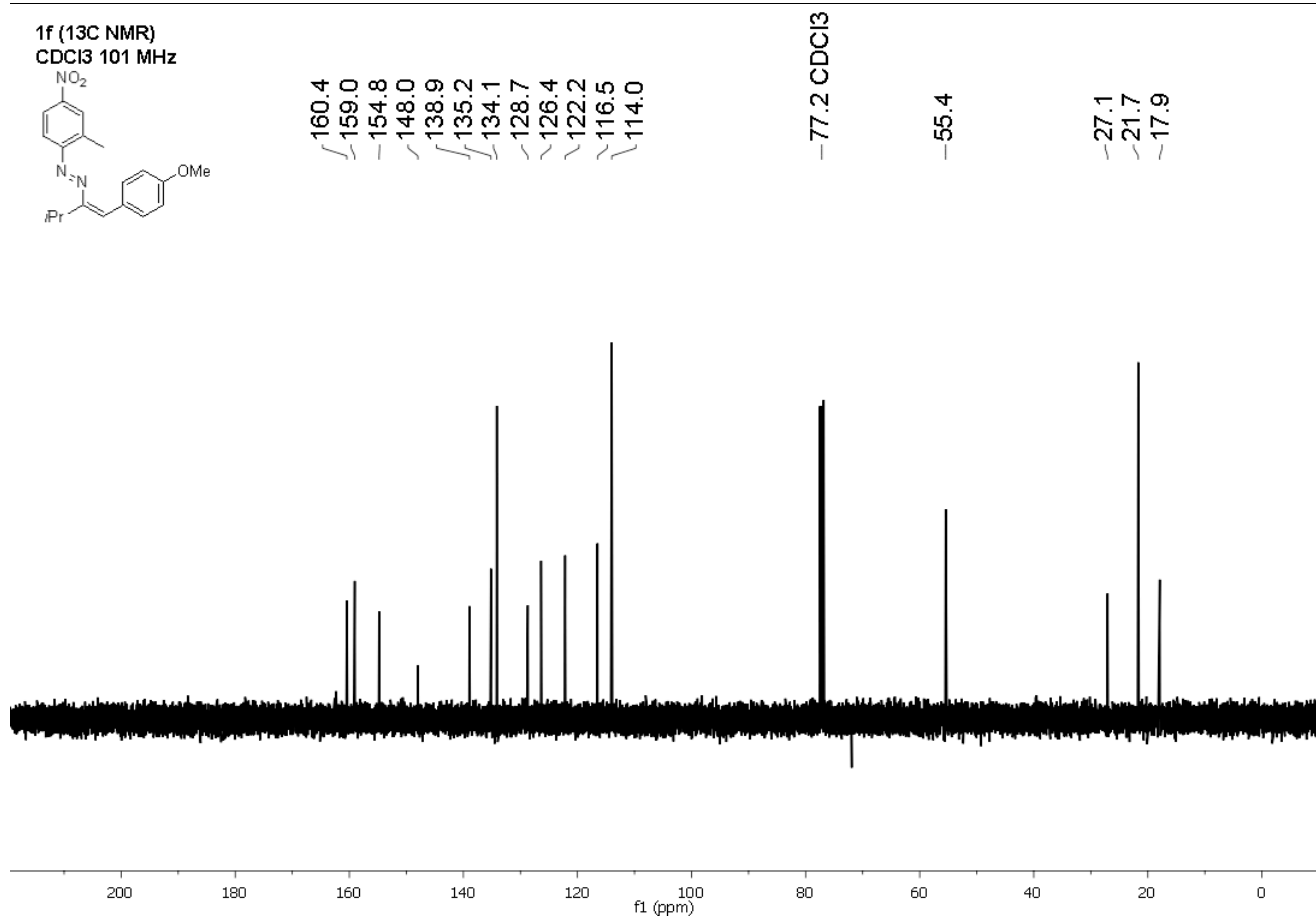



1n (1H NMR)  
CDCl3 400 MHz

8.42  
8.30  
8.28  
7.83  
7.81  
7.26 CHCl3  
7.14  
7.13  
7.12

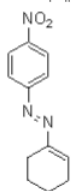

2.54  
2.53  
2.52  
2.52  
2.42  
2.40  
2.39  
1.81  
1.80  
1.79  
1.78  
1.78  
1.77  
1.76  
1.75  
1.74  
1.73  
1.73  
1.72  
1.70

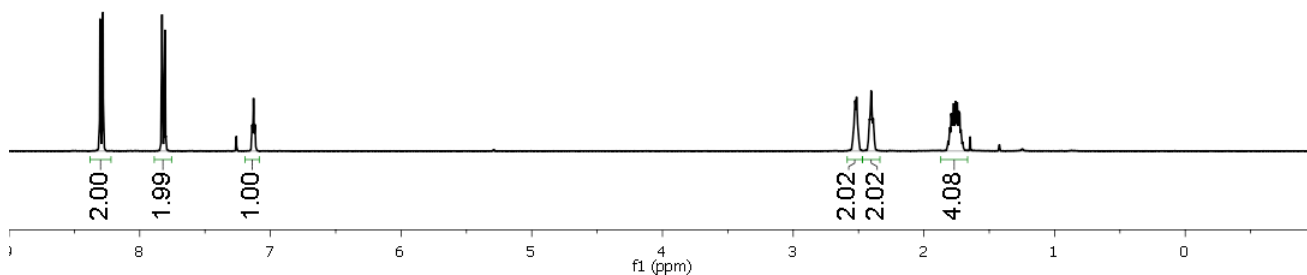

1n (13C NMR)  
CDCl3 101 MHz

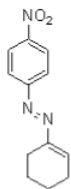

156.3  
156.3  
148.1  
146.5

124.7  
123.0

-77.2 CHCl3

26.9  
22.8  
22.2  
21.9

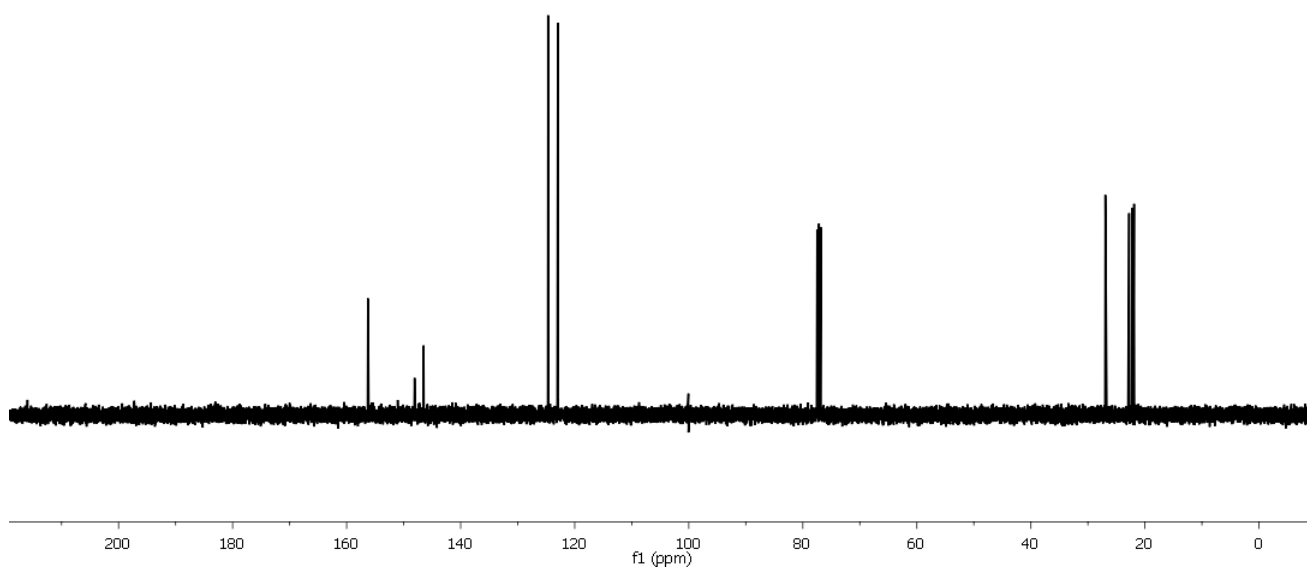

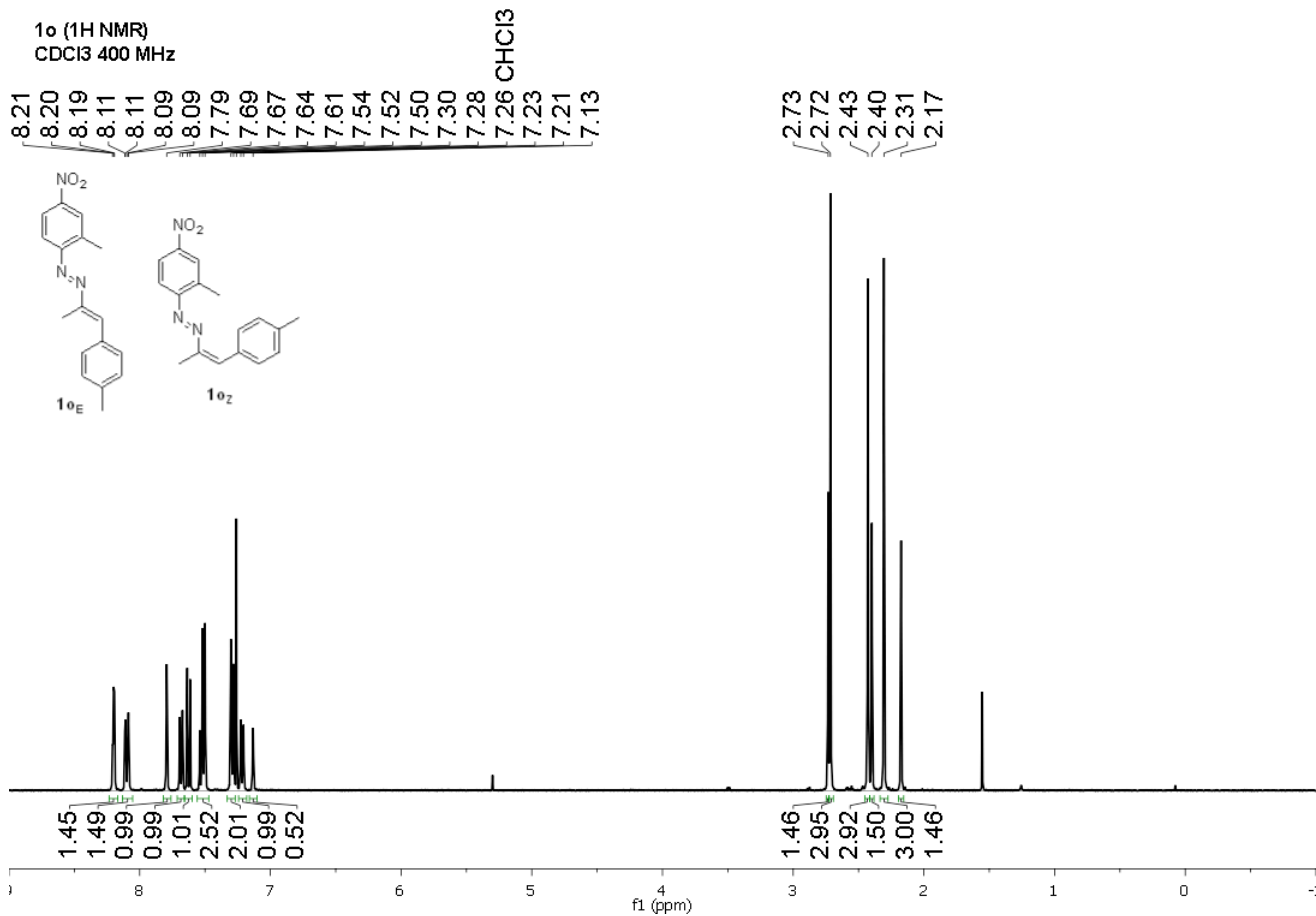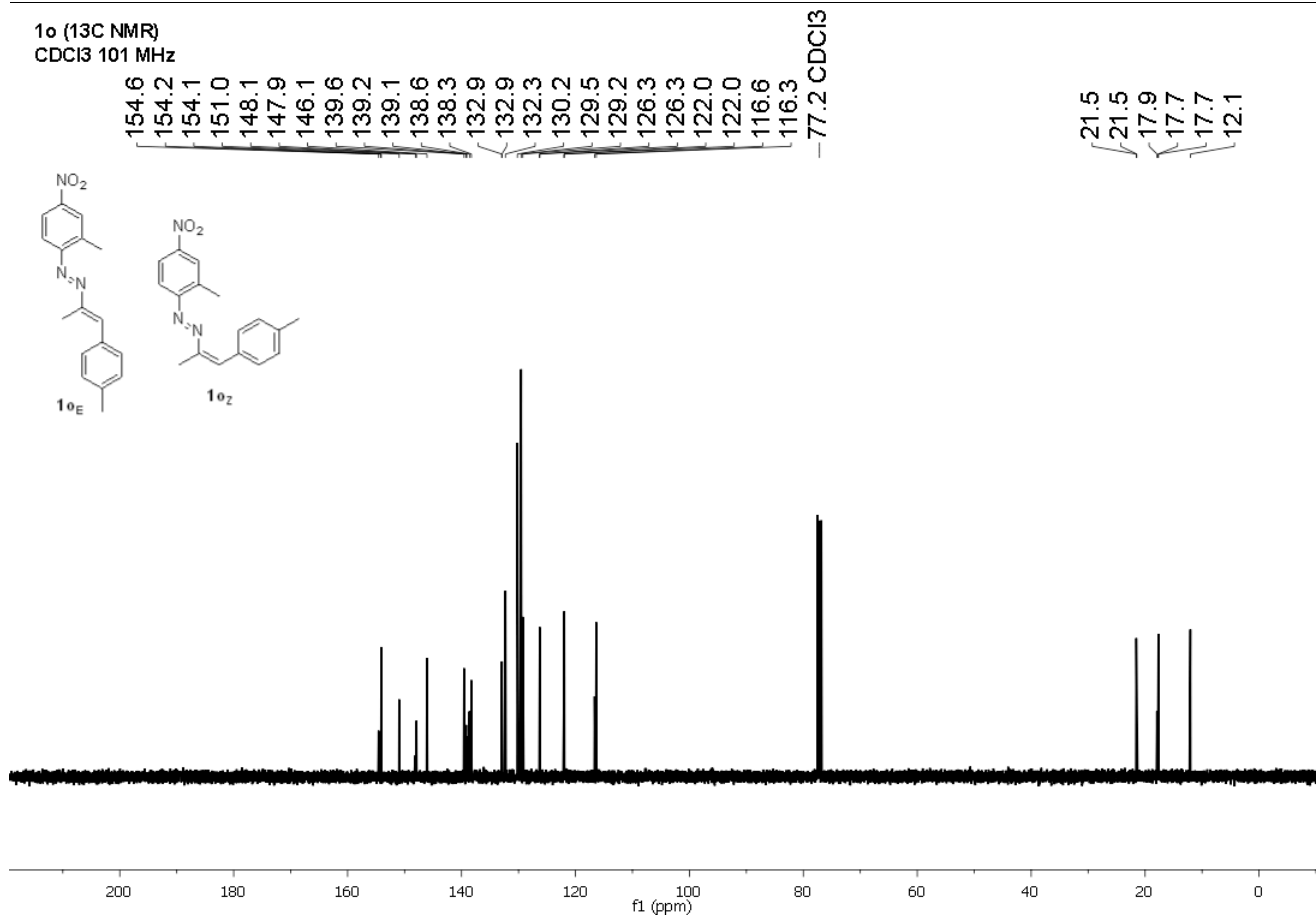

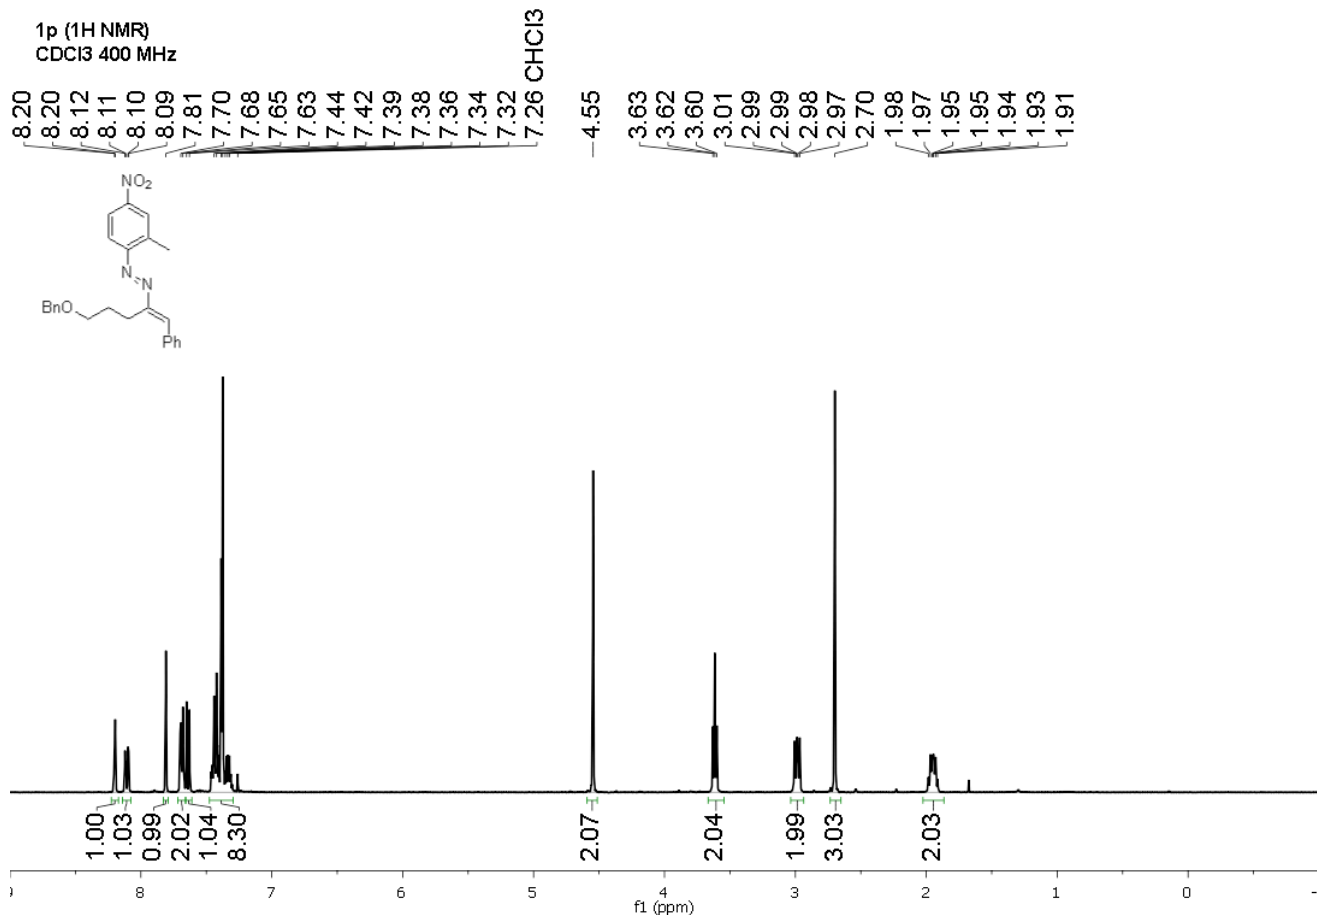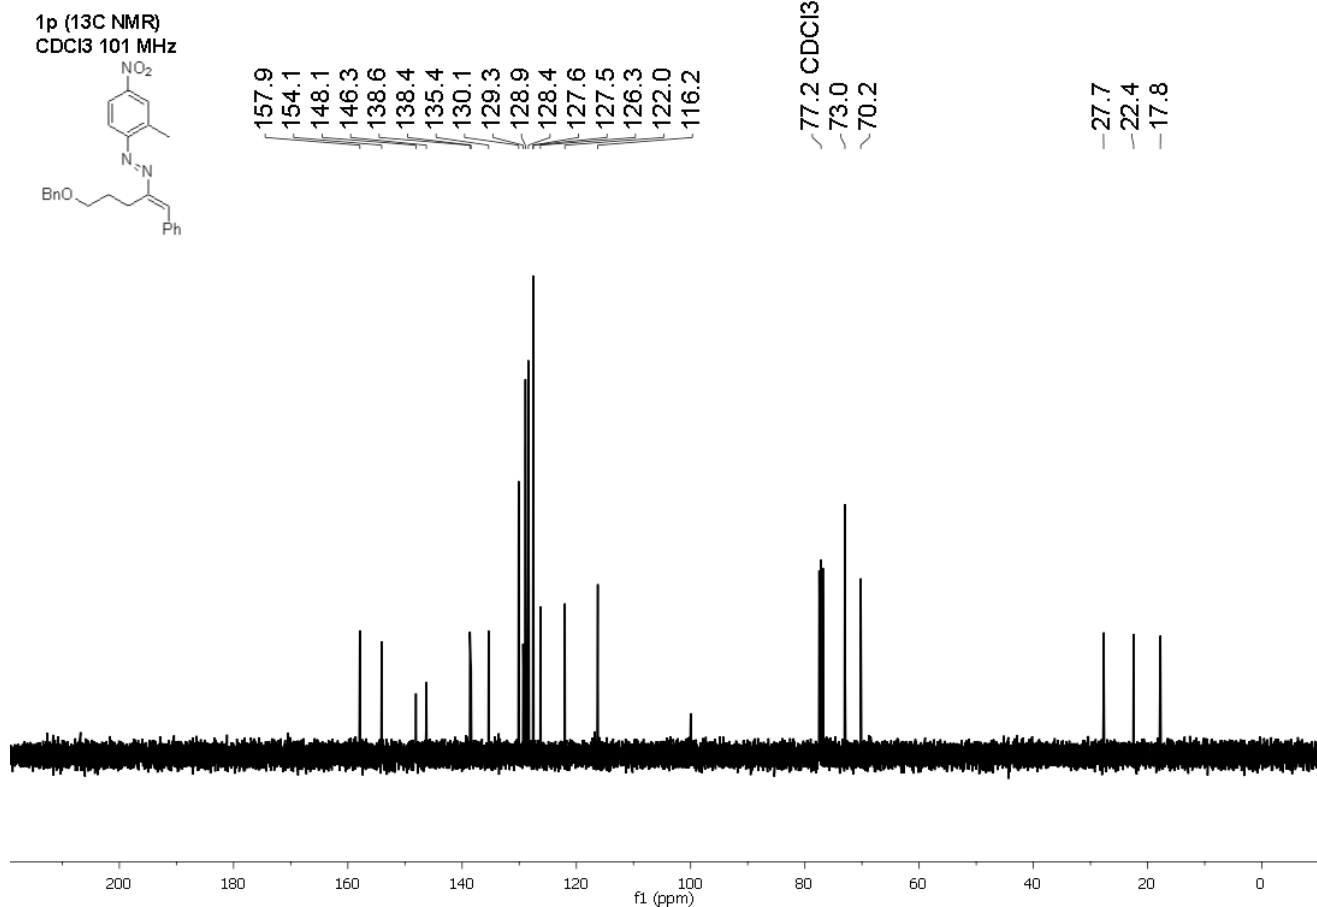

2a (1H NMR)  
CDCl3 400 MHz

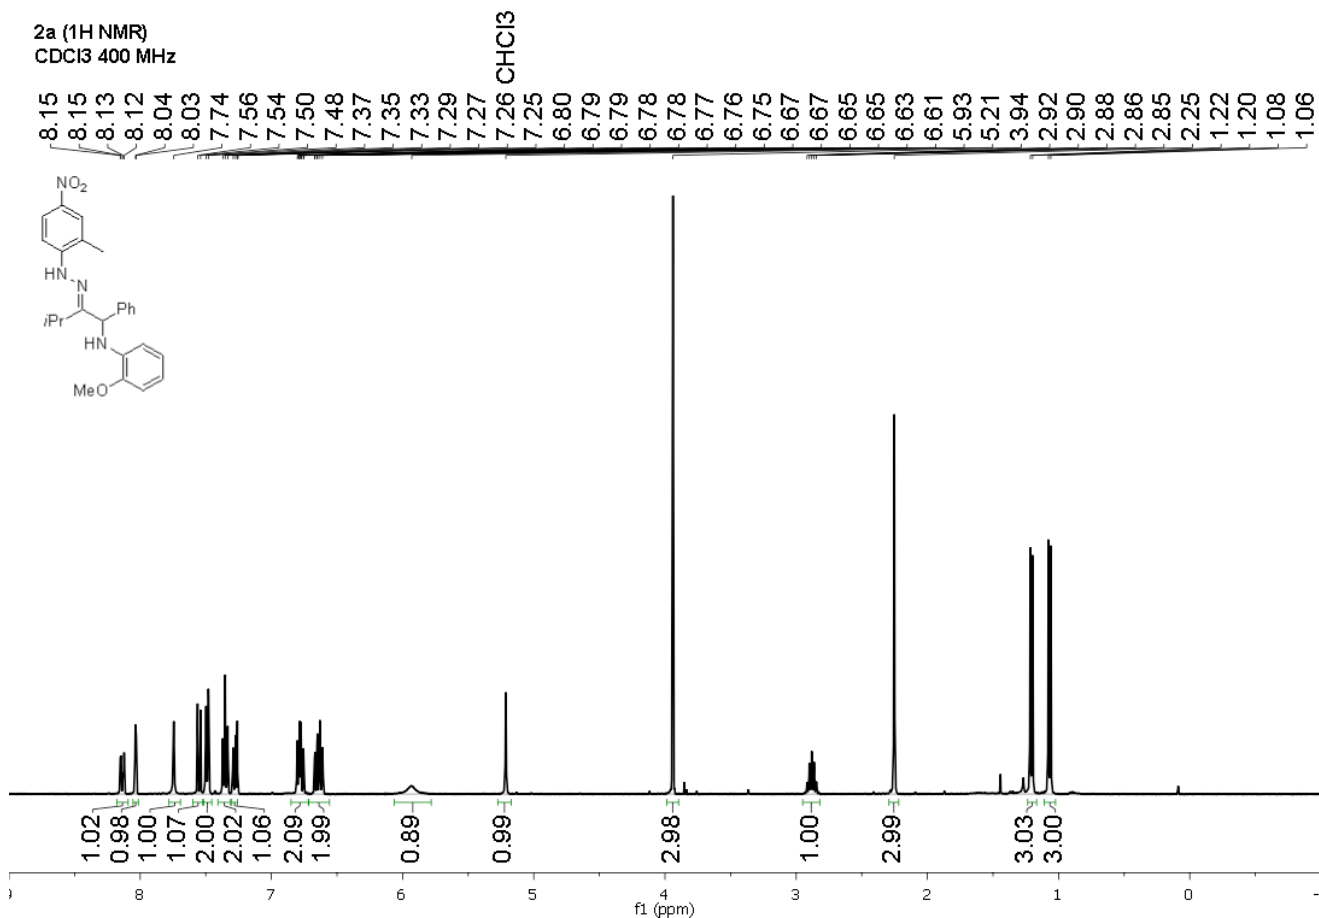

2a (13C NMR)  
CDCl3 101 MHz

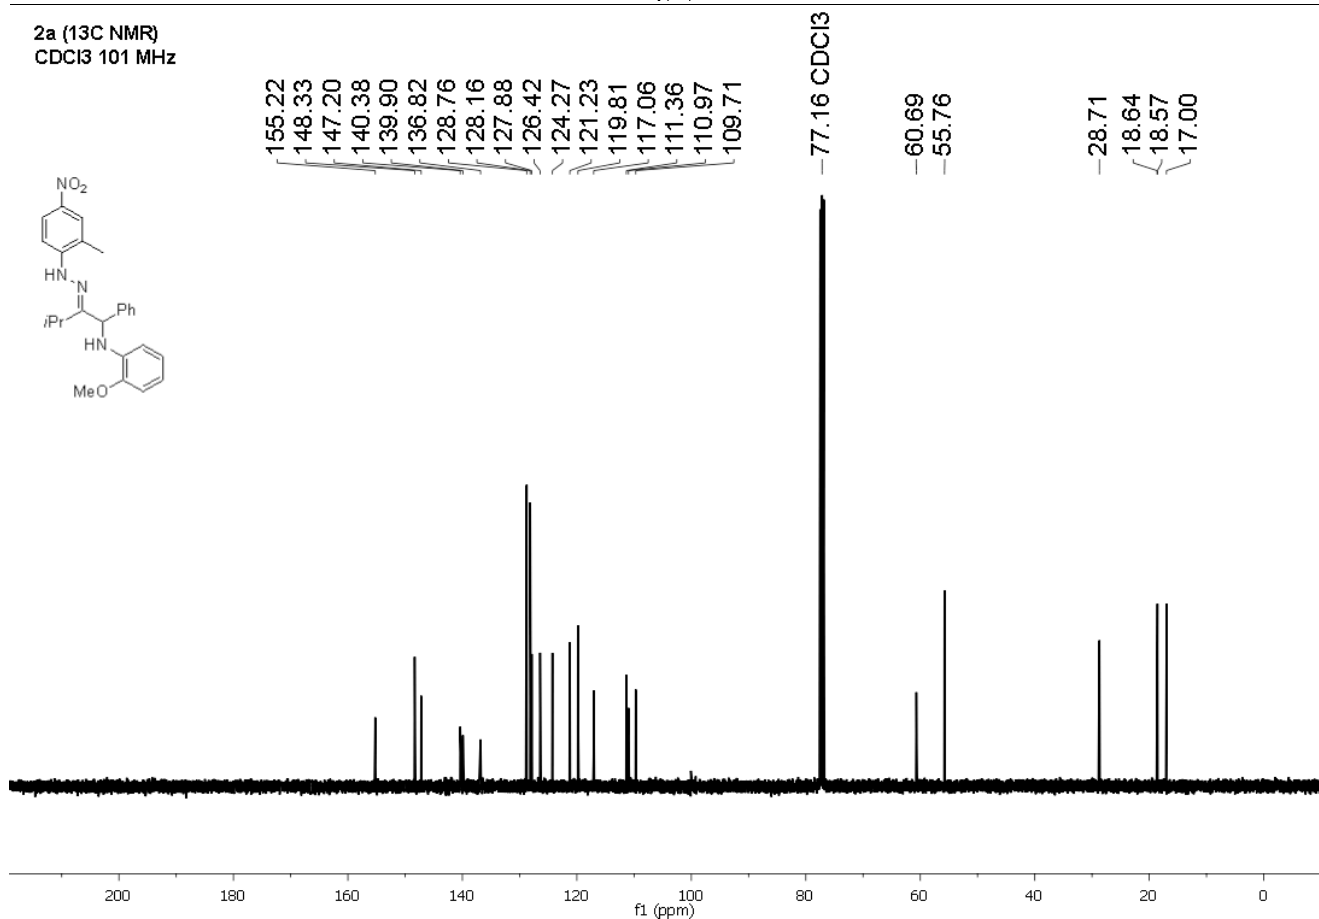

2b (1H NMR)  
CDCl3 400 MHz

8.15  
8.15  
8.13  
8.13  
8.04  
8.03  
7.75  
7.57  
7.54  
7.30  
7.28  
7.26 CHCl3  
7.24  
7.22  
7.10  
7.08  
6.81  
6.79  
6.77  
6.67  
6.65  
6.65  
6.63  
5.93  
5.16  
3.94  
2.93  
2.91  
2.89  
2.87  
2.86  
2.84  
2.82  
2.36  
2.26  
1.21  
1.19  
1.08  
1.07

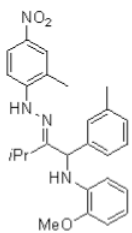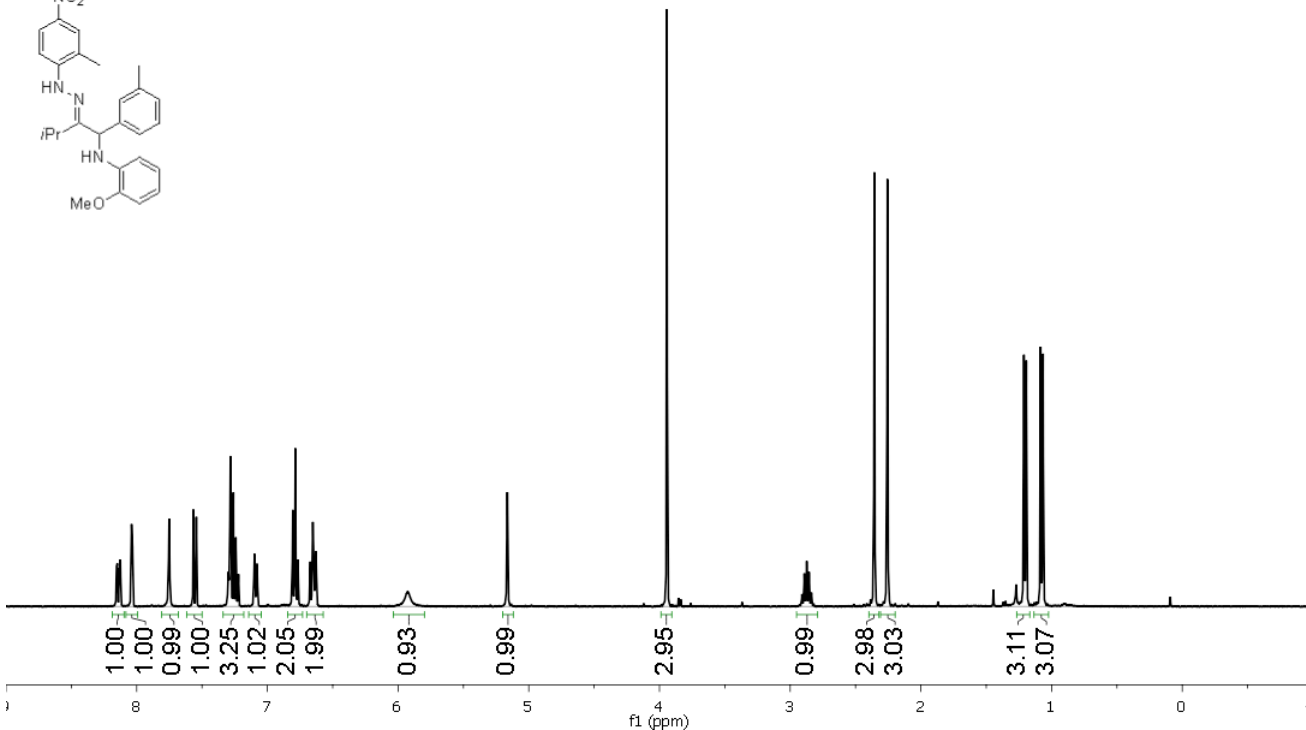

2b (13C NMR)  
CDCl3 101 MHz

155.24  
148.37  
147.16  
140.23  
139.81  
138.43  
136.93  
128.76  
128.70  
128.59  
126.42  
125.30  
124.27  
121.22  
119.77  
117.01  
111.32  
110.94  
109.64  
-77.16 CDCl3  
-60.81  
-55.74  
28.72  
21.64  
18.64  
18.58  
17.01

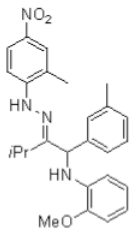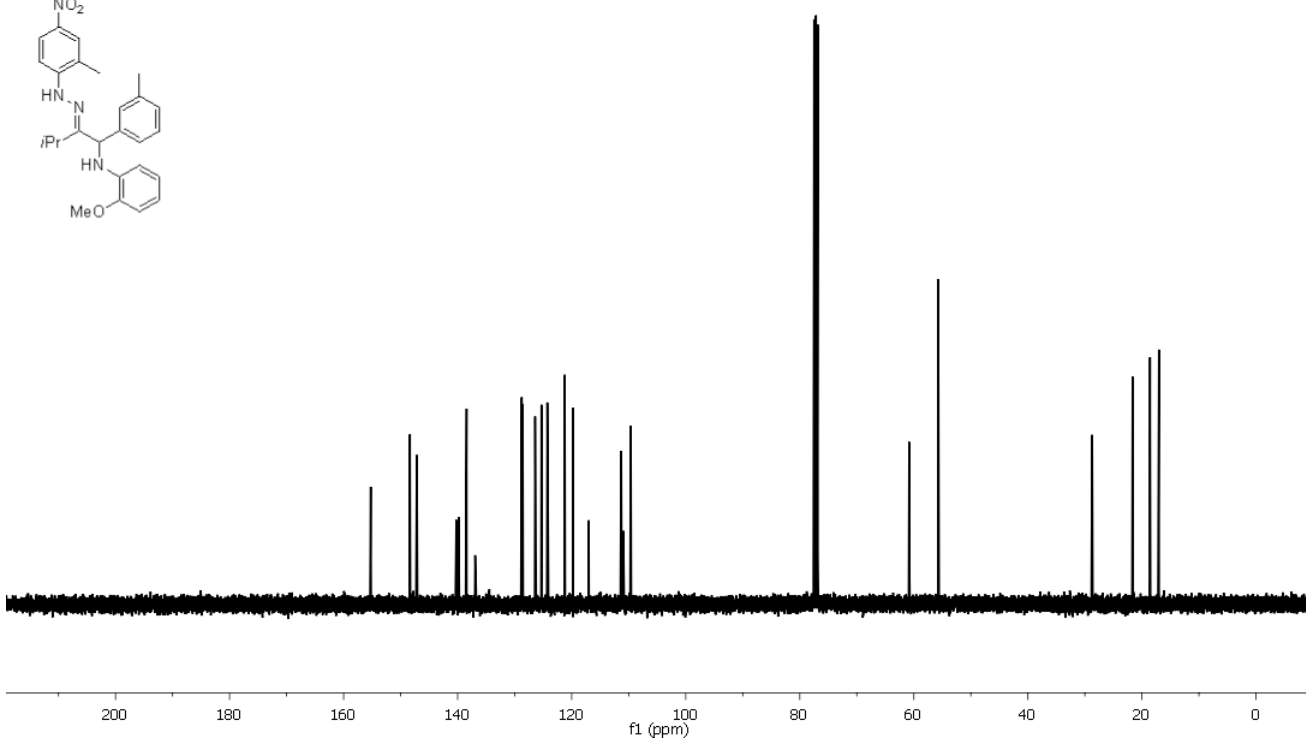

2c (1H NMR)  
CDCl3 400 MHz

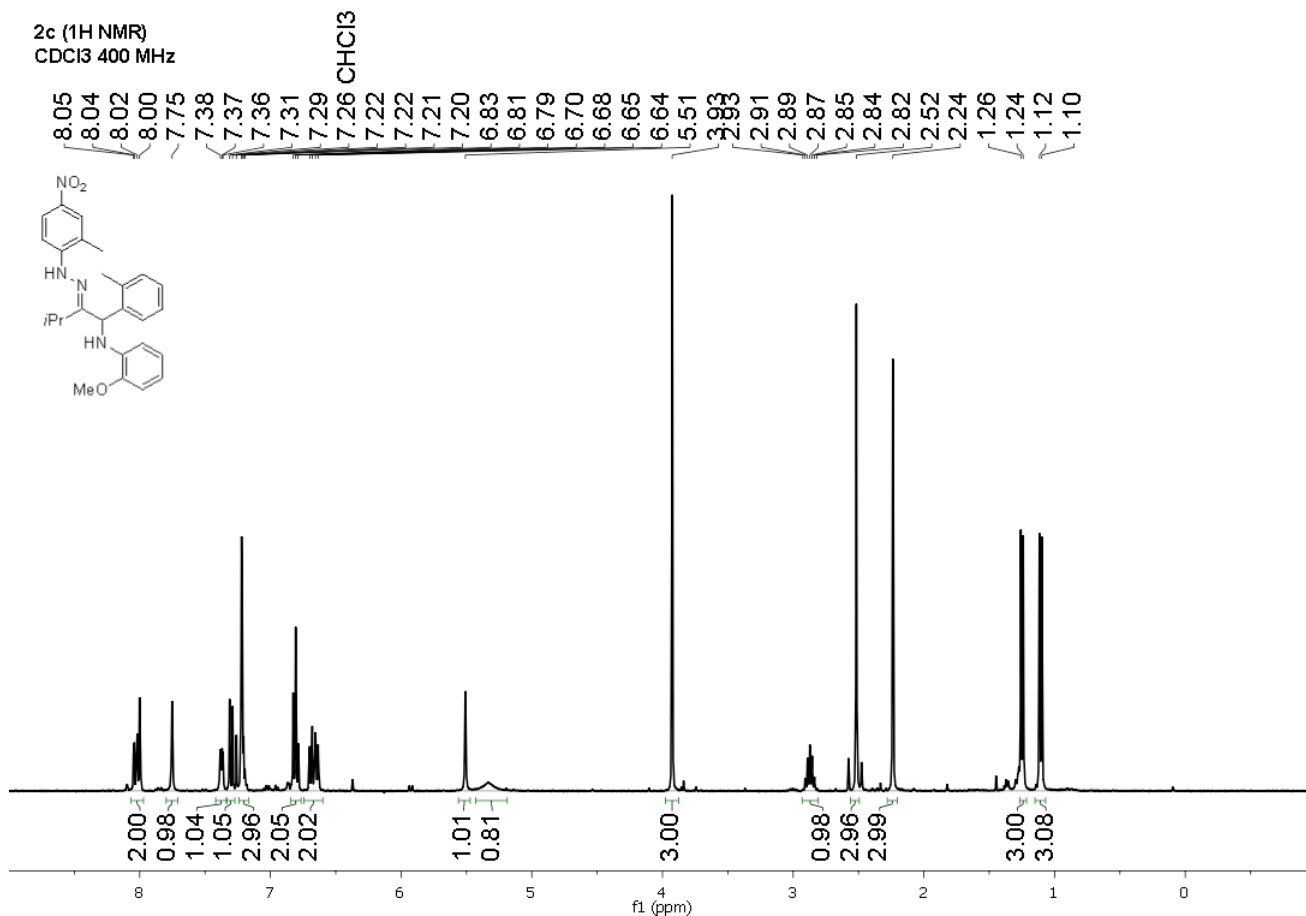

2c (13C NMR)  
CDCl3 101 MHz

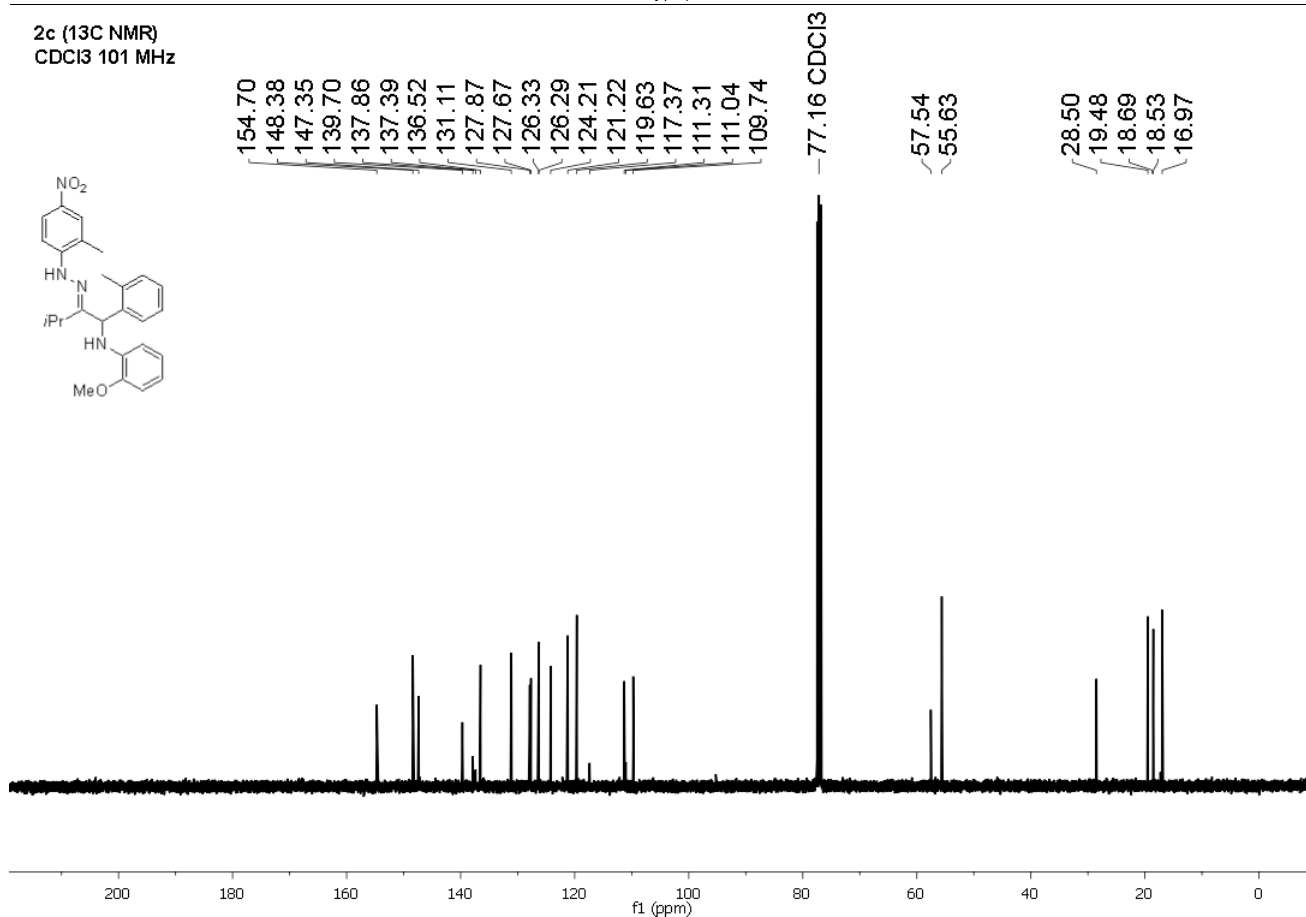

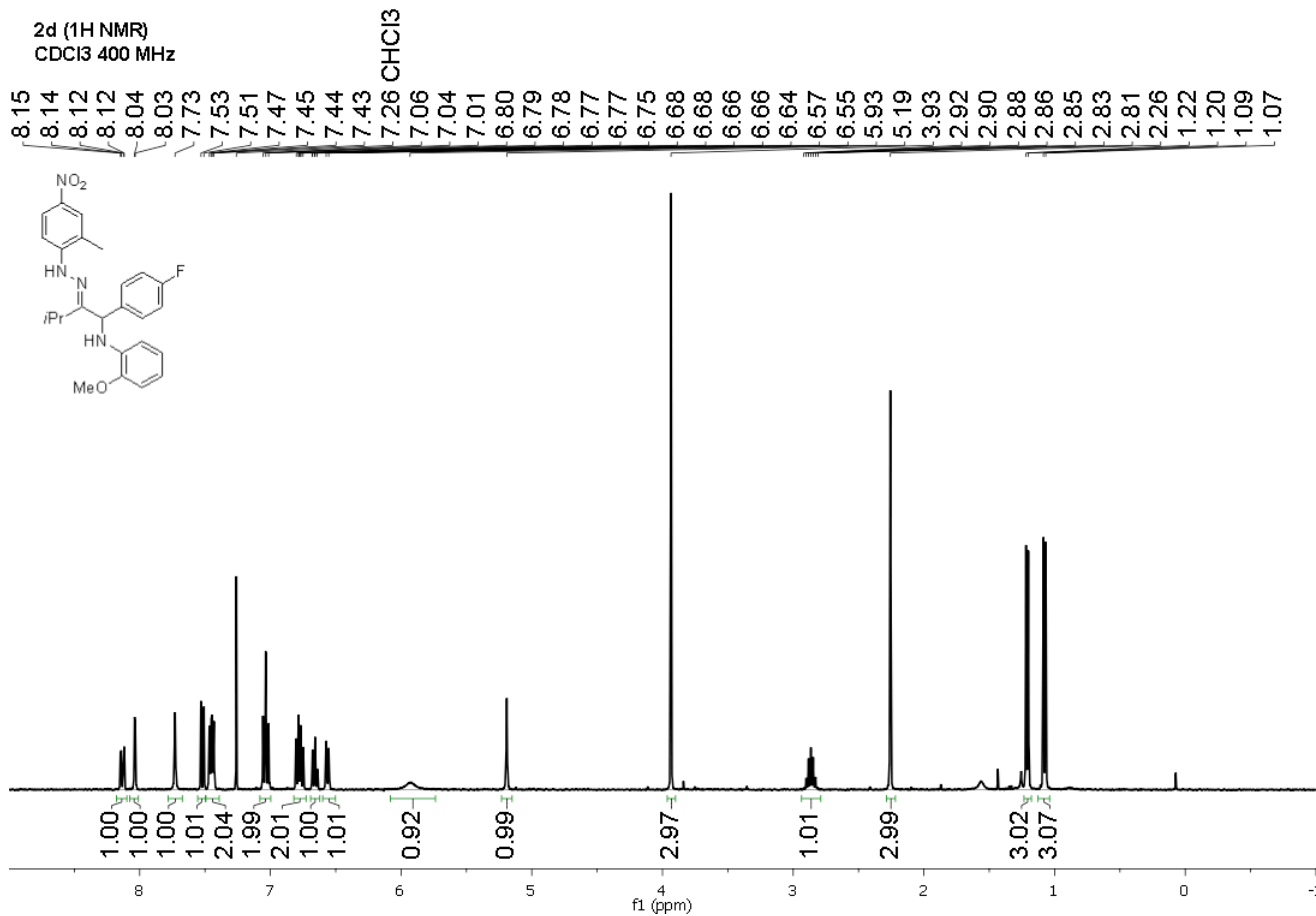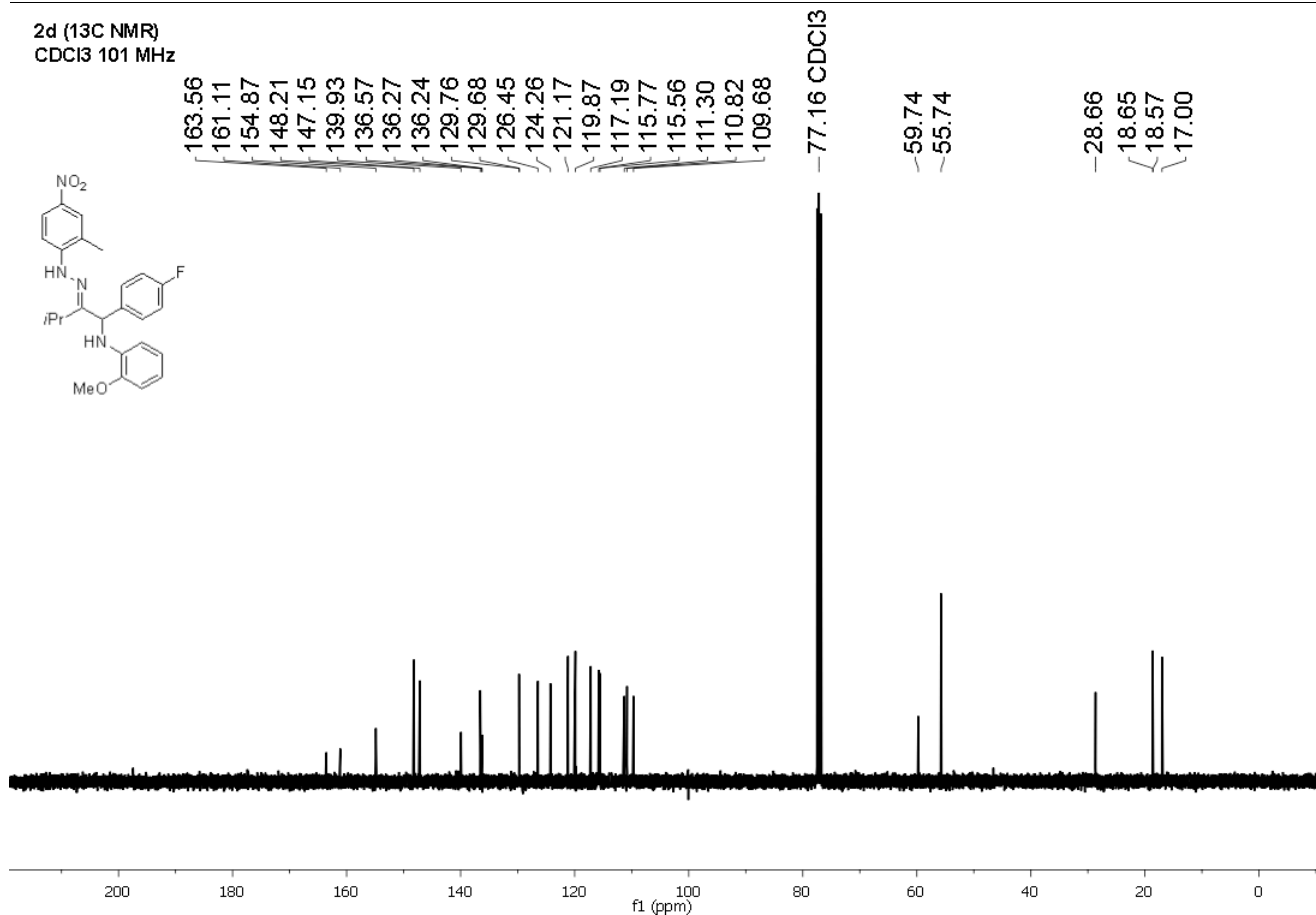

2d (19F NMR)  
 CDCl3 376 MHz

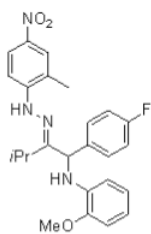

-113.67  
 -113.68  
 -113.69  
 -113.71  
 -113.72  
 -113.73  
 -113.74

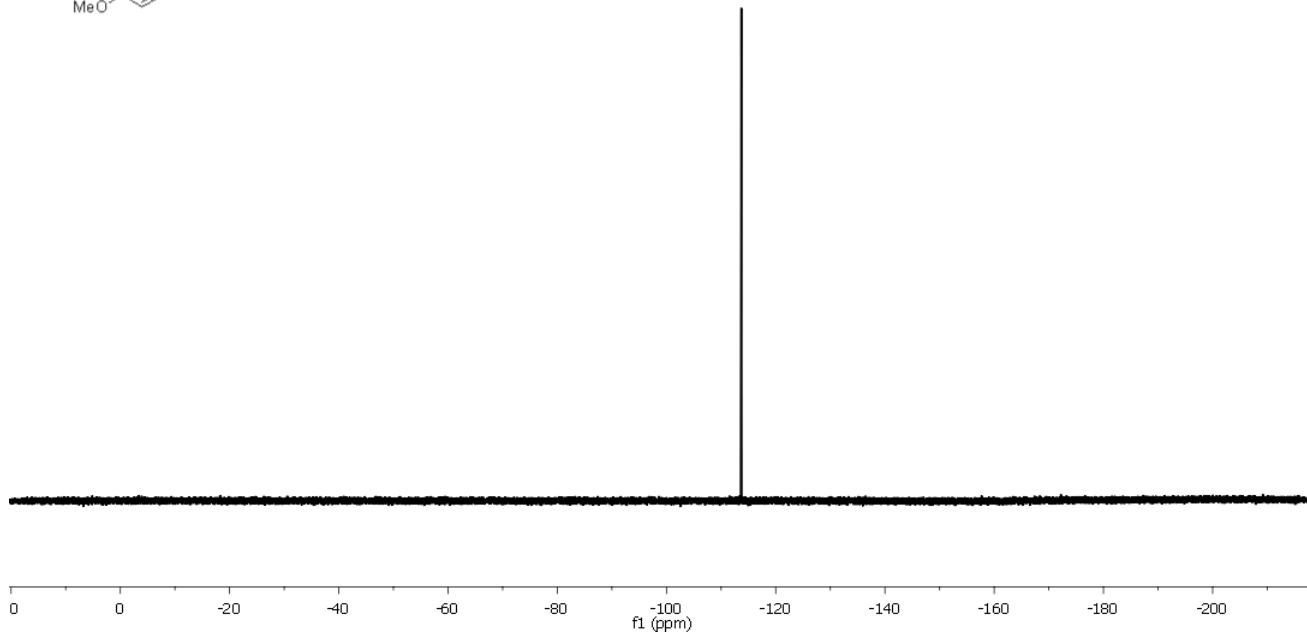

2e (1H NMR)  
 CDCl3 400 MHz

CHCl3

8.15  
 8.14  
 8.13  
 8.12  
 8.04  
 8.03  
 7.74  
 7.53  
 7.51  
 7.44  
 7.42  
 7.33  
 7.31  
 7.26  
 6.81  
 6.79  
 6.77  
 6.77  
 6.75  
 6.75  
 6.69  
 6.68  
 6.67  
 6.66  
 6.65  
 6.64  
 6.56  
 6.56  
 6.54  
 5.92  
 5.19  
 3.94  
 2.93  
 2.91  
 2.90  
 2.88  
 2.86  
 2.84  
 2.83  
 2.26  
 1.23  
 1.21  
 1.11  
 1.09

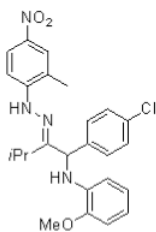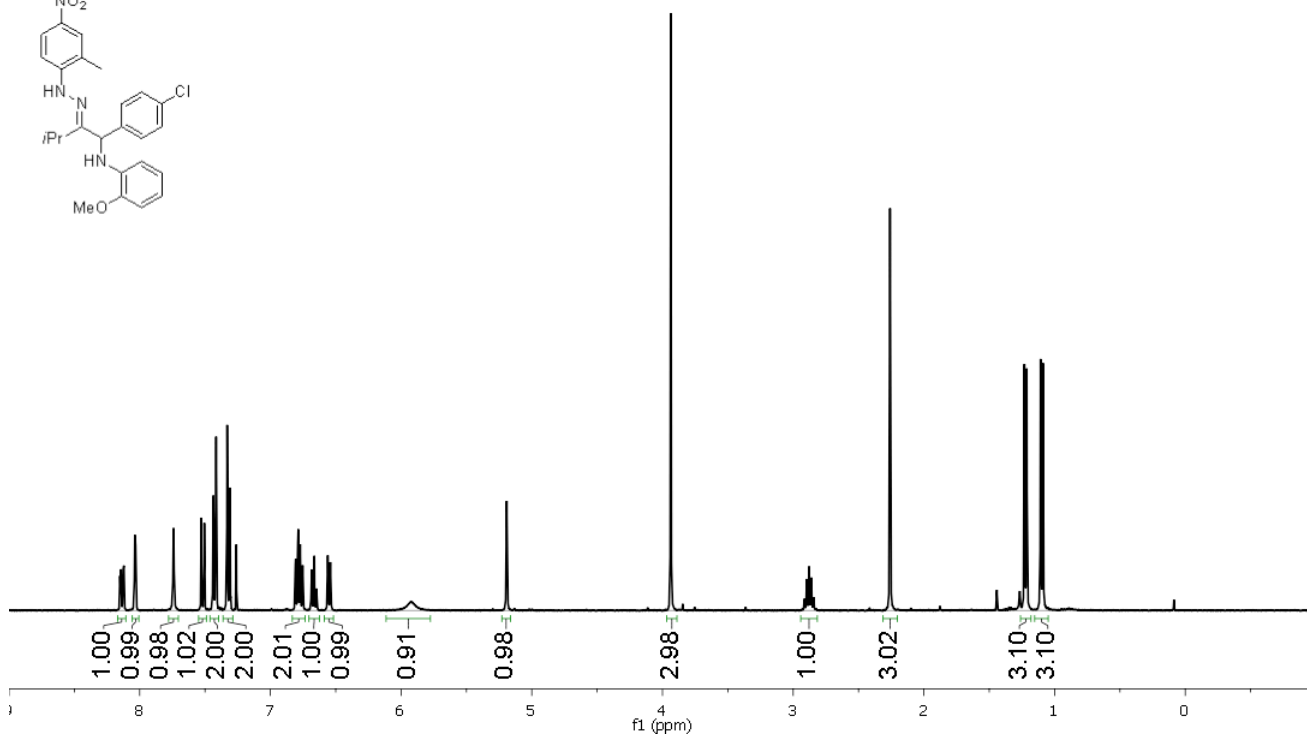



2e (<sup>13</sup>C NMR)  
 CDCl<sub>3</sub> 101 MHz

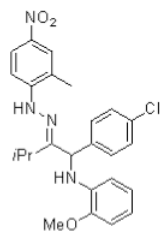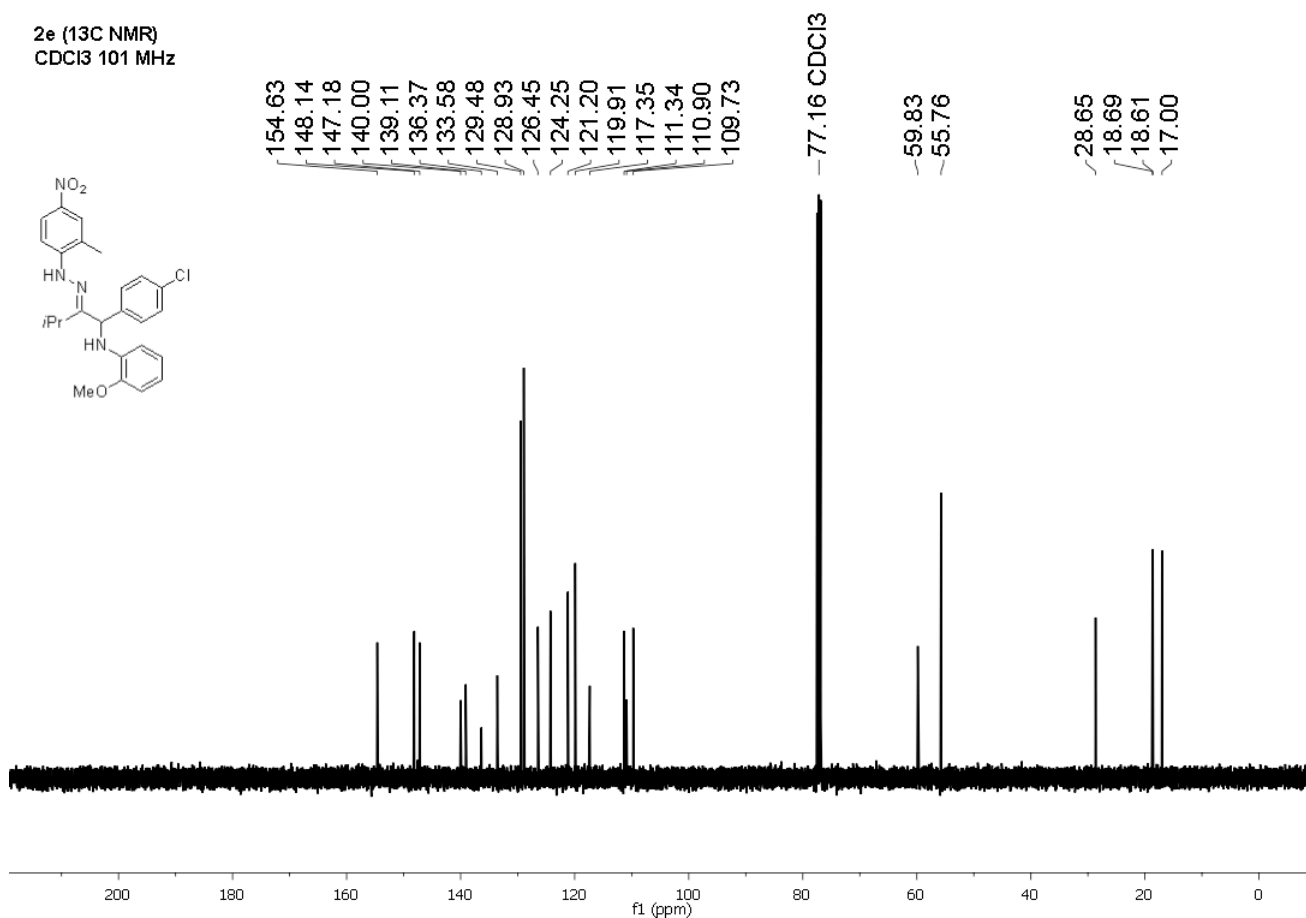

2f (<sup>1</sup>H NMR)  
 CDCl<sub>3</sub> 400 MHz

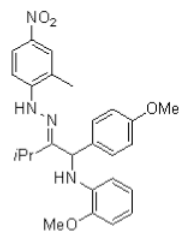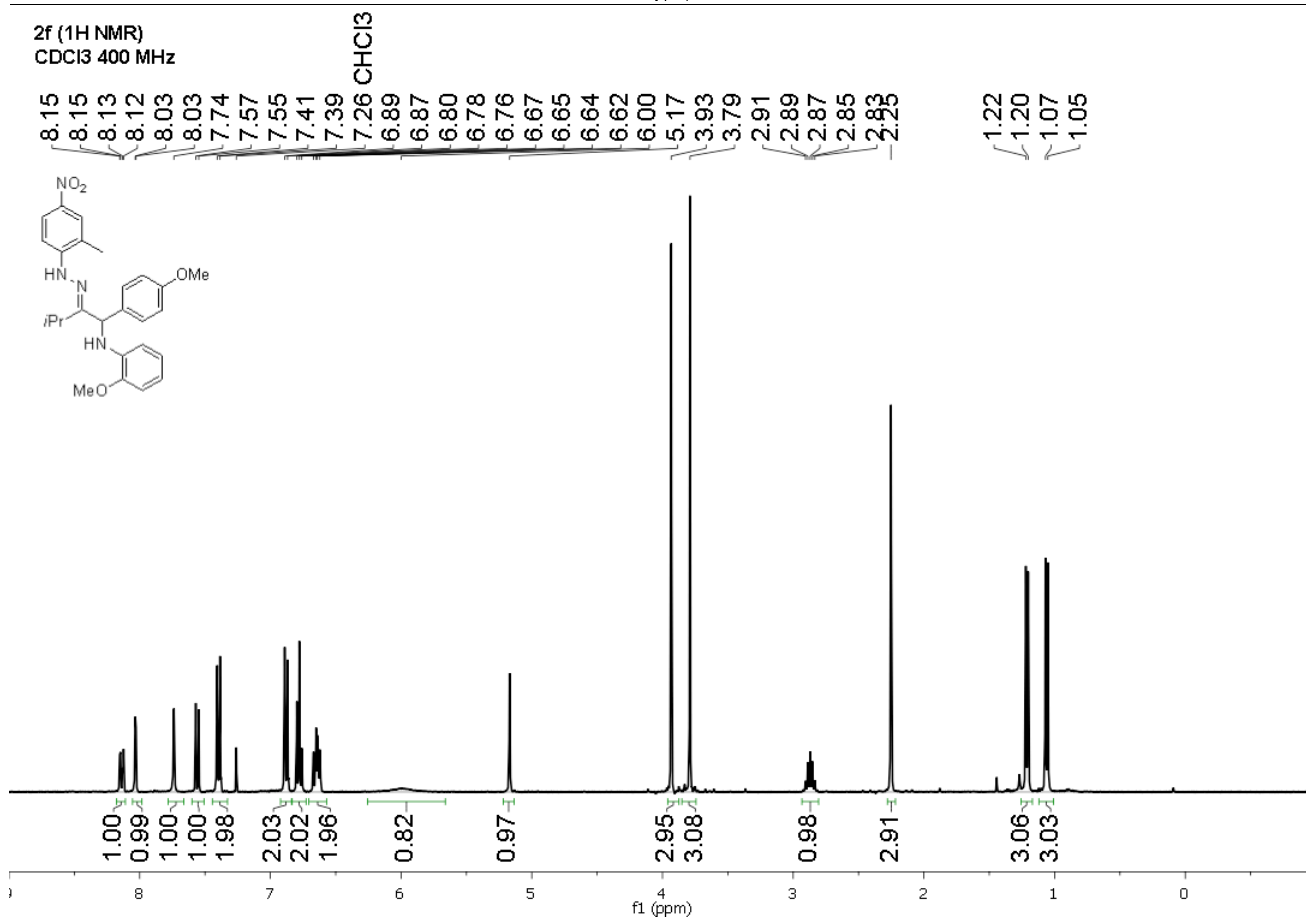

2f (13C NMR)  
 CDCl3 101 MHz

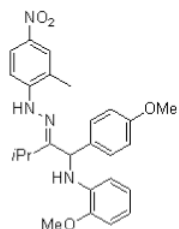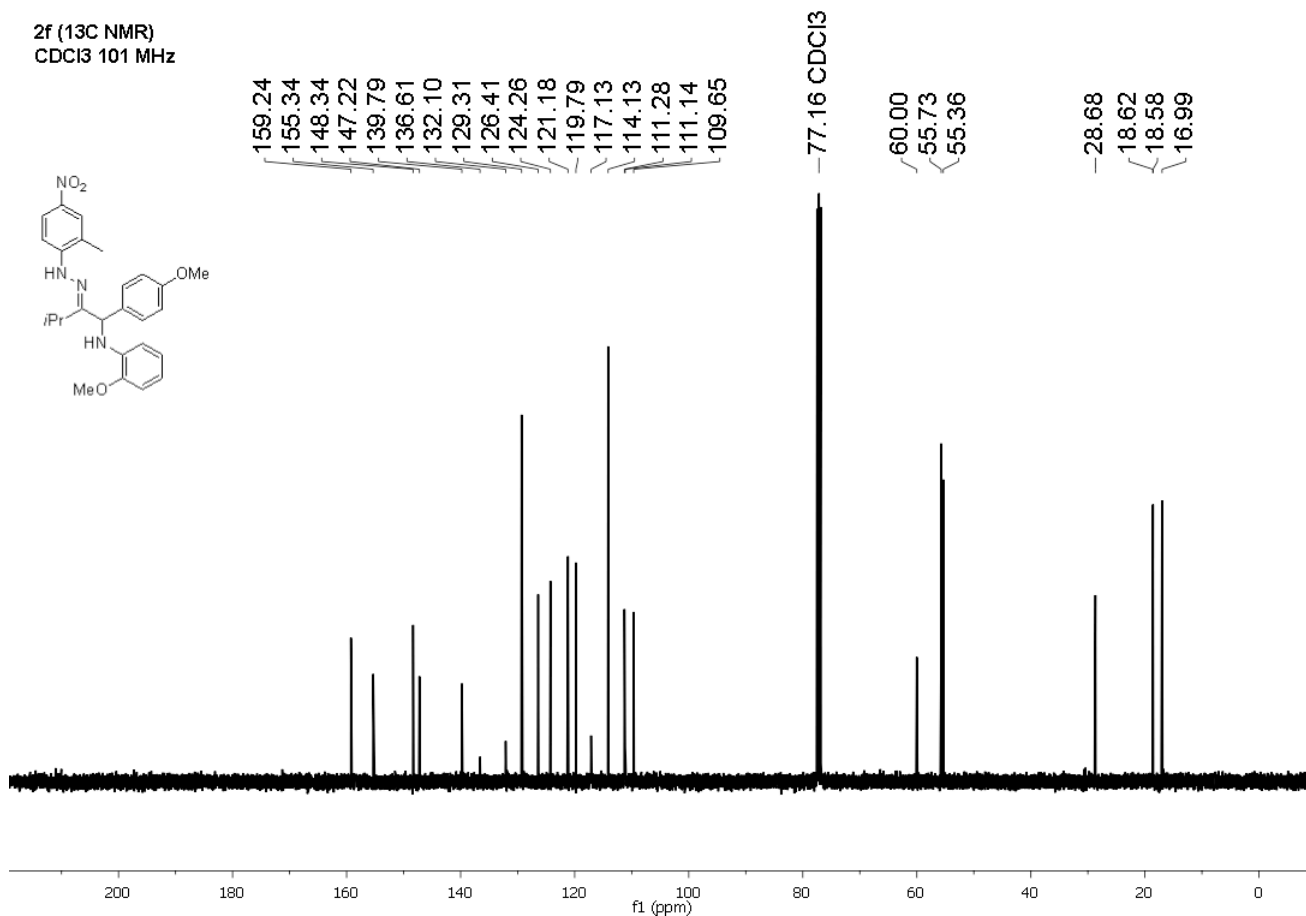

2g (1H NMR)  
 CDCl3 400 MHz

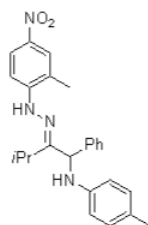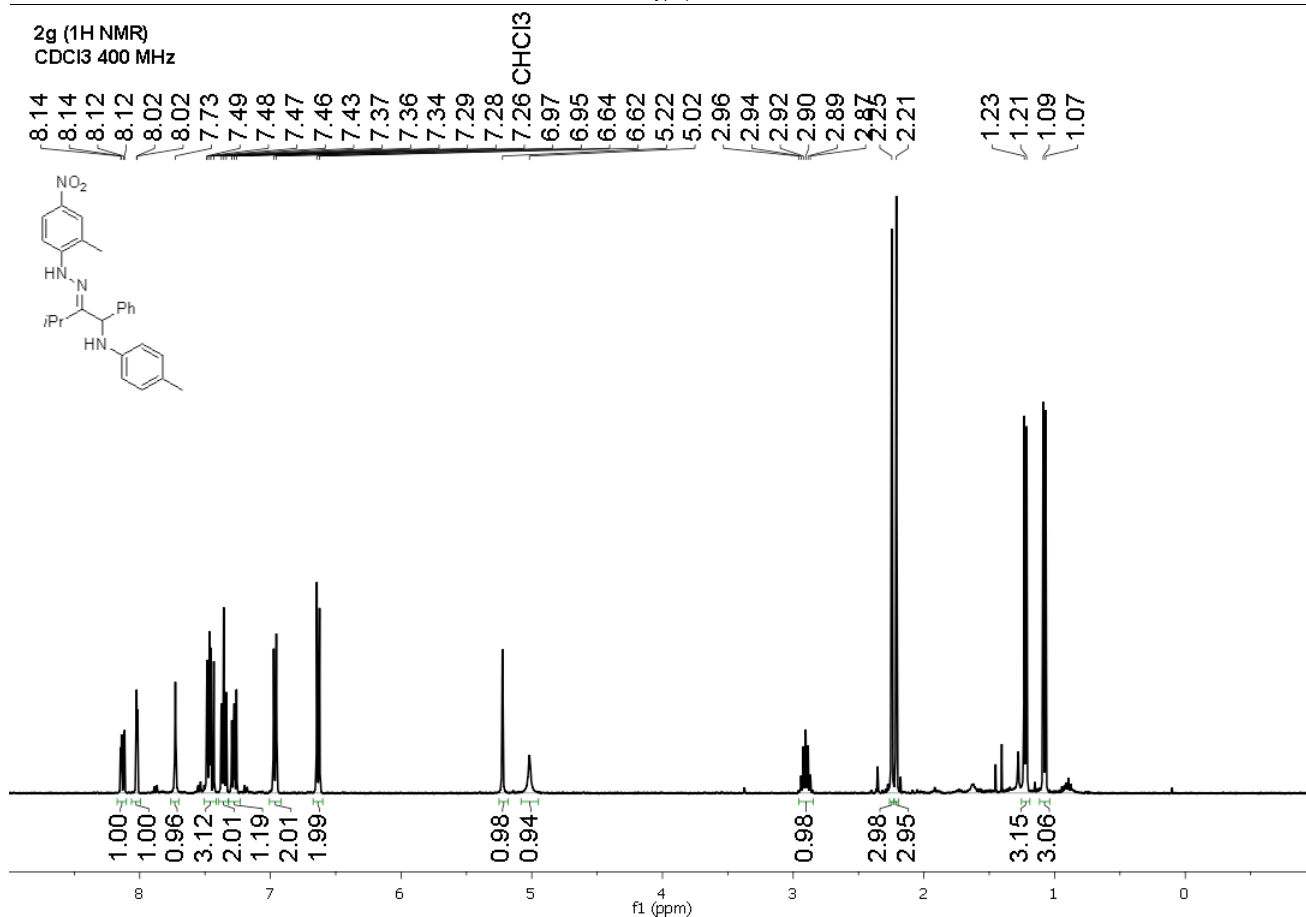

2g (<sup>13</sup>C NMR)  
 CDCl<sub>3</sub> 101 MHz

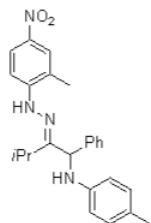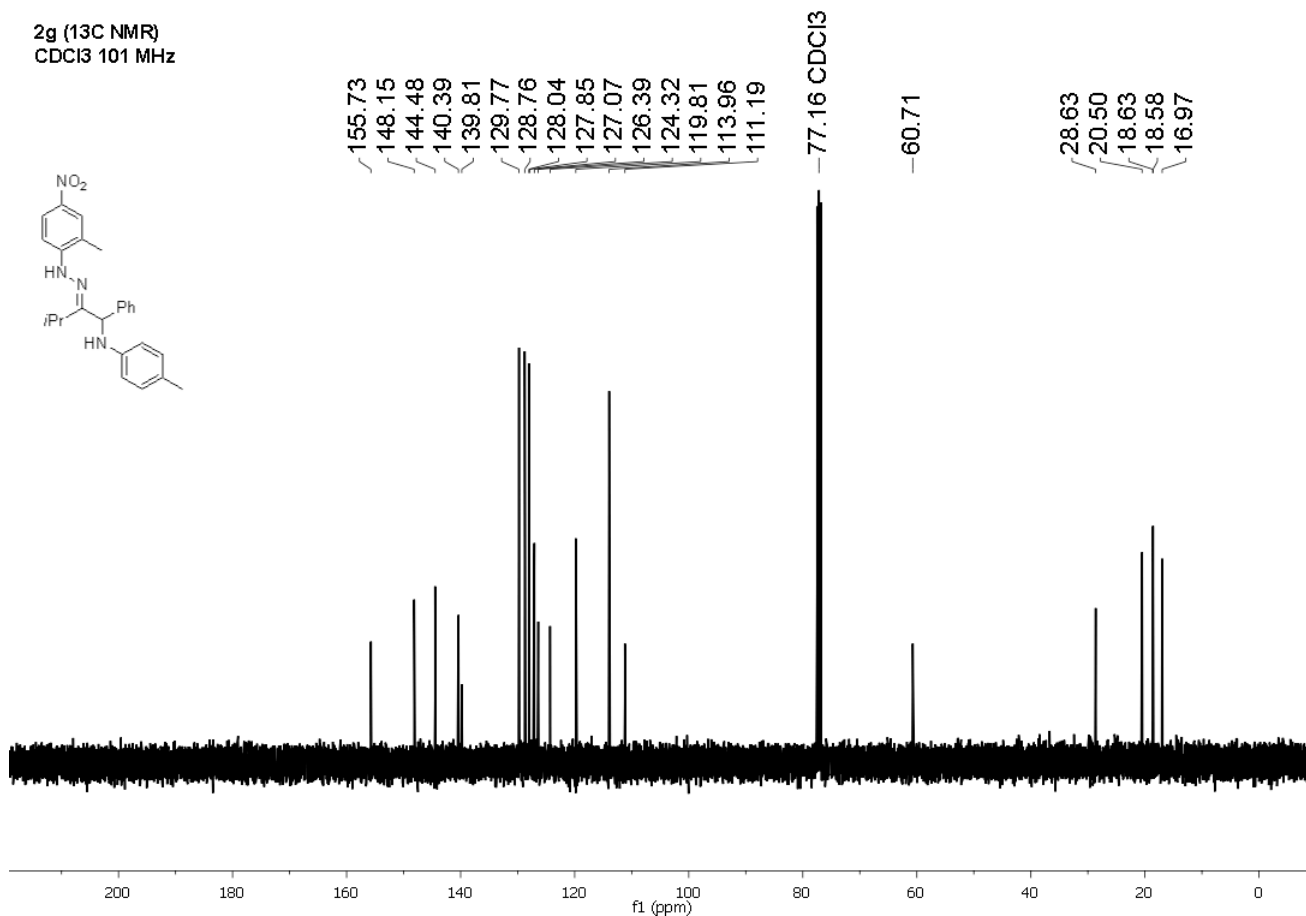

2h (<sup>1</sup>H NMR)  
 CDCl<sub>3</sub> 400 MHz

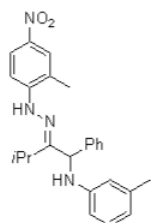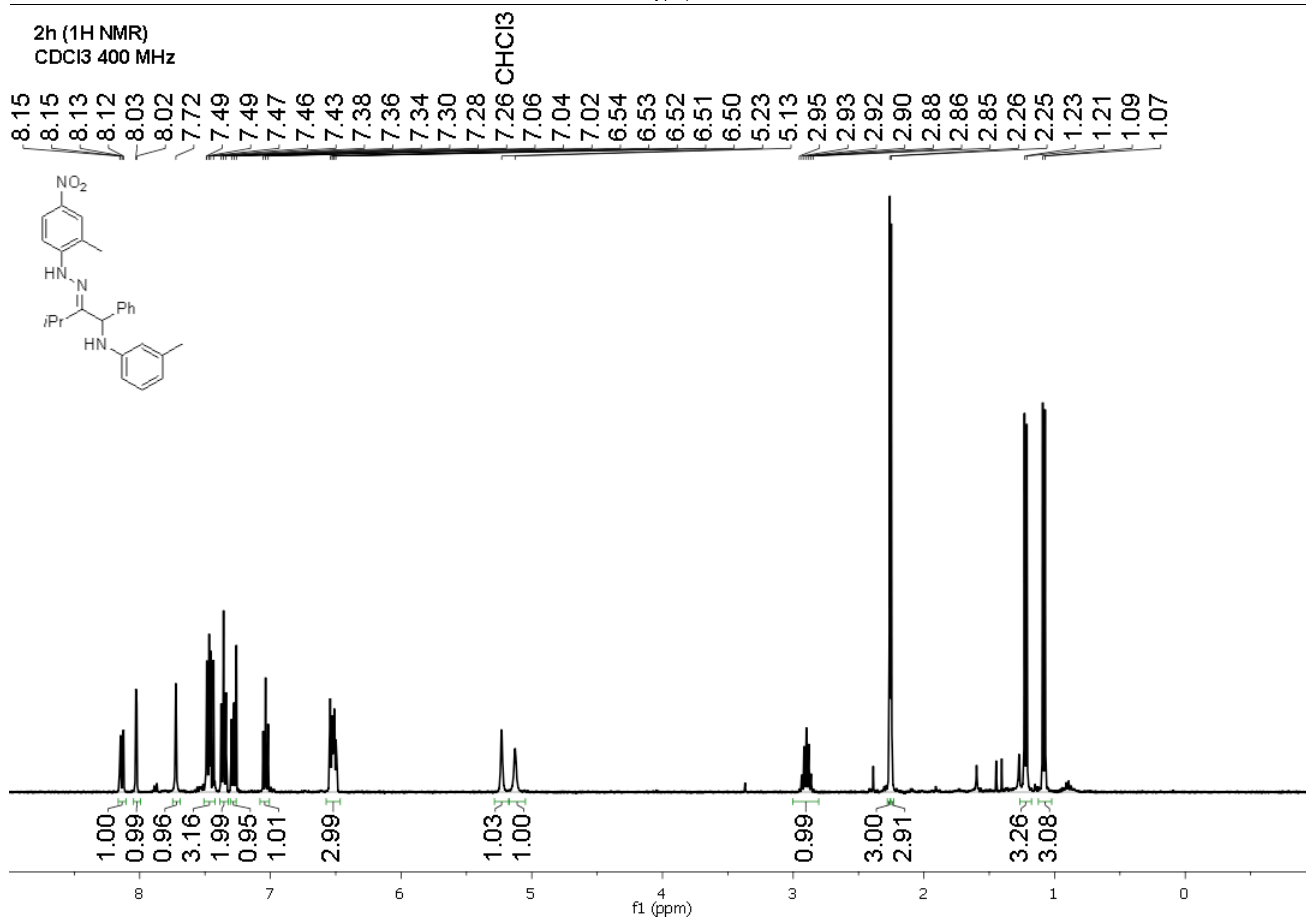

2h (13C NMR)  
CDCl3 101 MHz

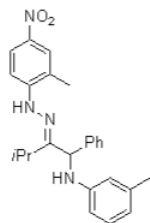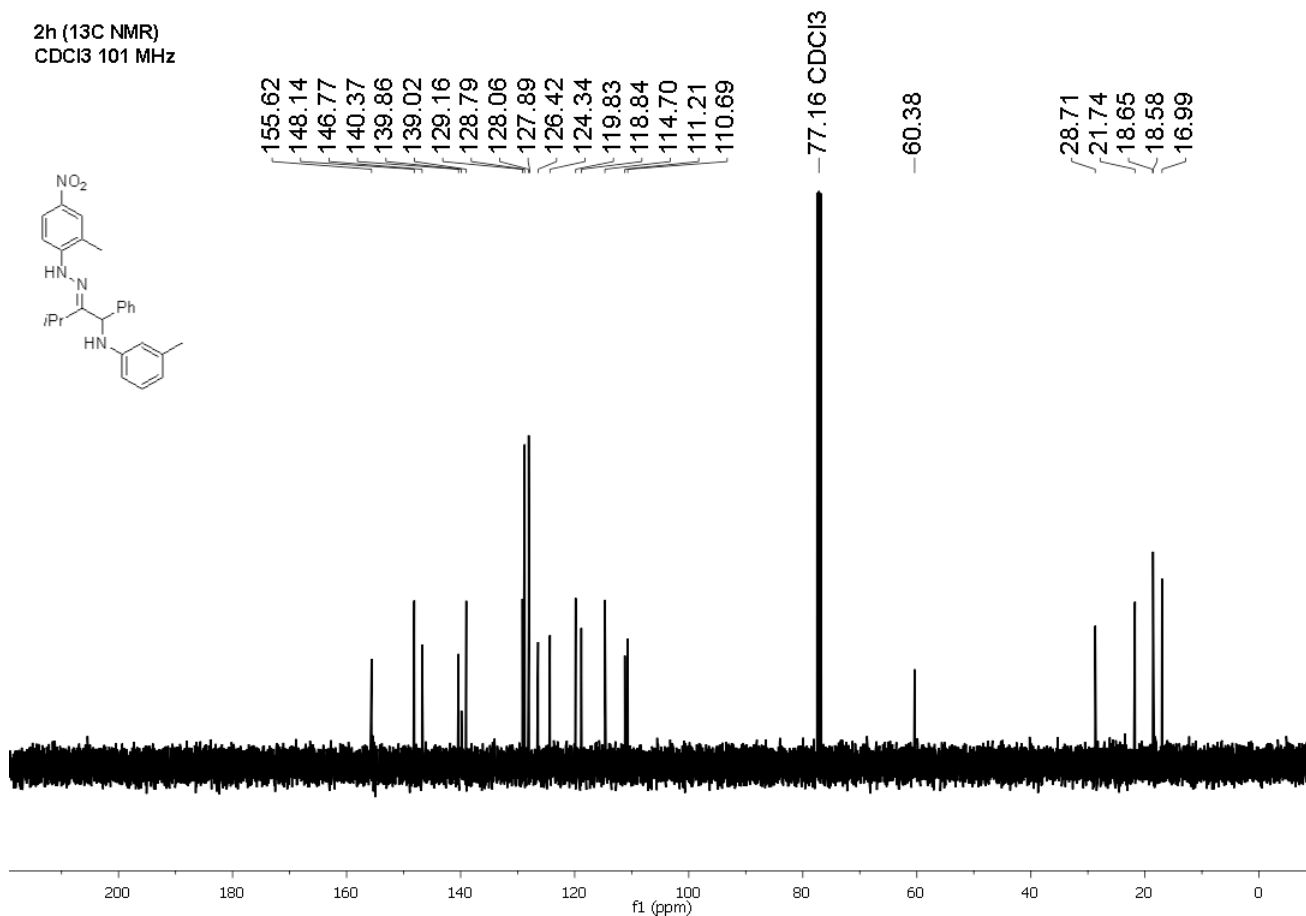

2i (1H NMR)  
CDCl3 400 MHz

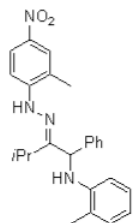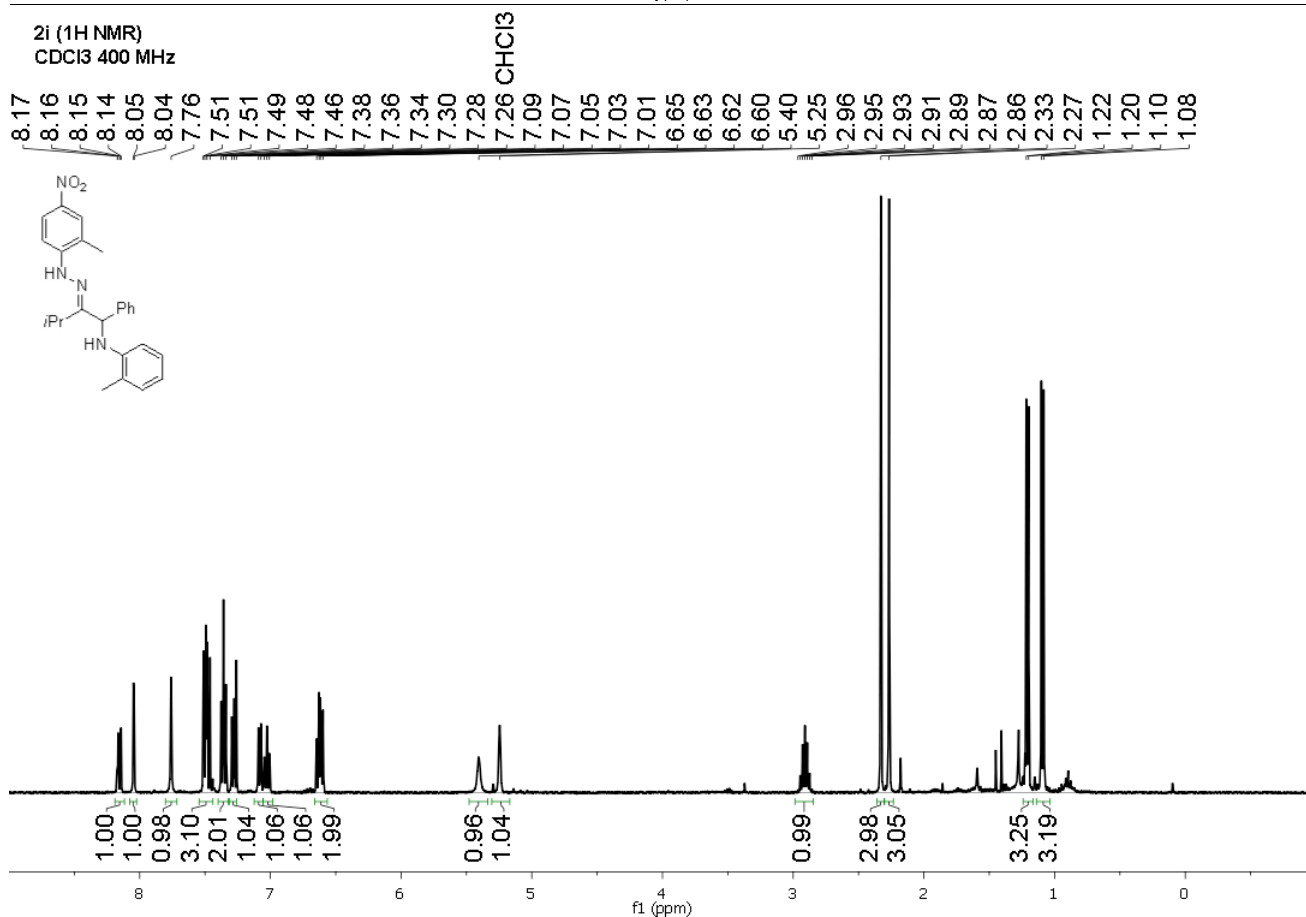

2i (13C NMR)  
 CDCl3 101 MHz



155.49  
 148.14  
 144.57  
 140.28  
 139.90  
 130.28  
 128.79  
 128.19  
 127.94  
 127.06  
 126.48  
 124.35  
 122.14  
 119.92  
 117.20  
 110.91  
 110.59

-77.16 CDCl3

-60.31

-28.98  
 18.59  
 18.47  
 17.81  
 17.01

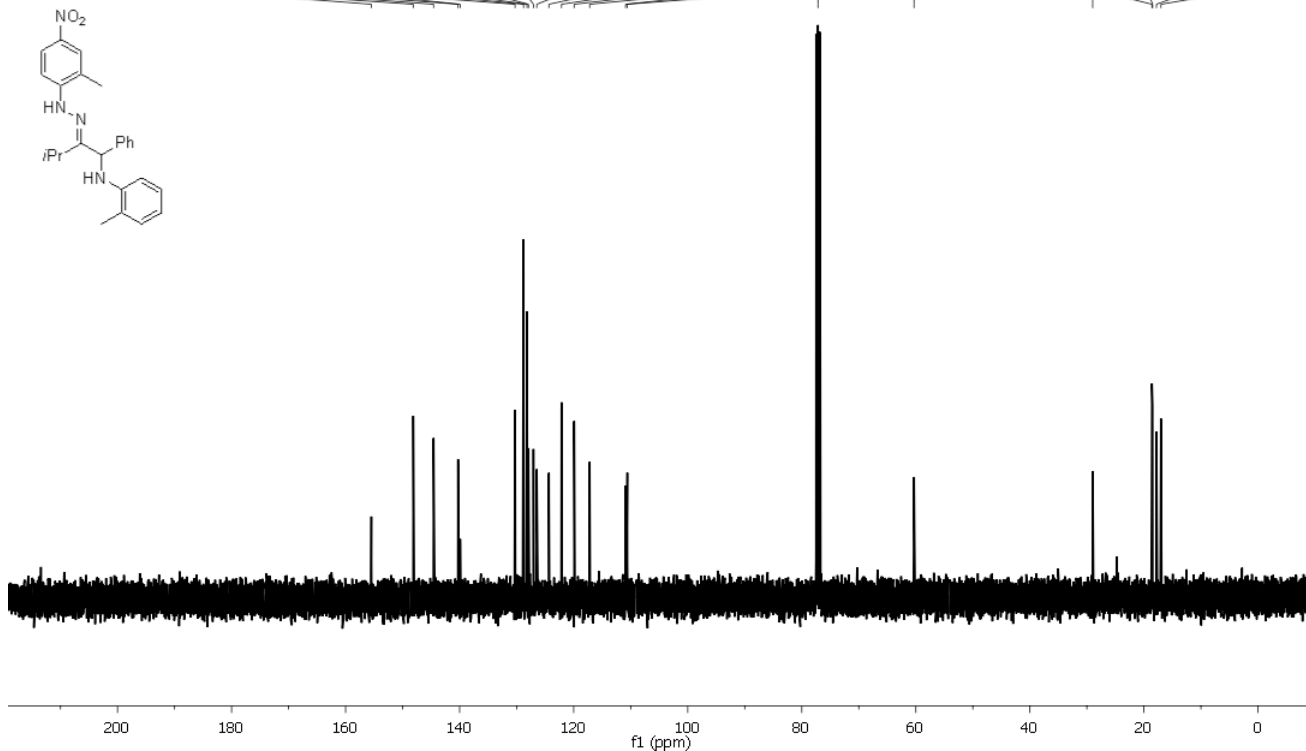

2j (1H NMR)  
 CDCl3 400 MHz

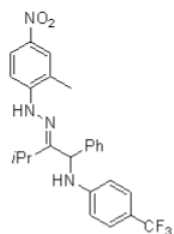

8.17  
 8.16  
 8.14  
 8.14  
 8.04  
 8.04  
 7.73  
 7.48  
 7.47  
 7.45  
 7.44  
 7.42  
 7.38  
 7.37  
 7.37  
 7.35  
 7.32  
 7.31  
 7.31  
 7.30  
 7.26 CHCl3  
 6.69  
 6.67  
 5.66  
 5.64  
 5.21  
 5.20  
 2.94  
 2.93  
 2.91  
 2.89  
 2.87  
 2.85  
 2.84  
 2.26  
 1.21  
 1.20  
 1.09  
 1.07

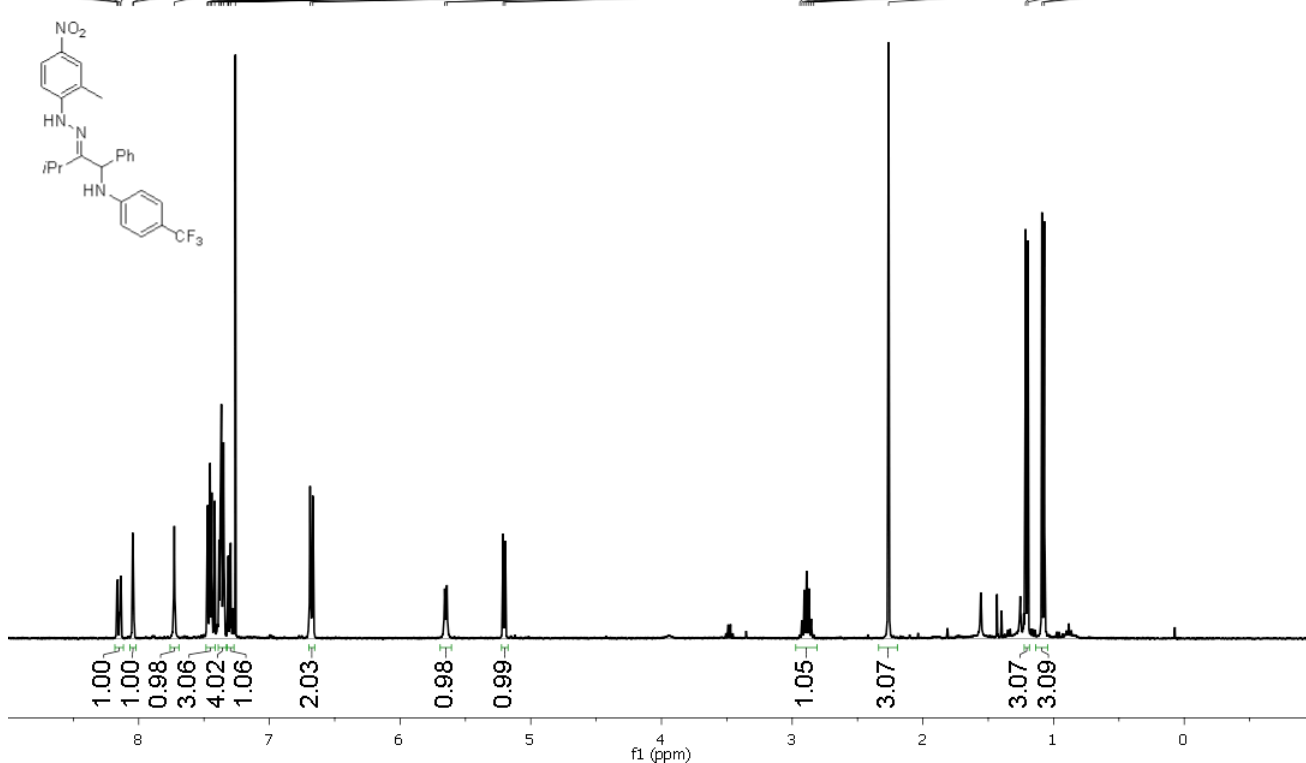

2j (13C NMR)  
CDCl3 101 MHz

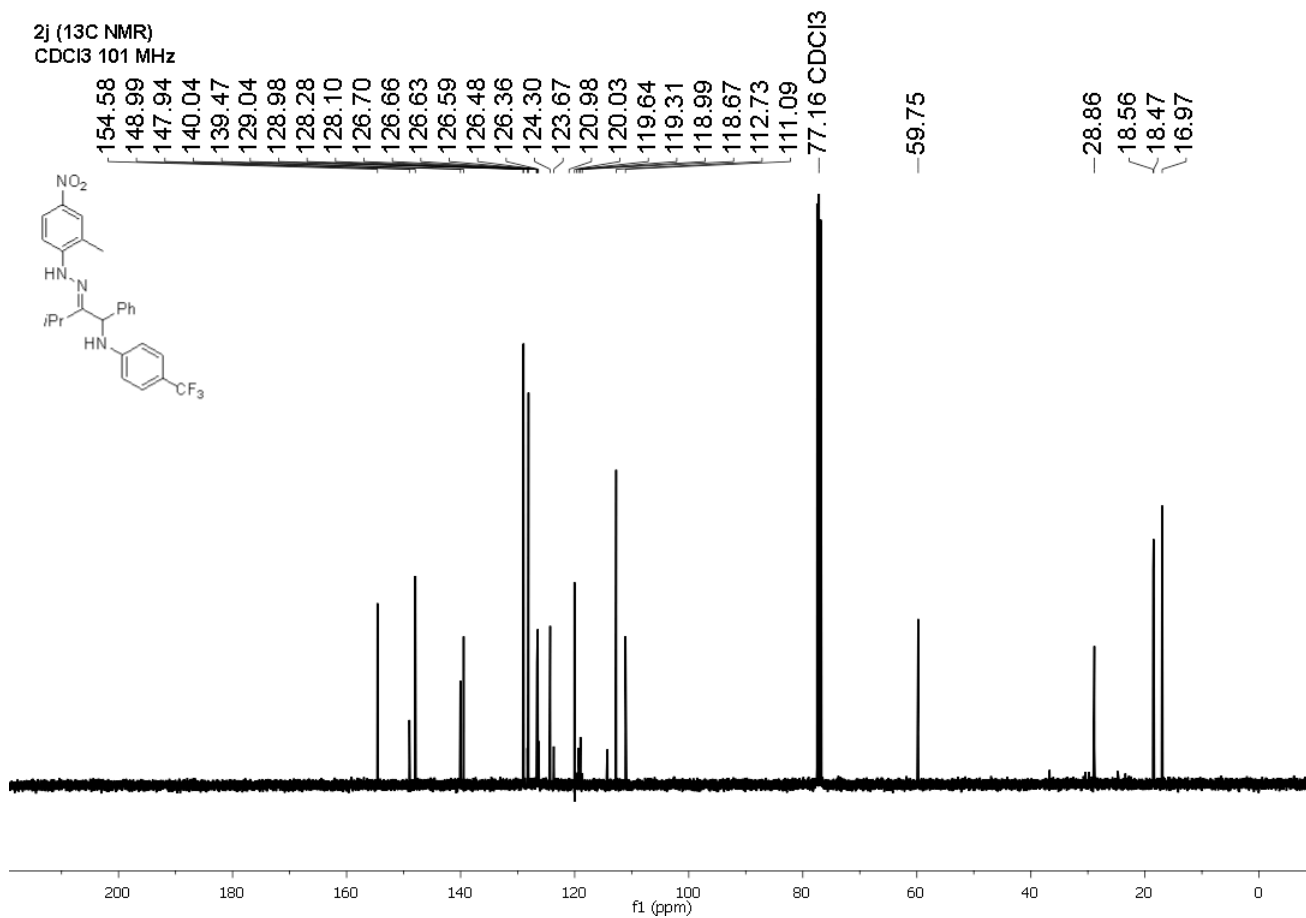

2j (19F NMR)  
CDCl3 376 MHz

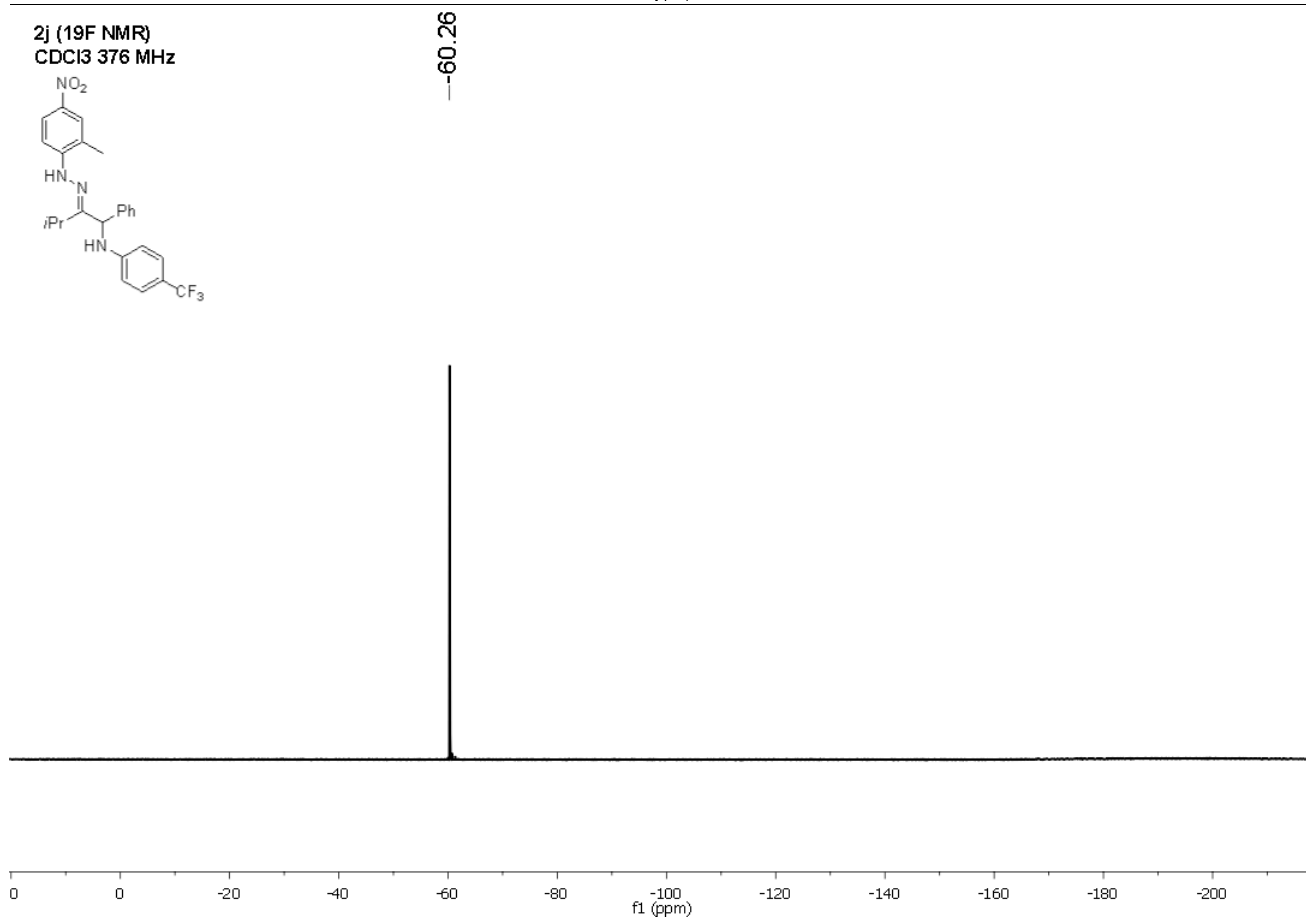

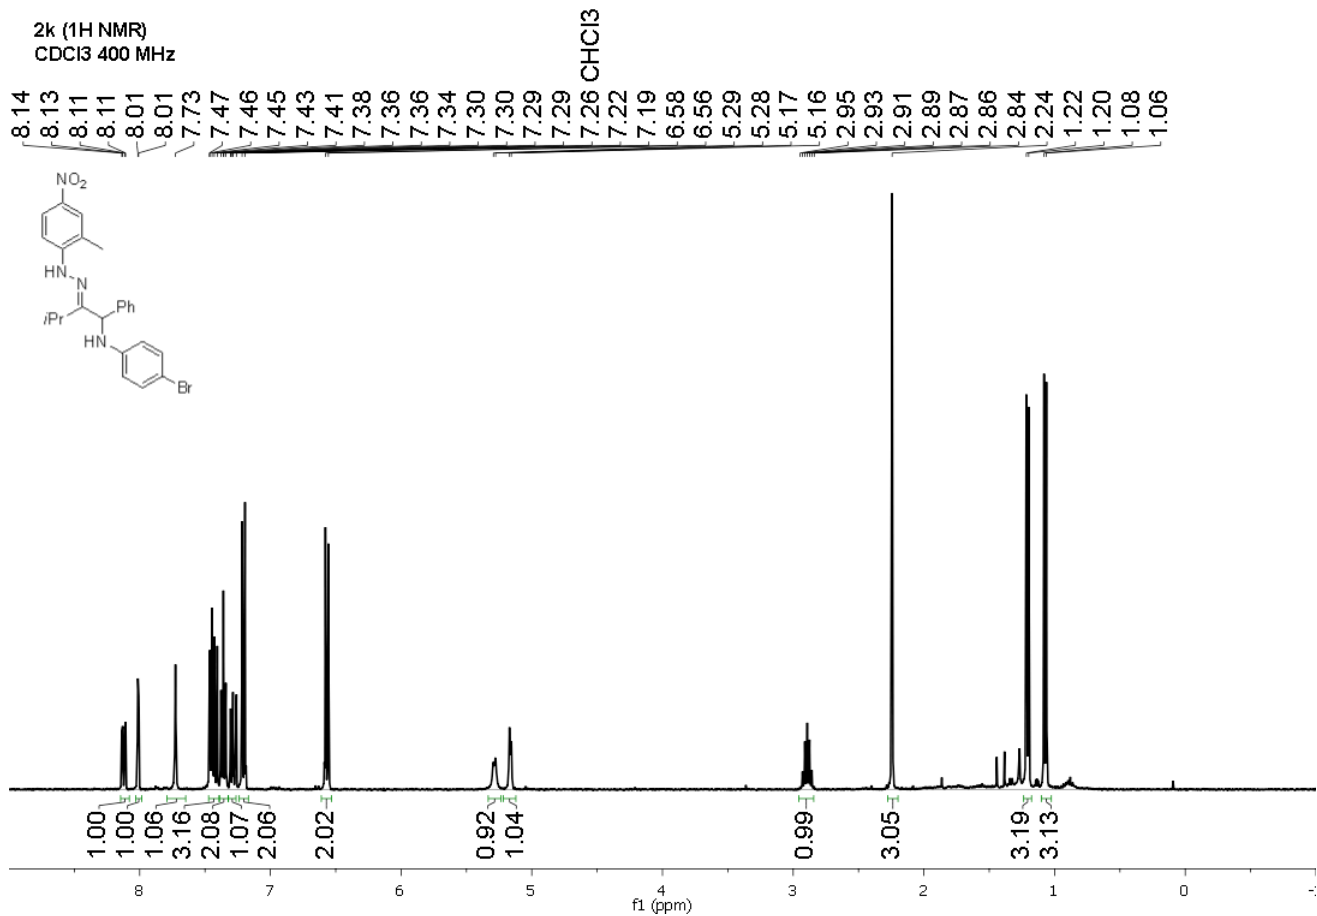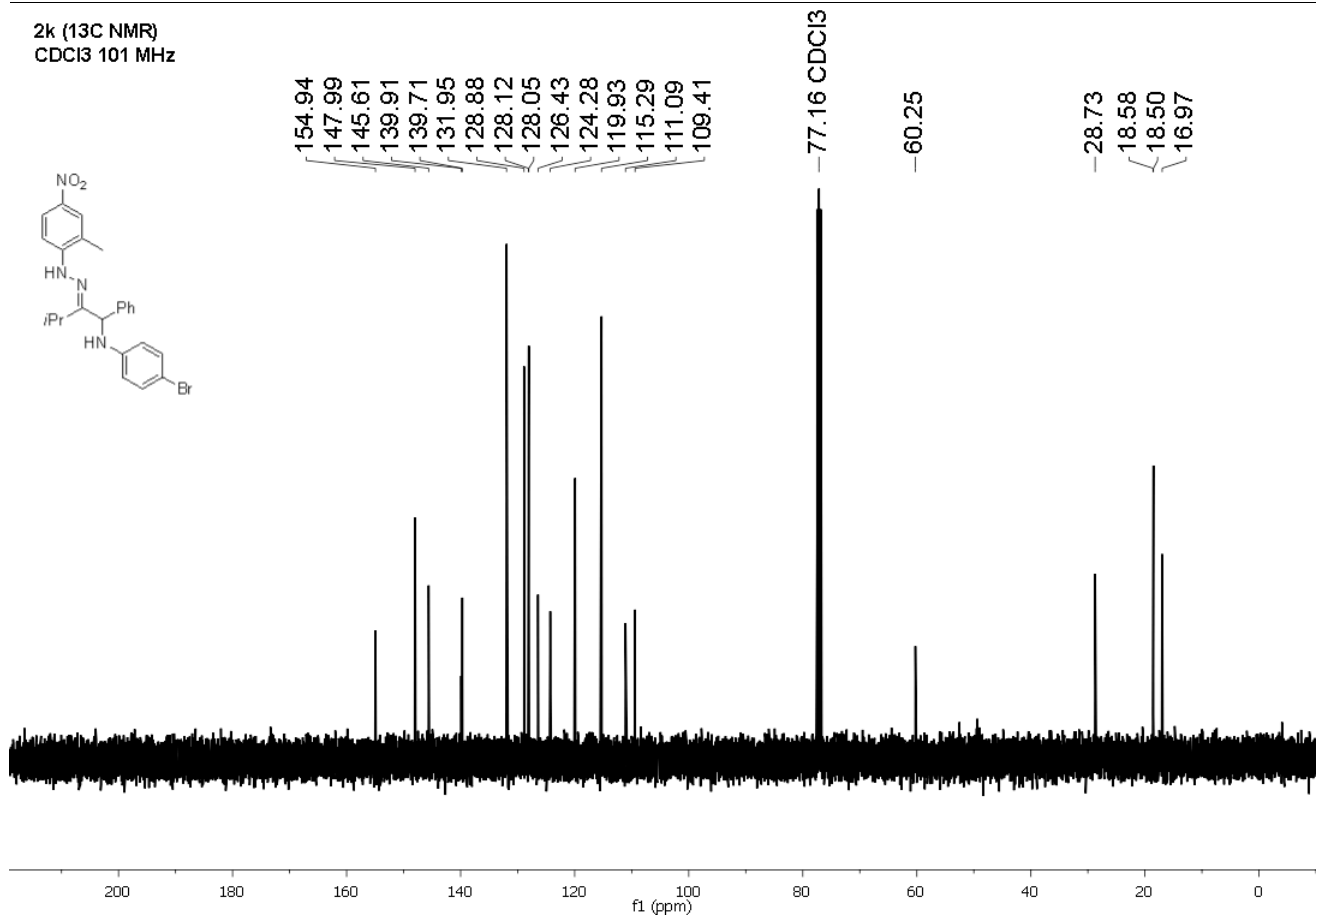

2I (1H NMR)  
CDCl3 400 MHz

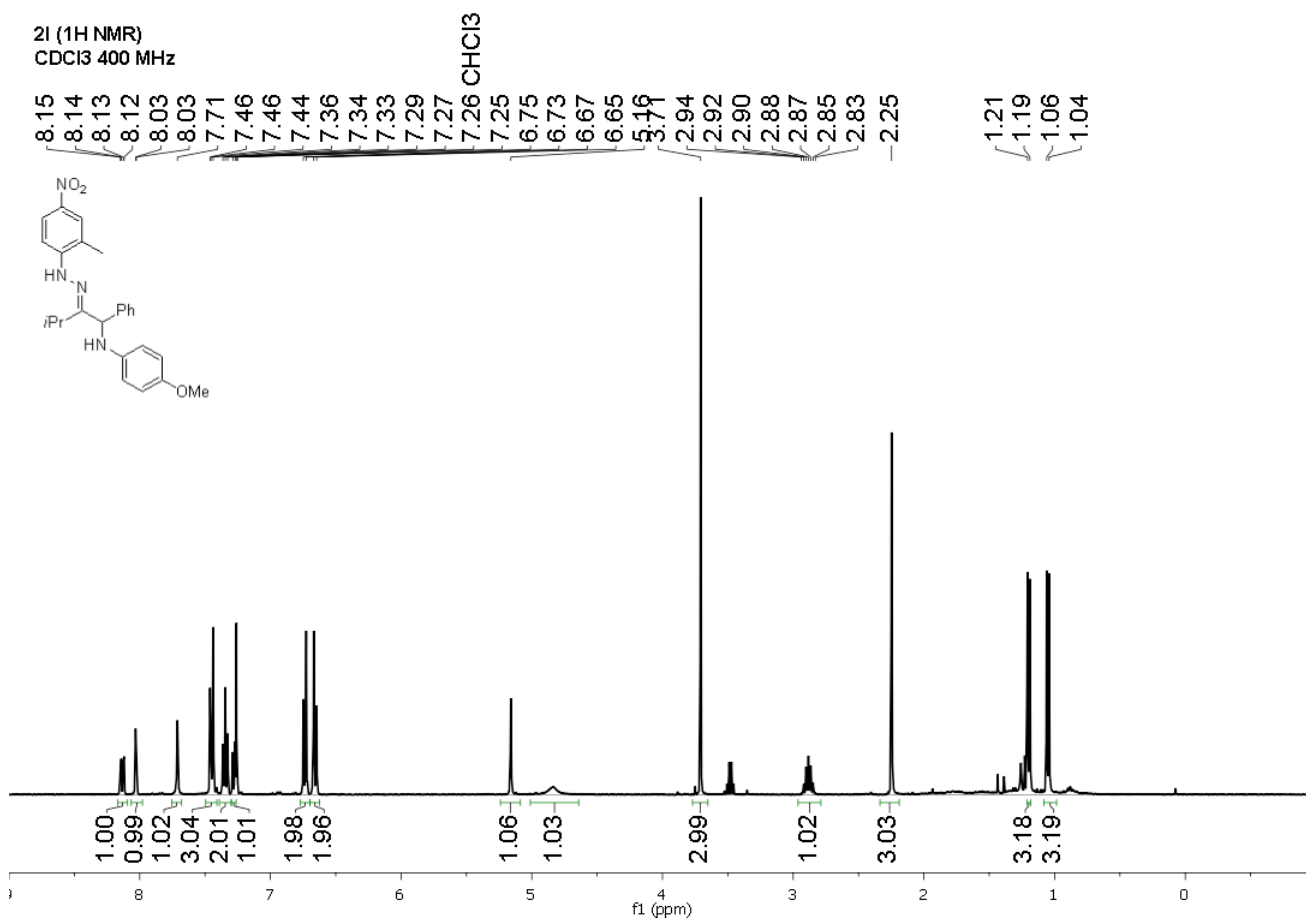

2I (13C NMR)  
CDCl3 101 MHz

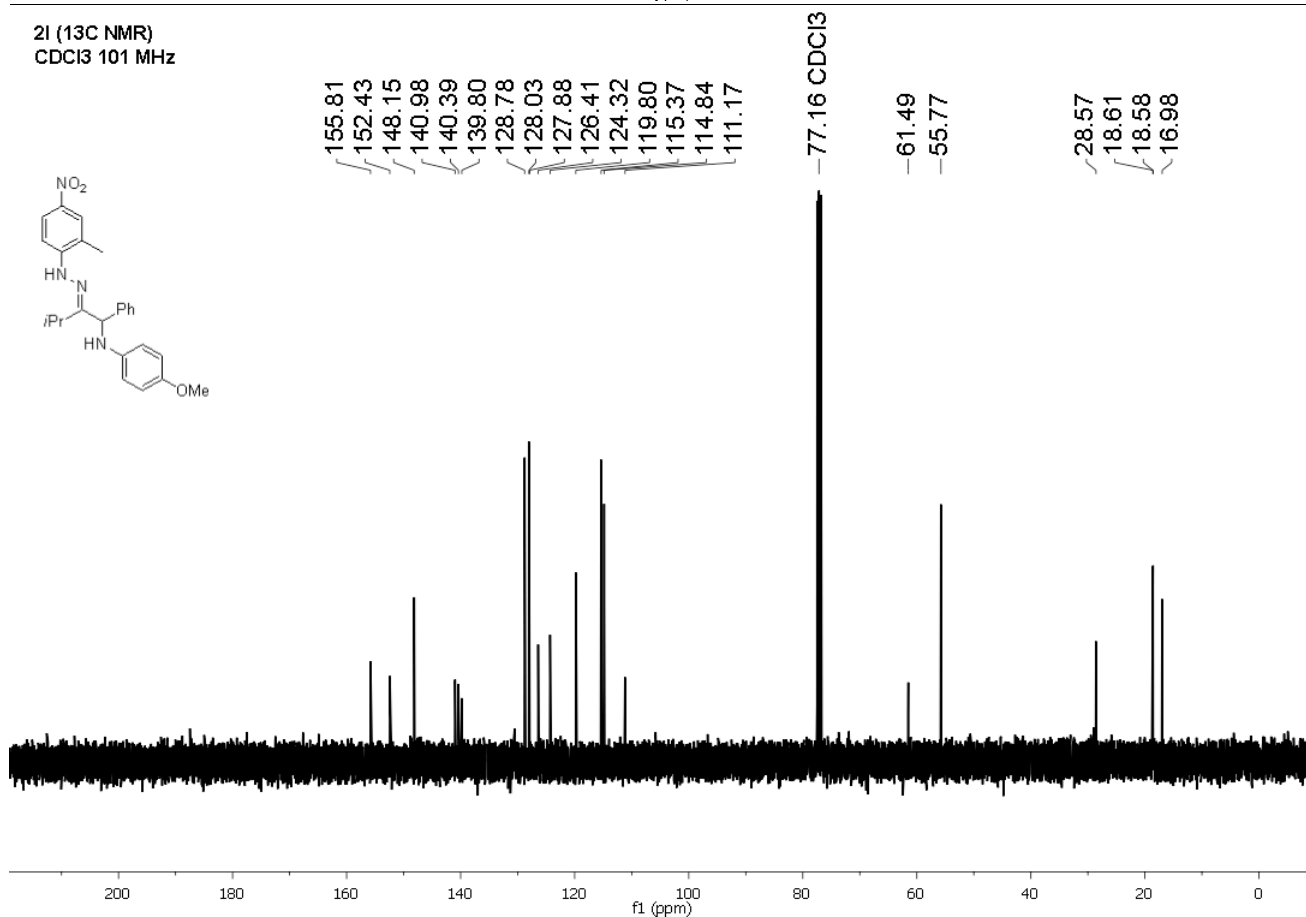



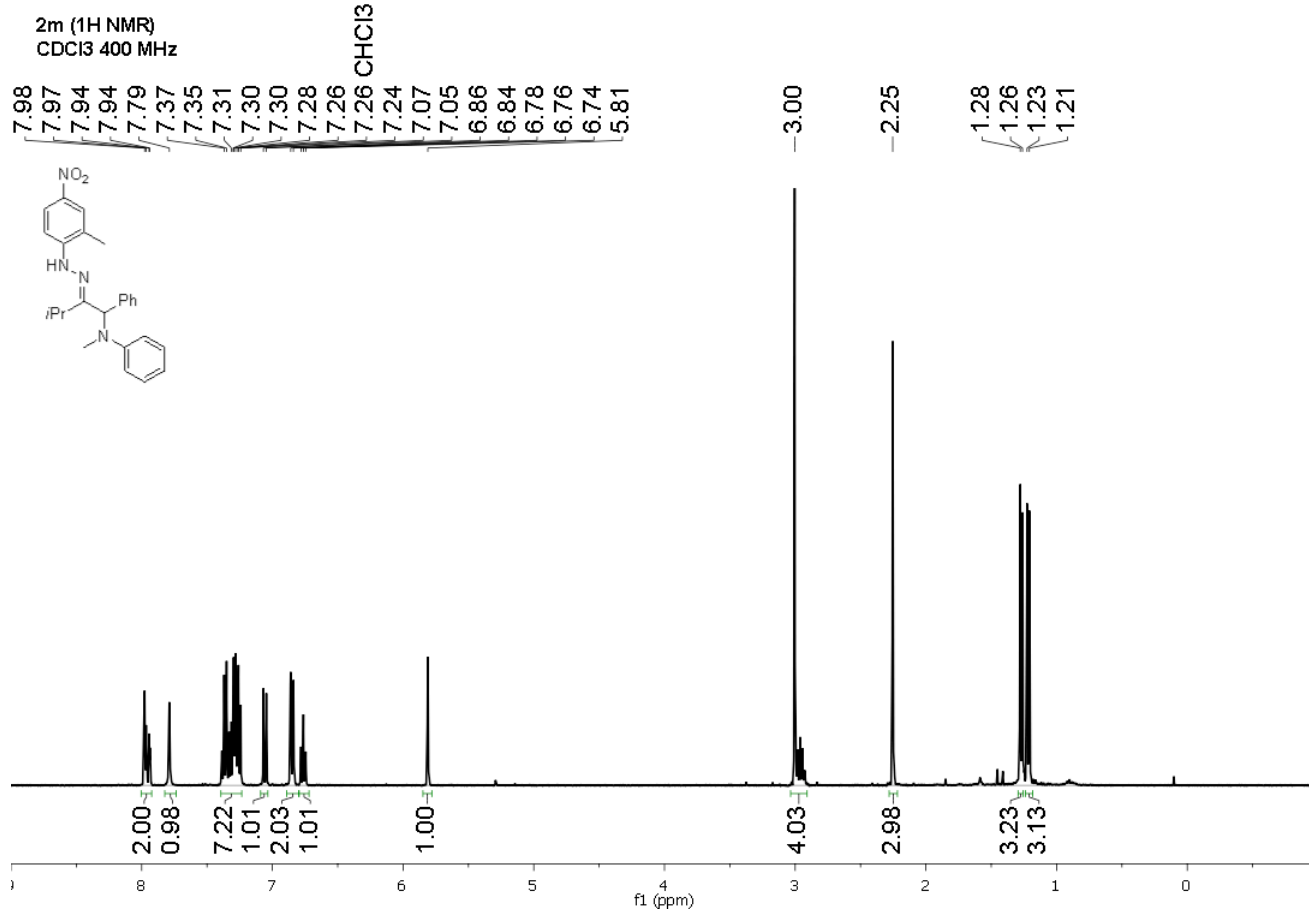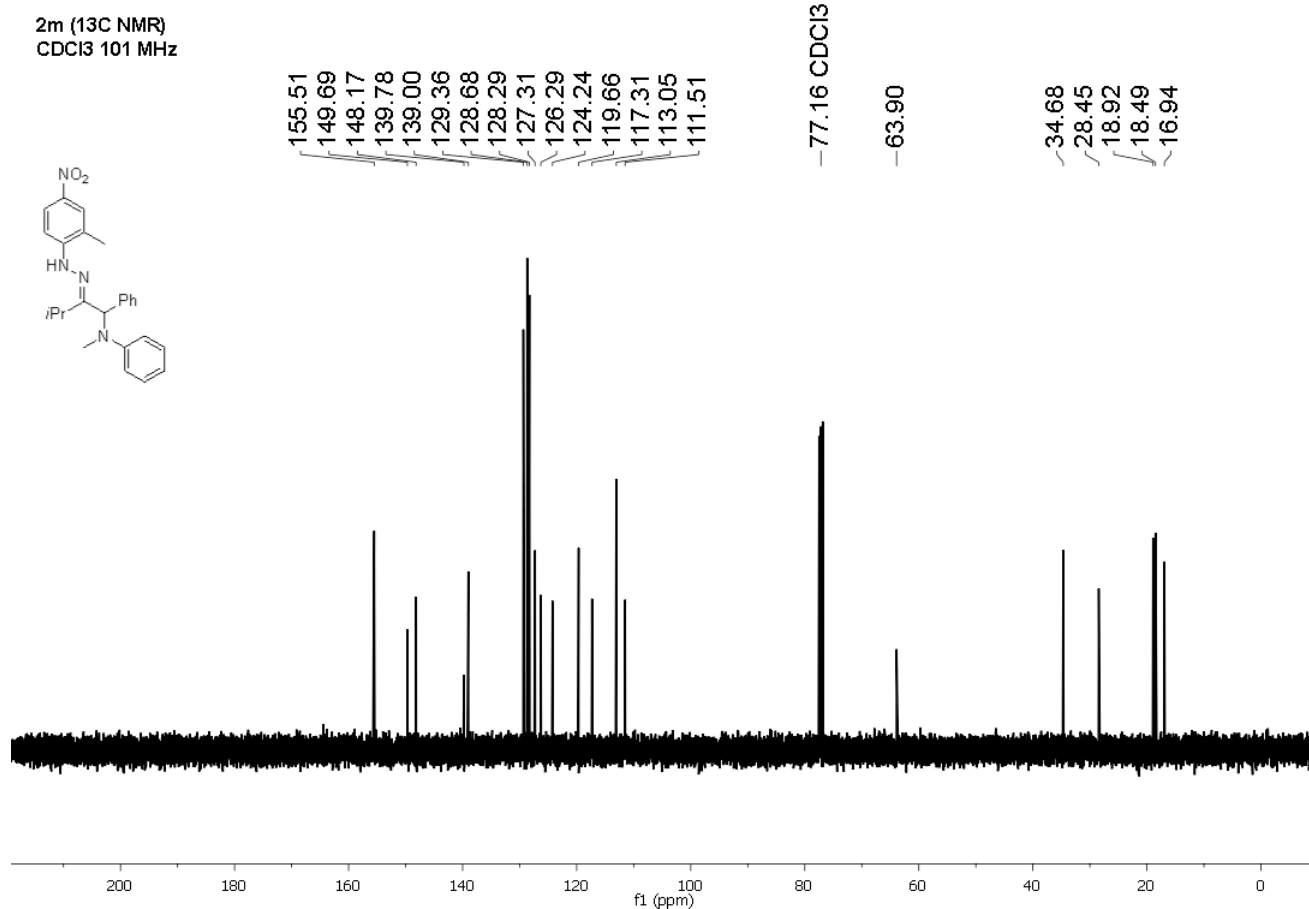

2n (1H NMR)  
DMSO-d6 400 MHz

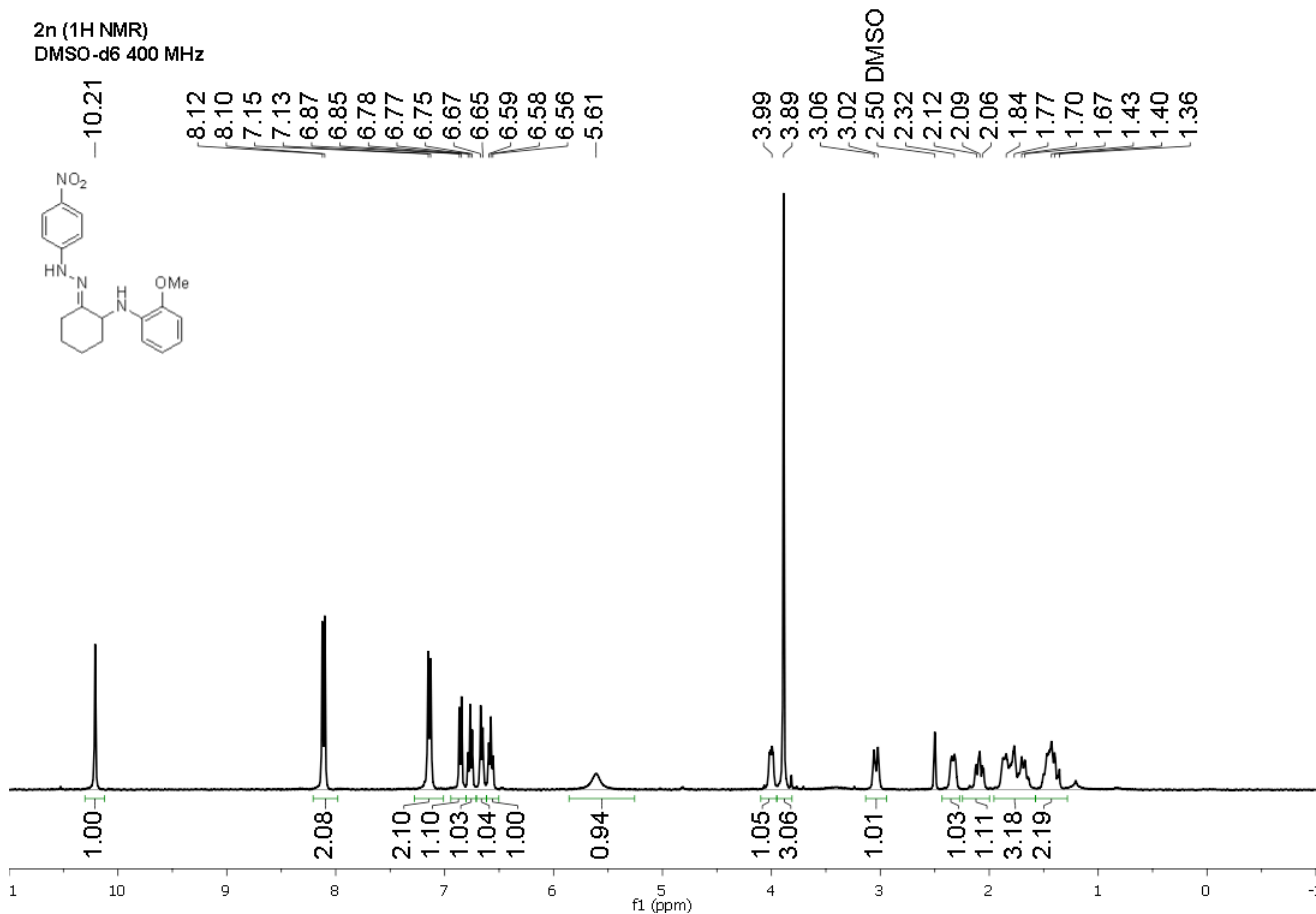

2n (13C NMR)  
DMSO-d6 101 MHz

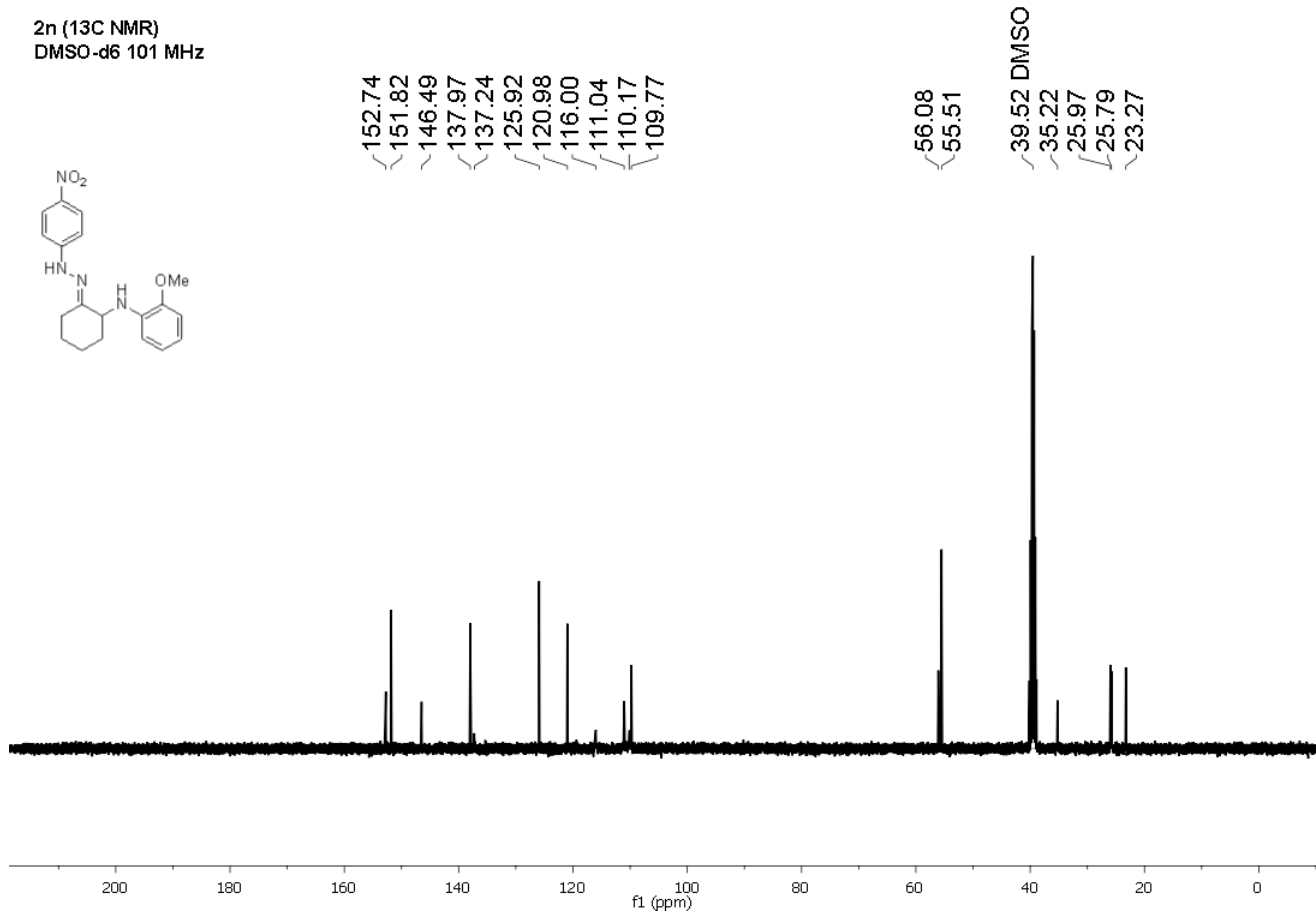

2o (1H NMR)  
CDCl3 400 MHz

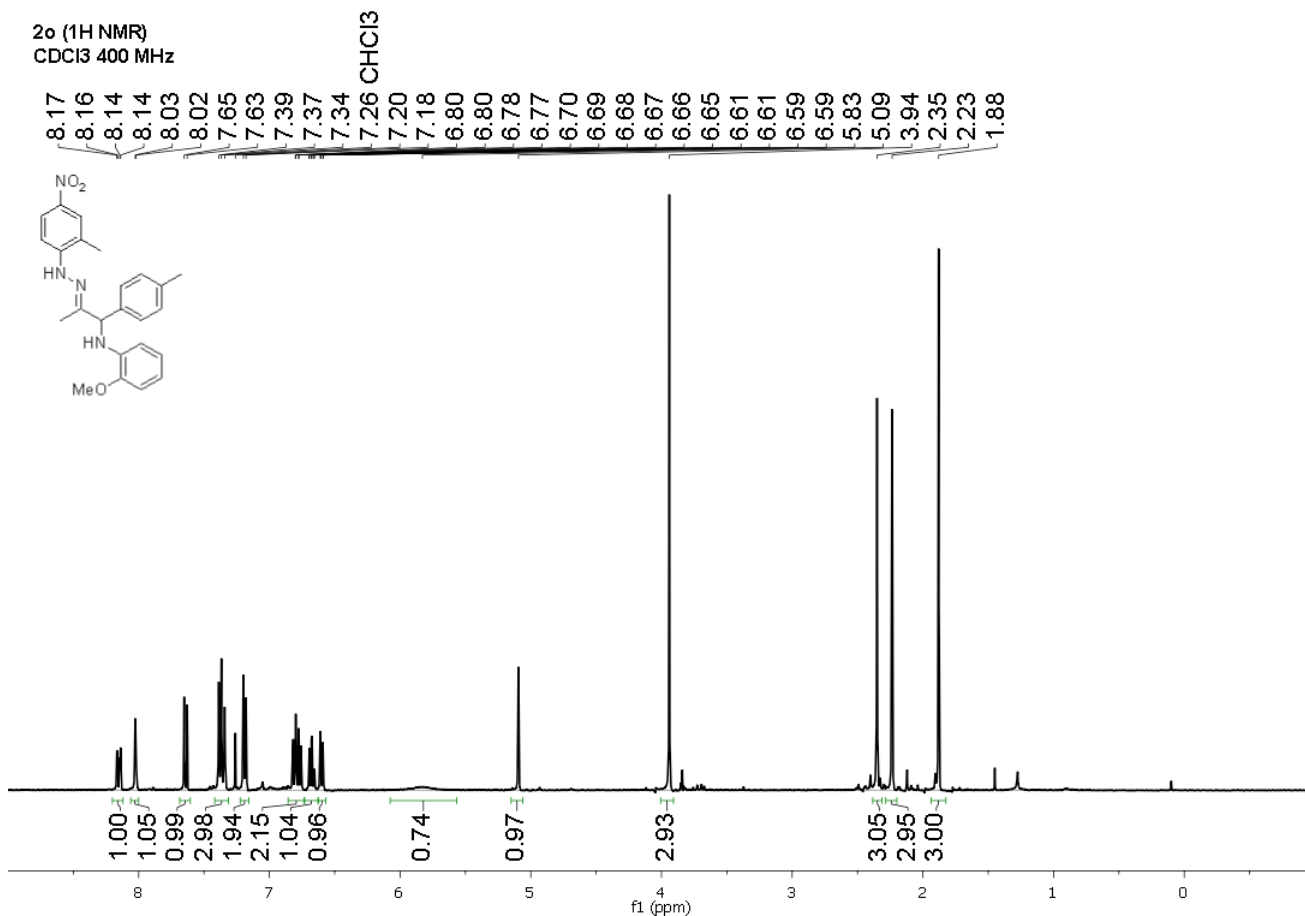

2o (13C NMR)  
CDCl3 101 MHz

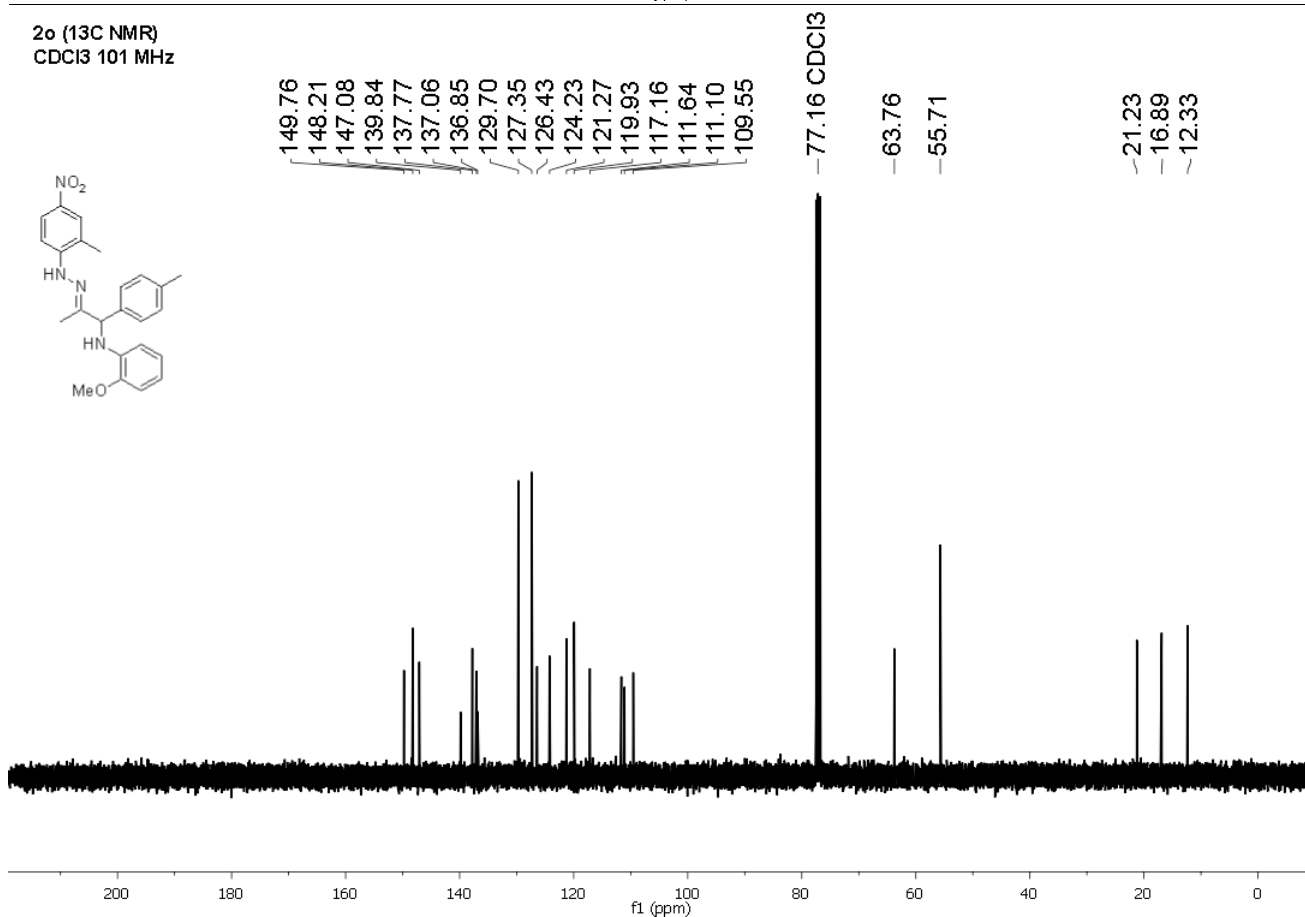

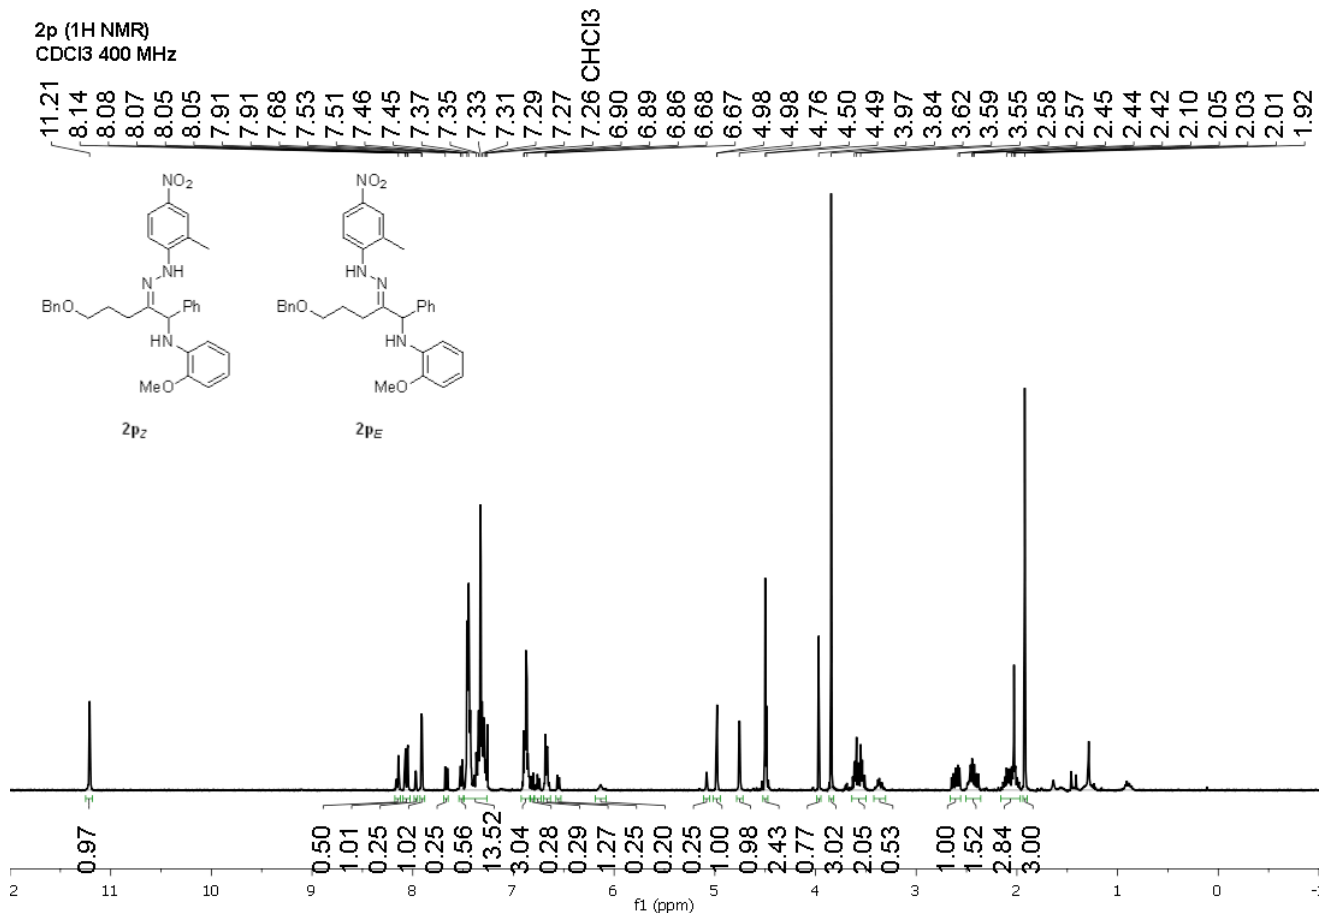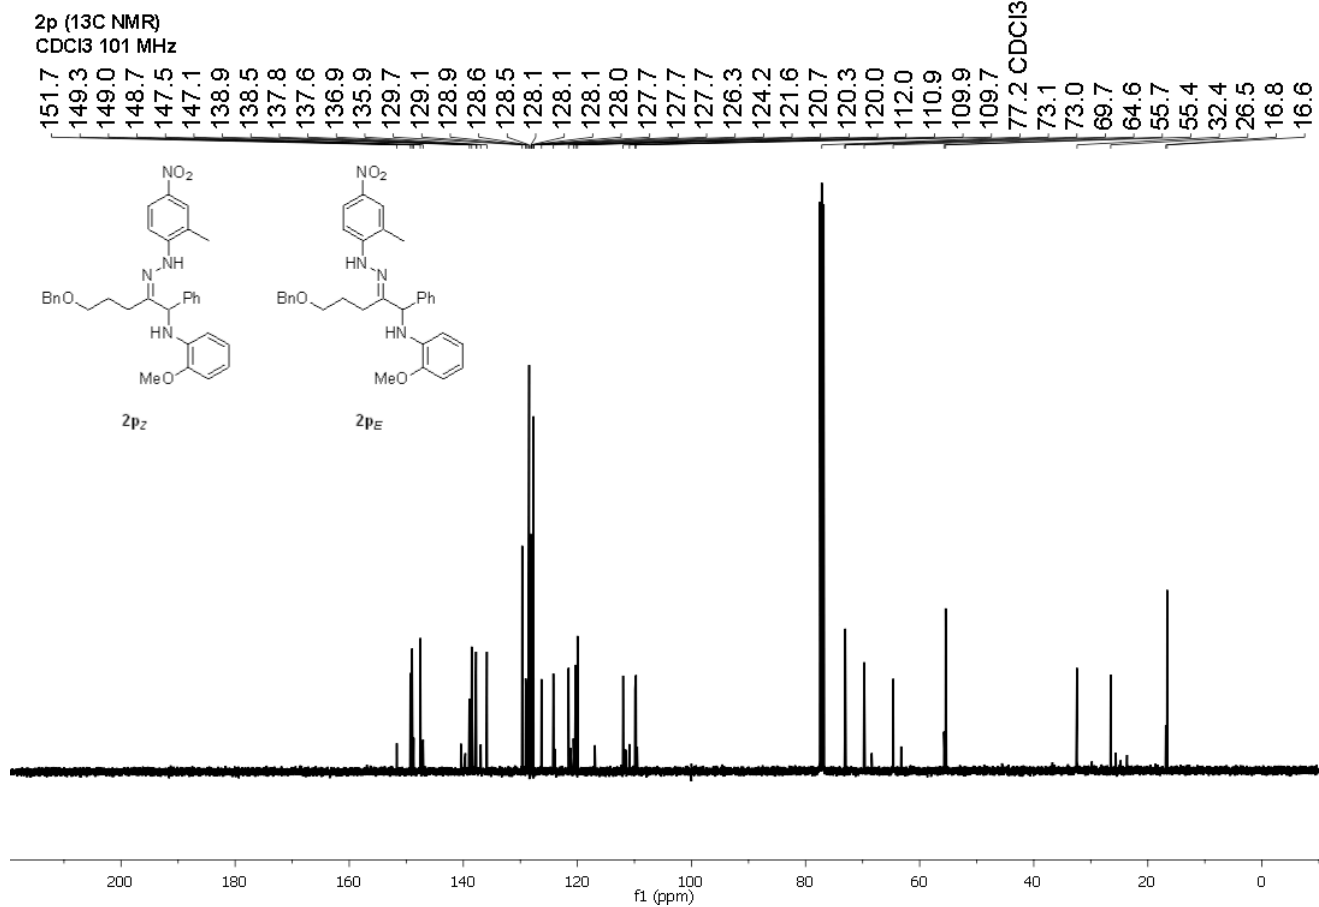

4b (1H NMR)  
CDCl3 500 MHz

7.28  
7.27  
7.26 CHCl3  
7.25  
7.23  
7.11  
7.09  
6.77  
6.75  
6.73  
6.72  
6.71  
6.71  
6.70  
6.69  
6.64  
6.64  
6.63  
6.62  
6.61  
6.61  
6.40  
6.40  
6.39  
6.39  
5.99  
5.98  
5.09  
5.08  
3.90  
2.87  
2.85  
2.84  
2.34  
1.16  
1.15  
0.83  
0.81

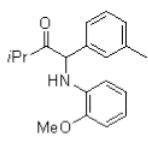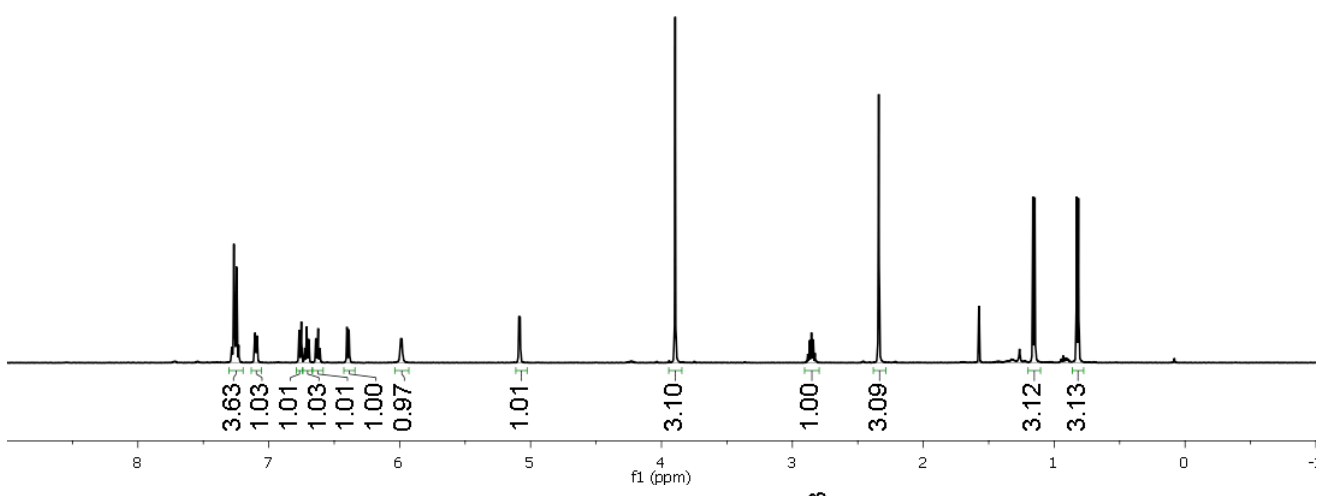

4b (13C NMR)  
CDCl3 126 MHz

210.4  
147.1  
138.9  
138.1  
136.3  
129.2  
129.0  
128.6  
125.4  
121.0  
116.9  
110.6  
109.5  
-77.2 CDCl3  
66.3  
55.6  
37.0  
21.6  
19.7  
18.5

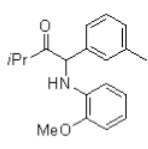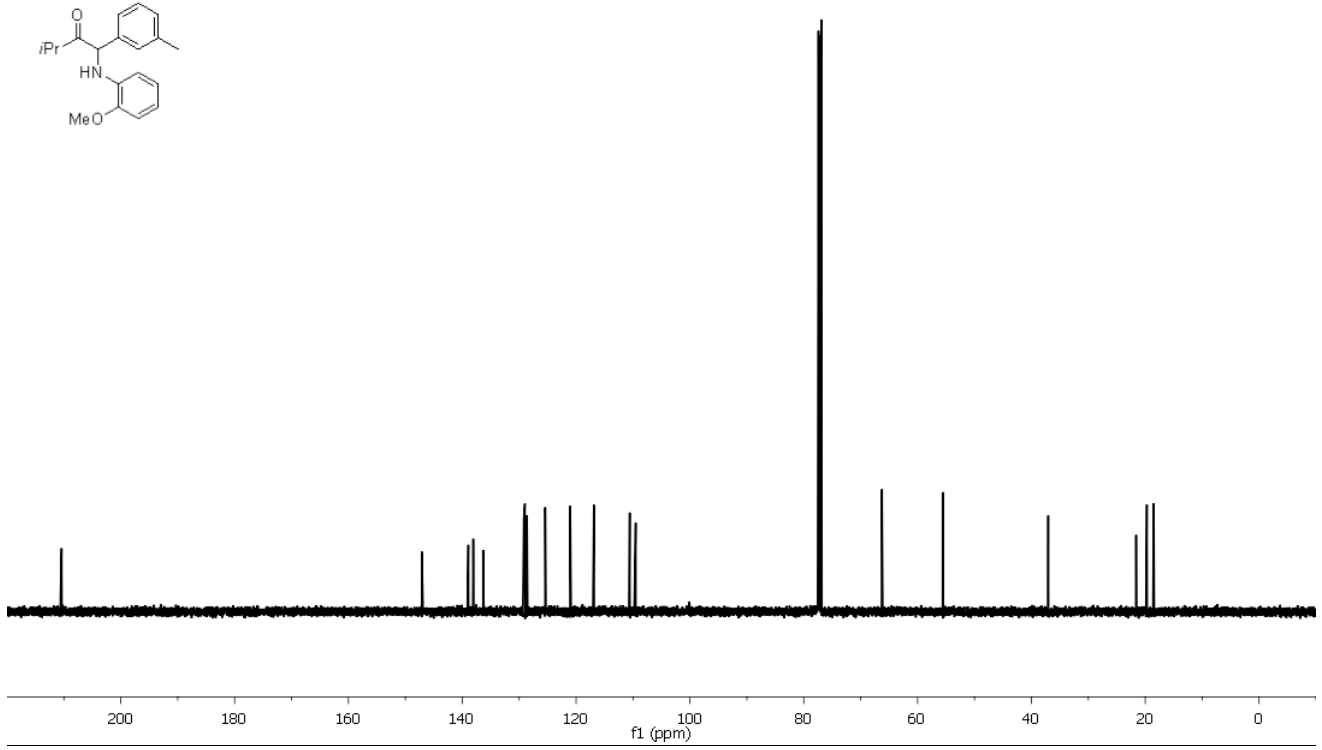

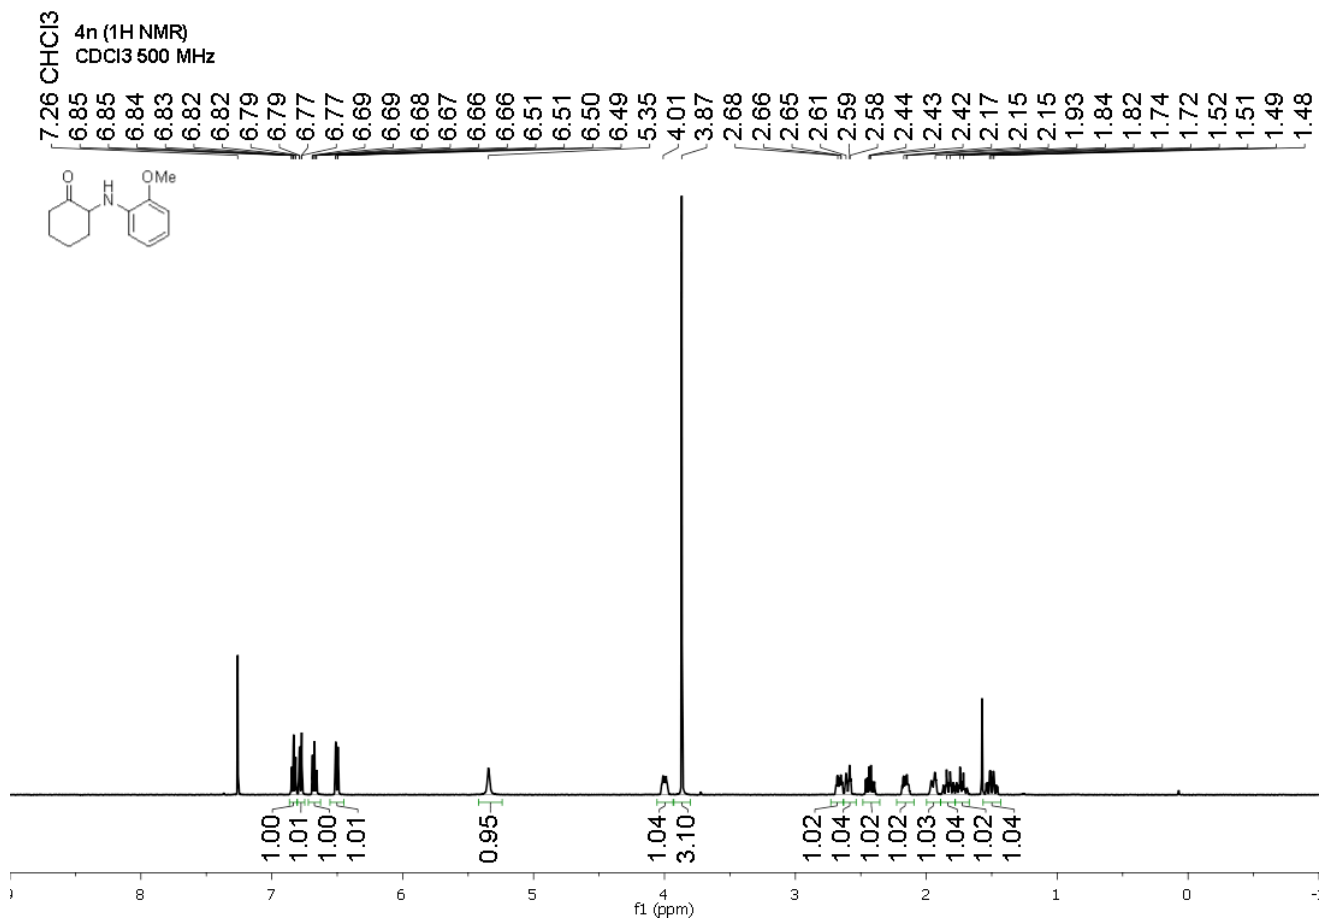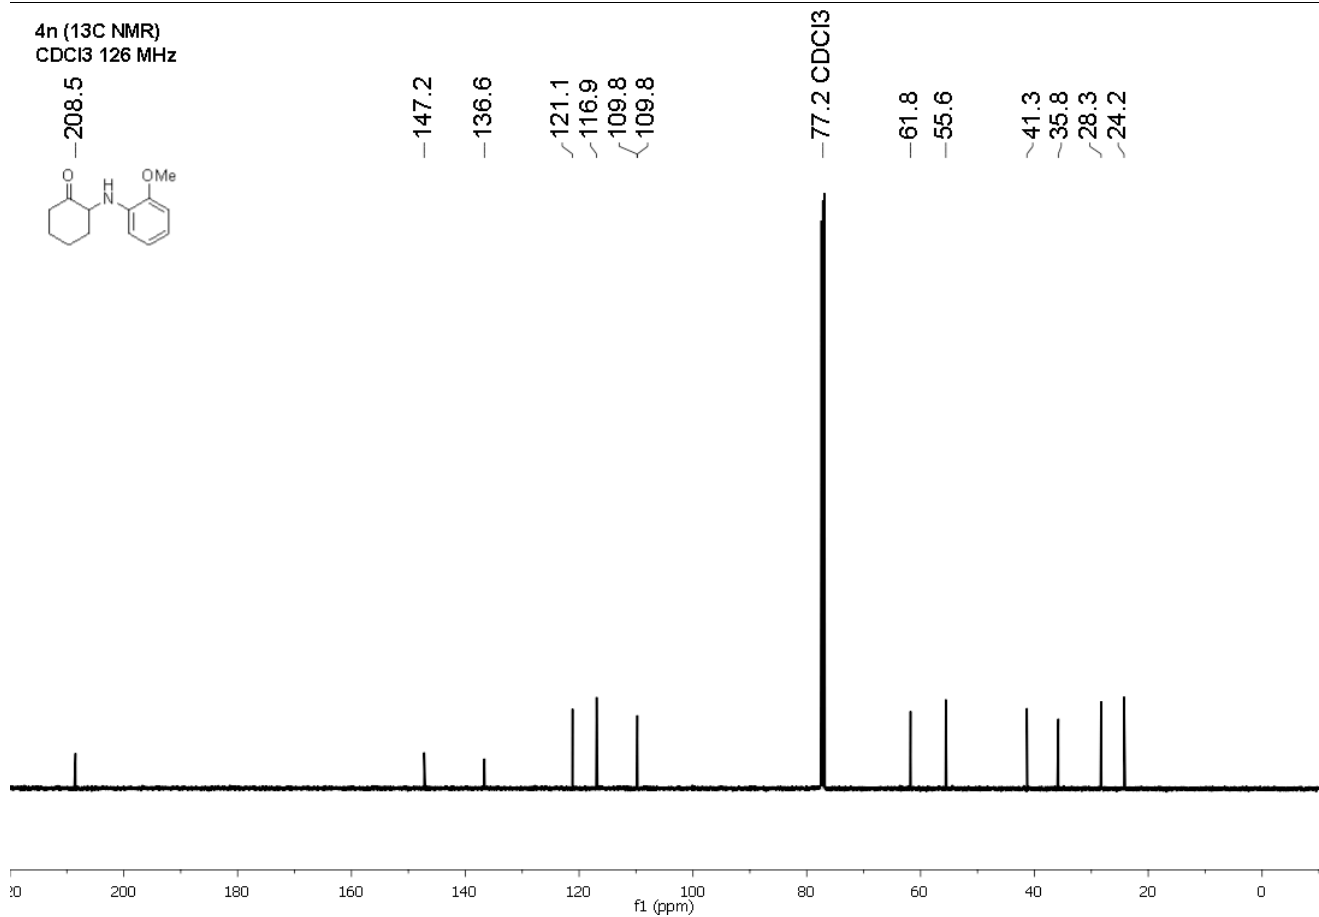

4o (1H NMR)  
CDCl3 500 MHz

7.35  
7.34  
7.26 CHCl3  
7.18  
7.16  
6.76  
6.76  
6.75  
6.75  
6.71  
6.71  
6.69  
6.69  
6.68  
6.68  
6.64  
6.64  
6.62  
6.62  
6.61  
6.61  
6.34  
6.34  
6.33  
6.32  
5.86  
5.86  
4.96  
4.95  
3.89  
2.33  
2.14

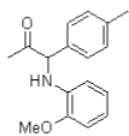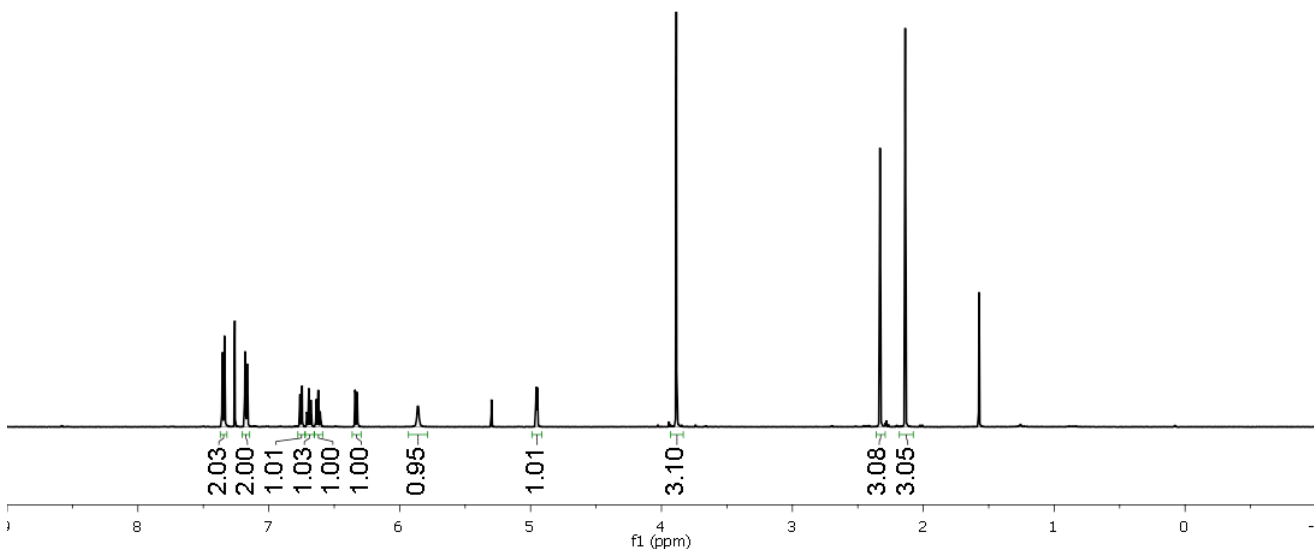

4o (13C NMR)  
CDCl3 126 MHz

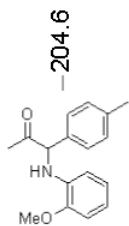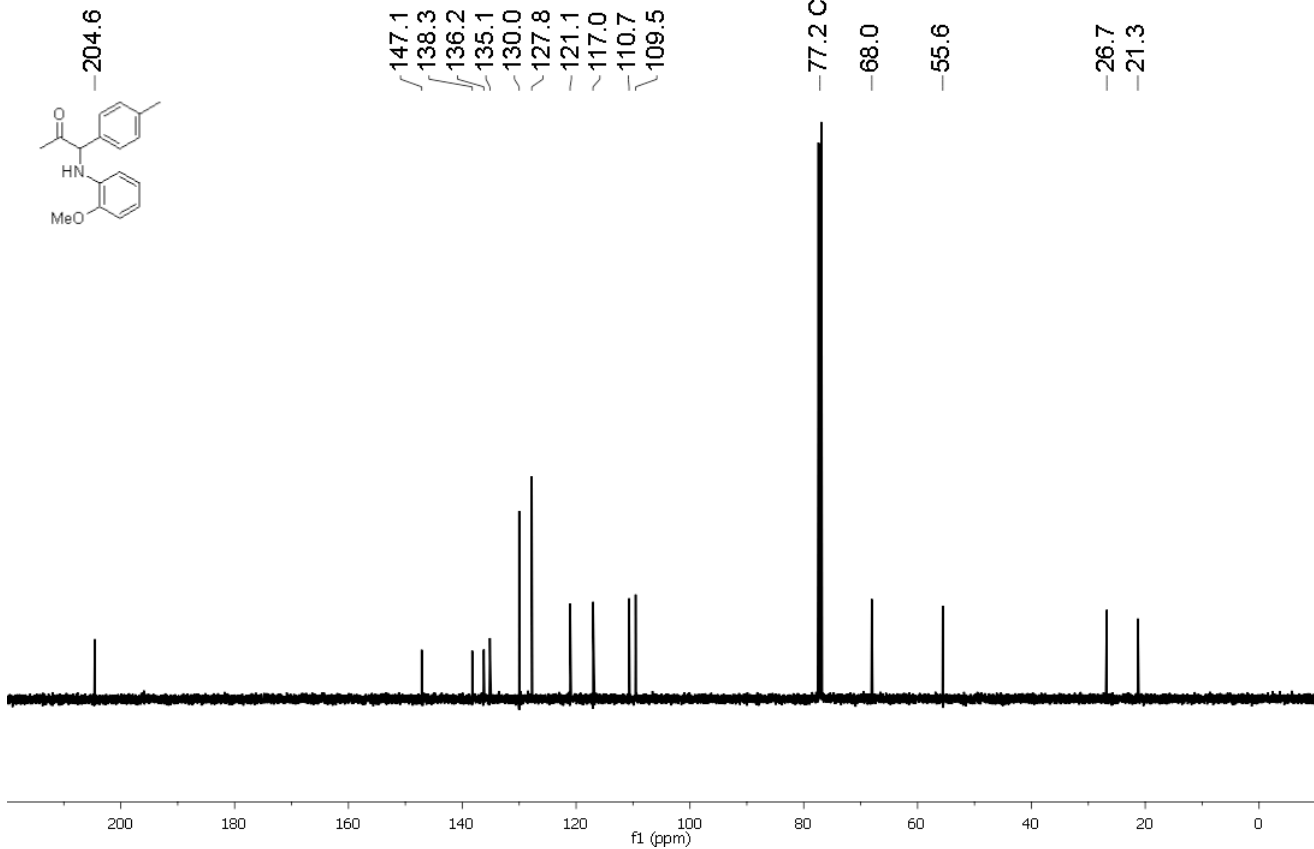

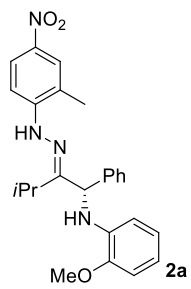

Enantioenriched

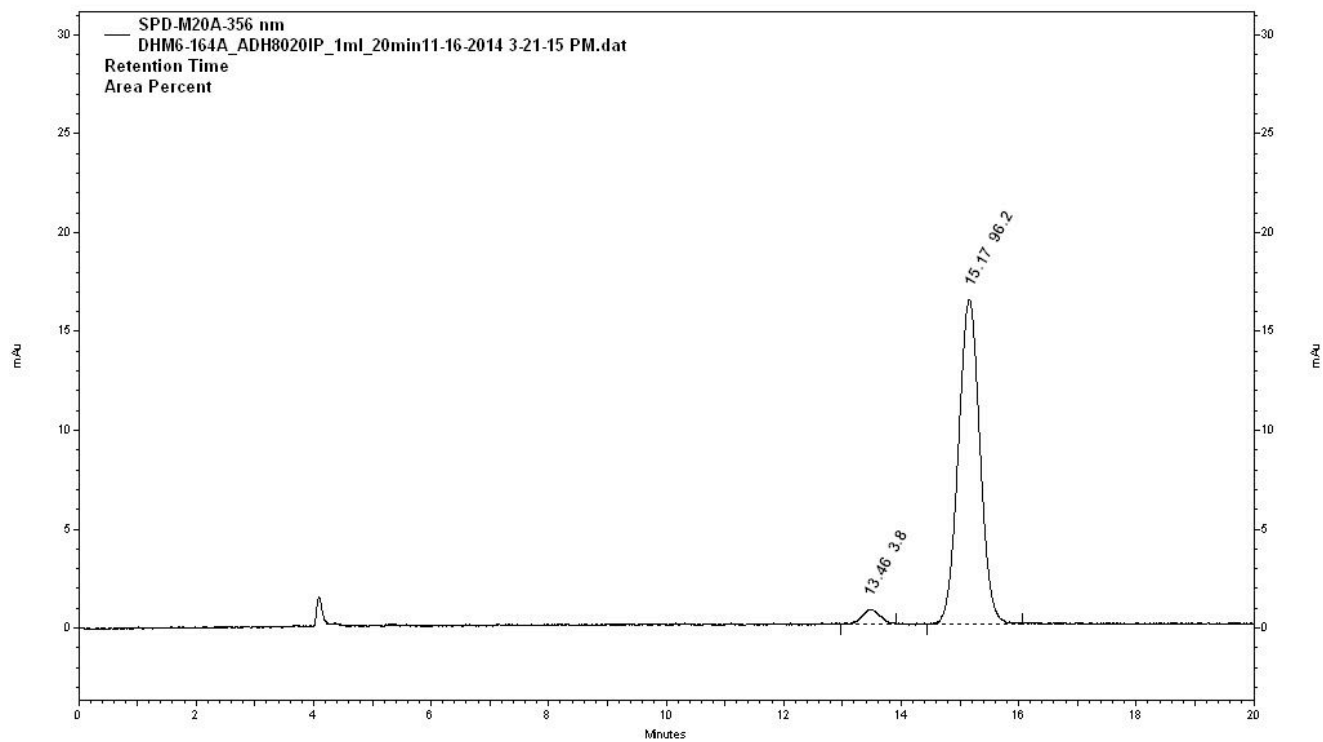

Racemic

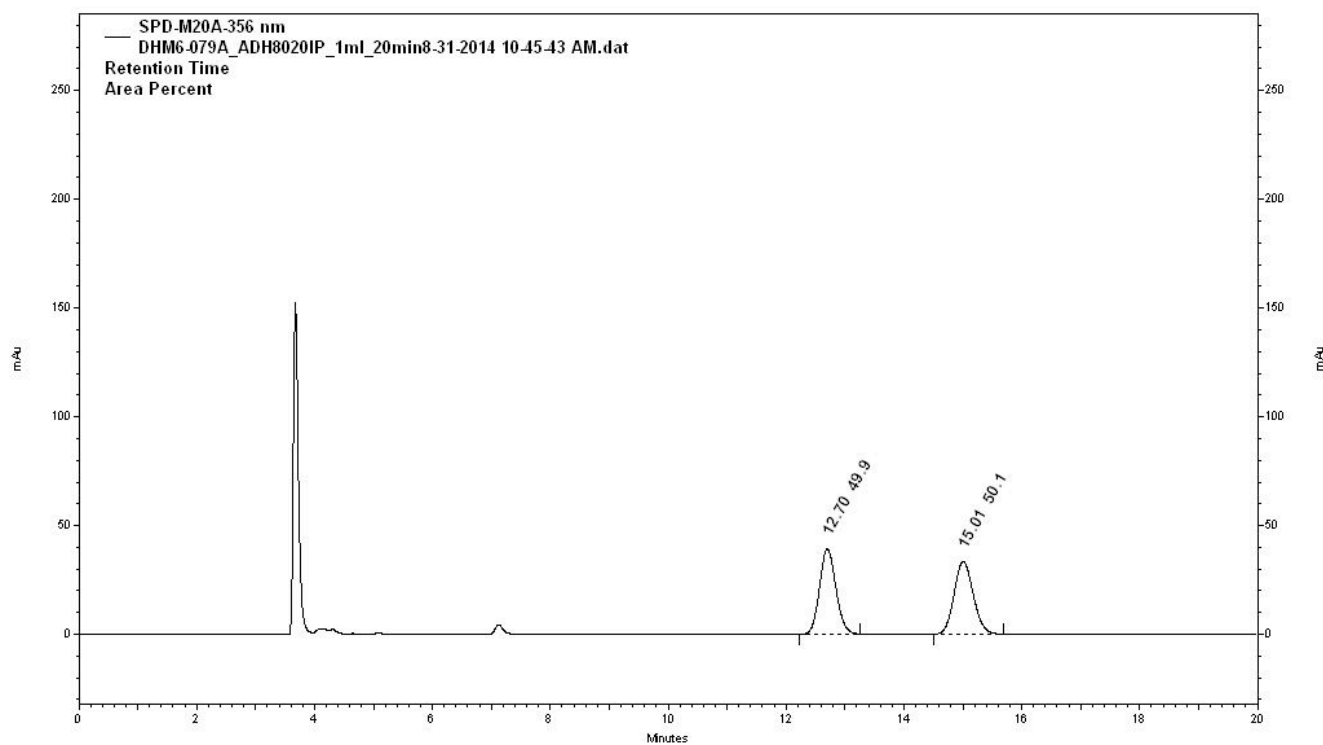



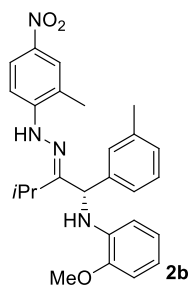

Enantioenriched

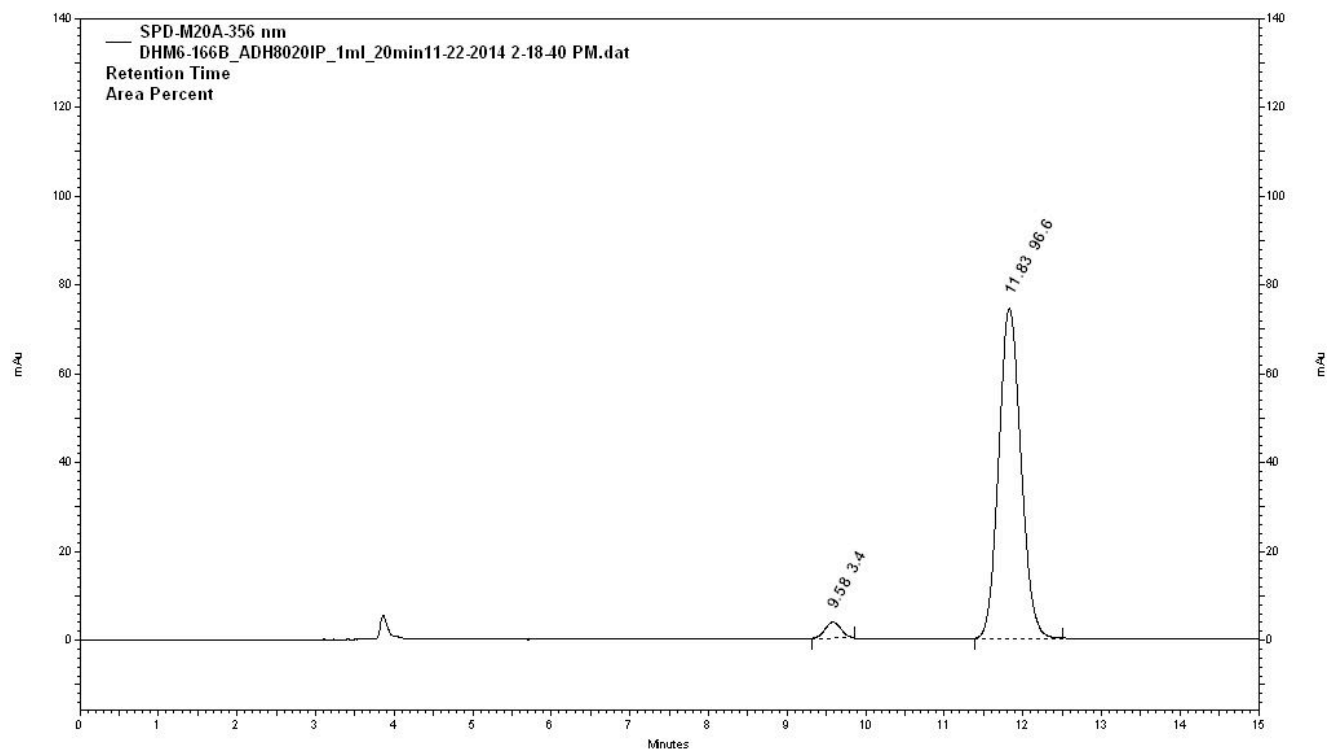

Racemic

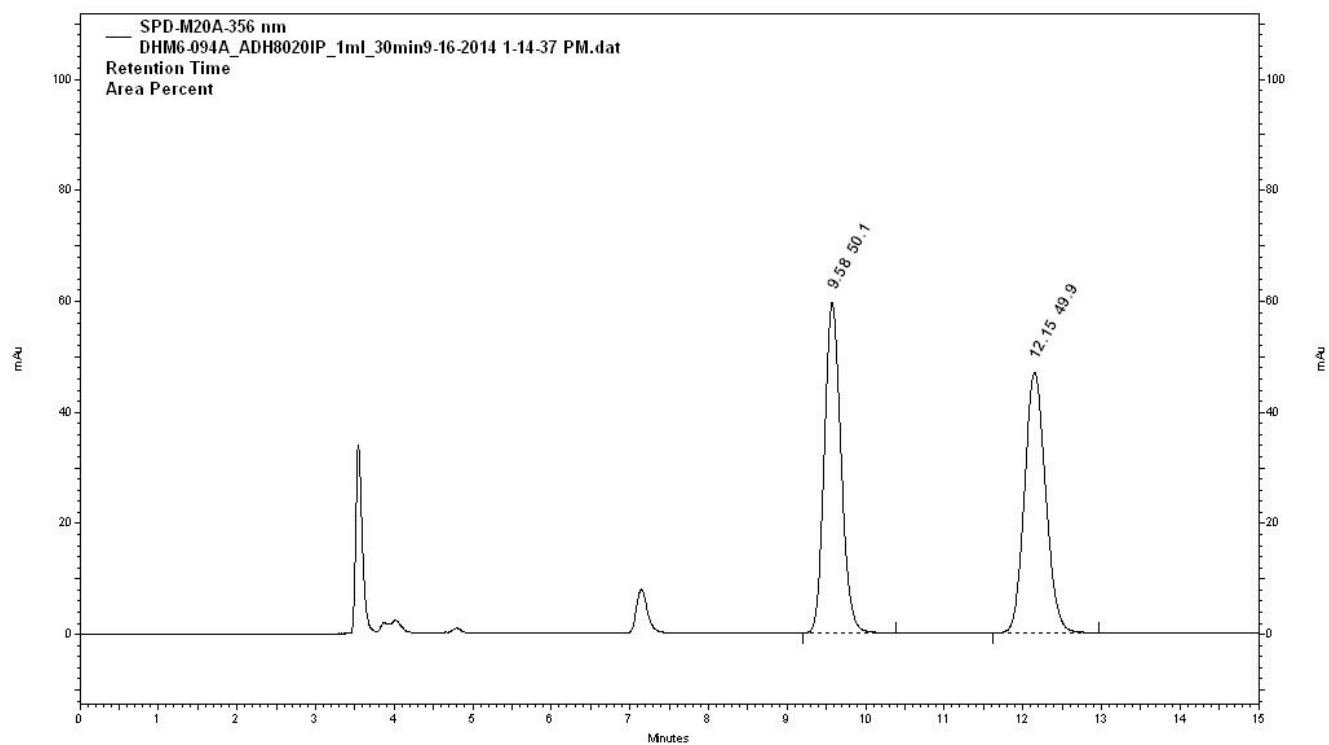

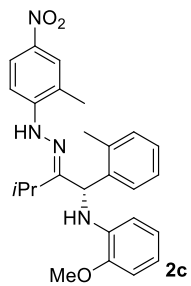

Enantioenriched

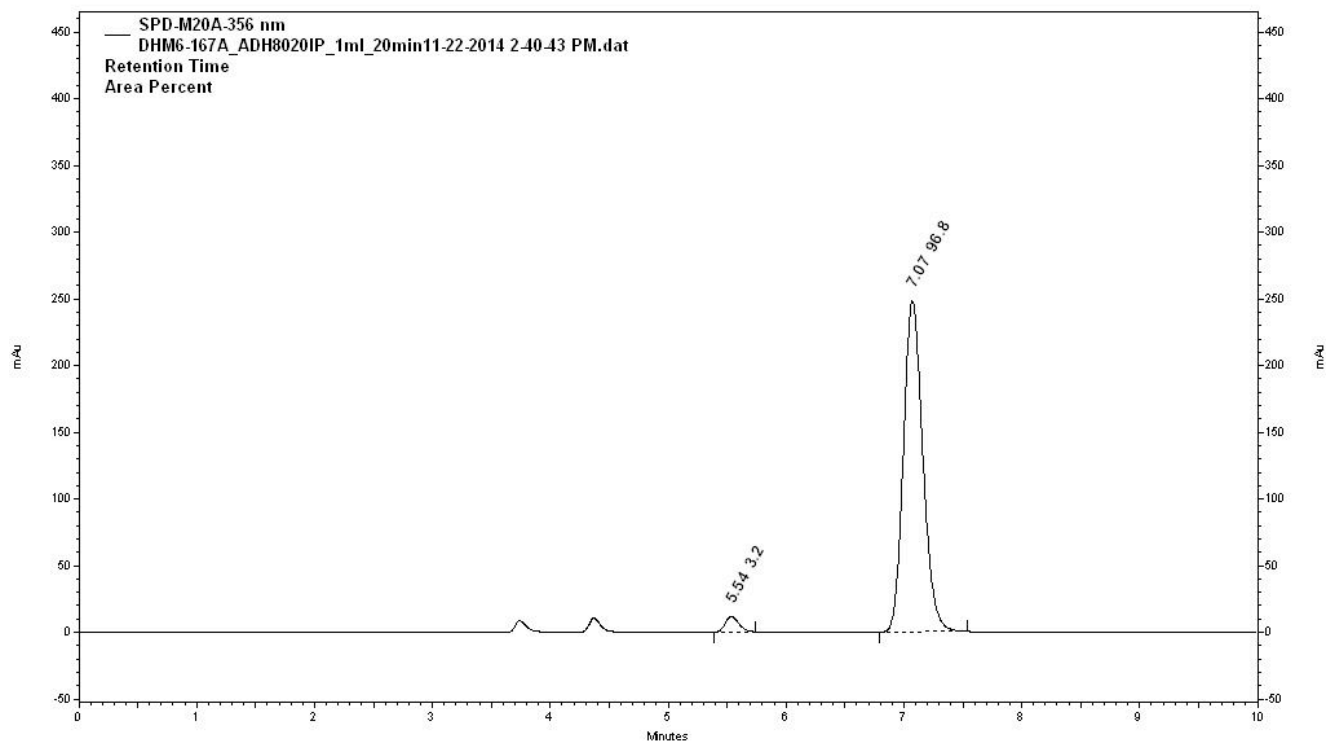

Racemic

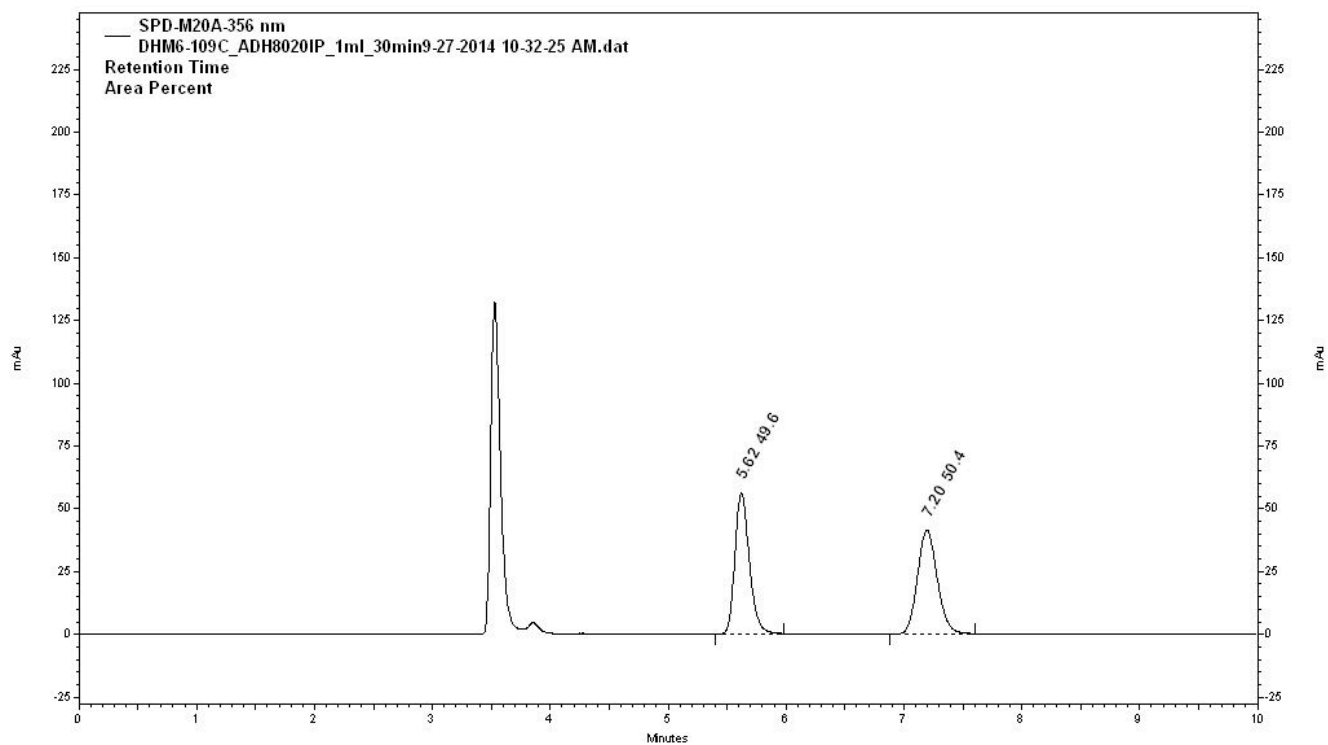

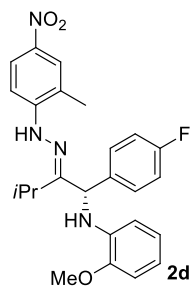

Enantioenriched

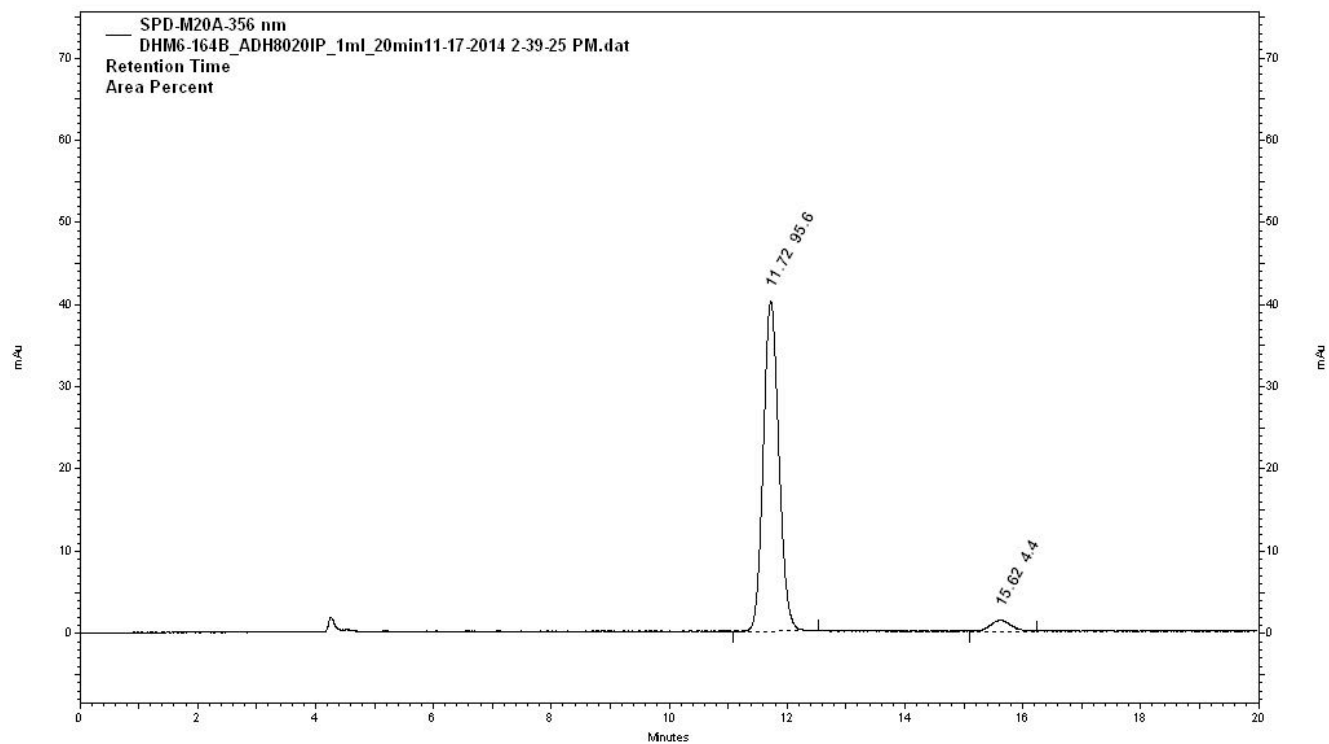

Racemic

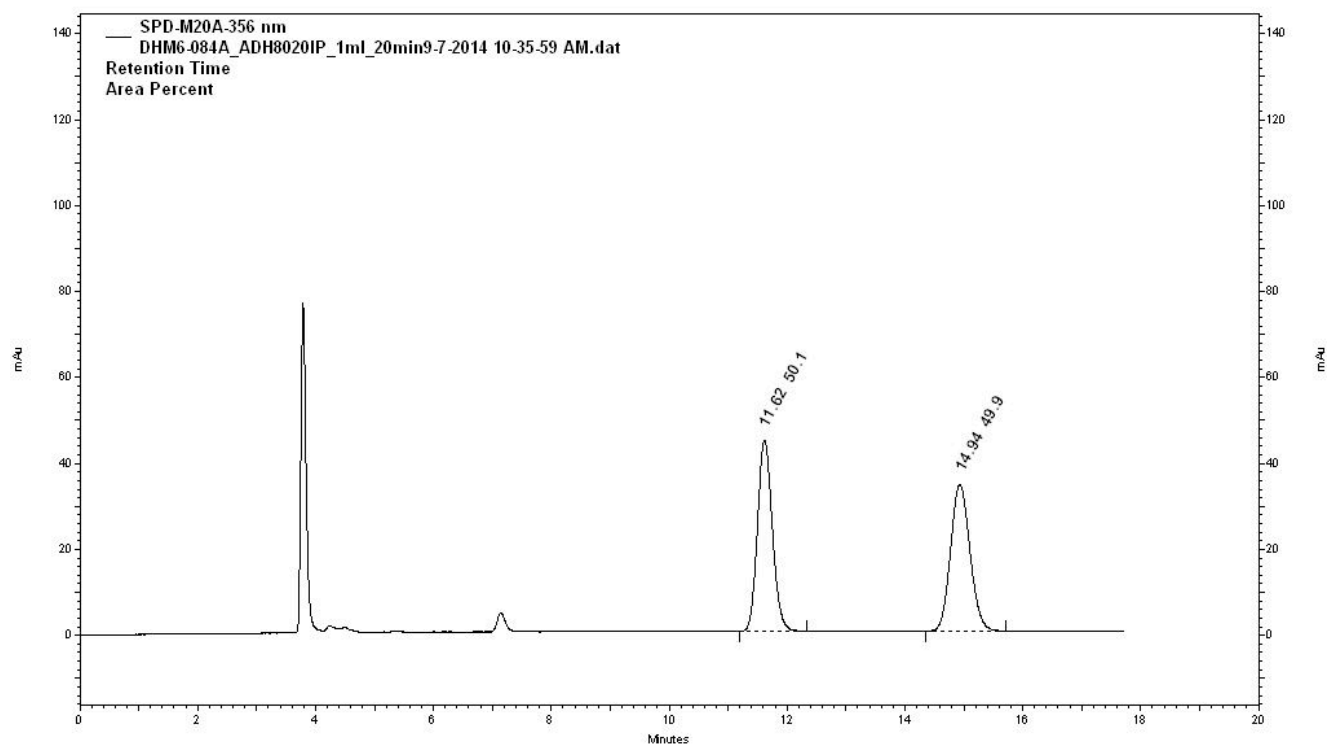

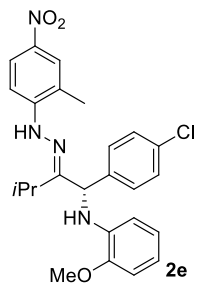

Enantioenriched

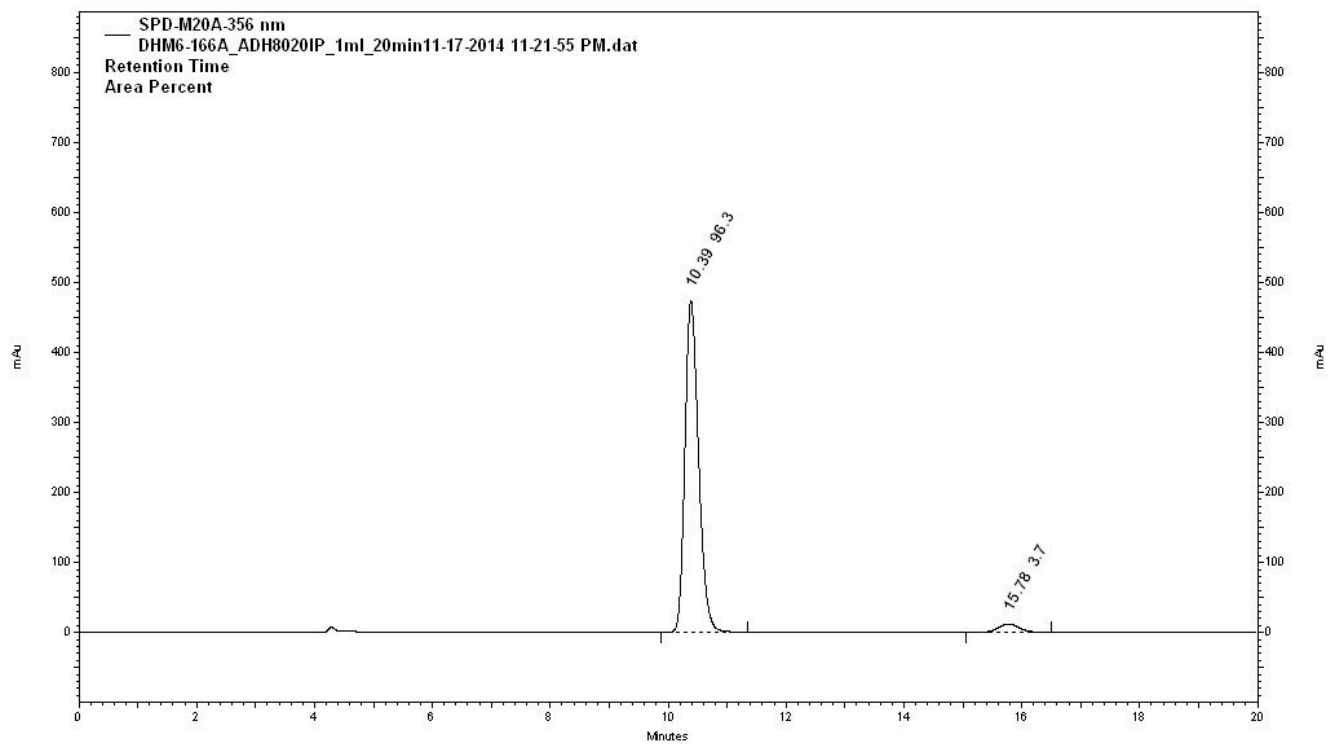

Racemic

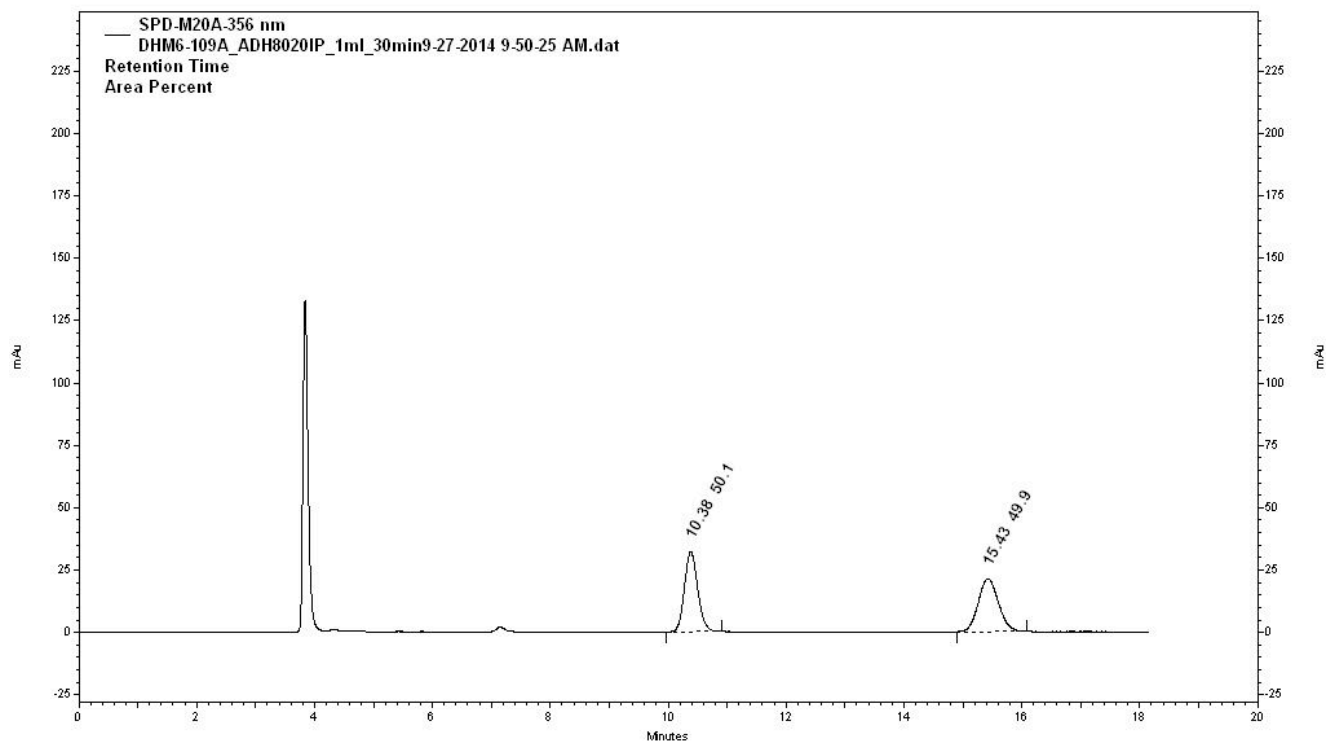

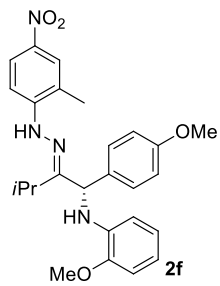

Enantioenriched

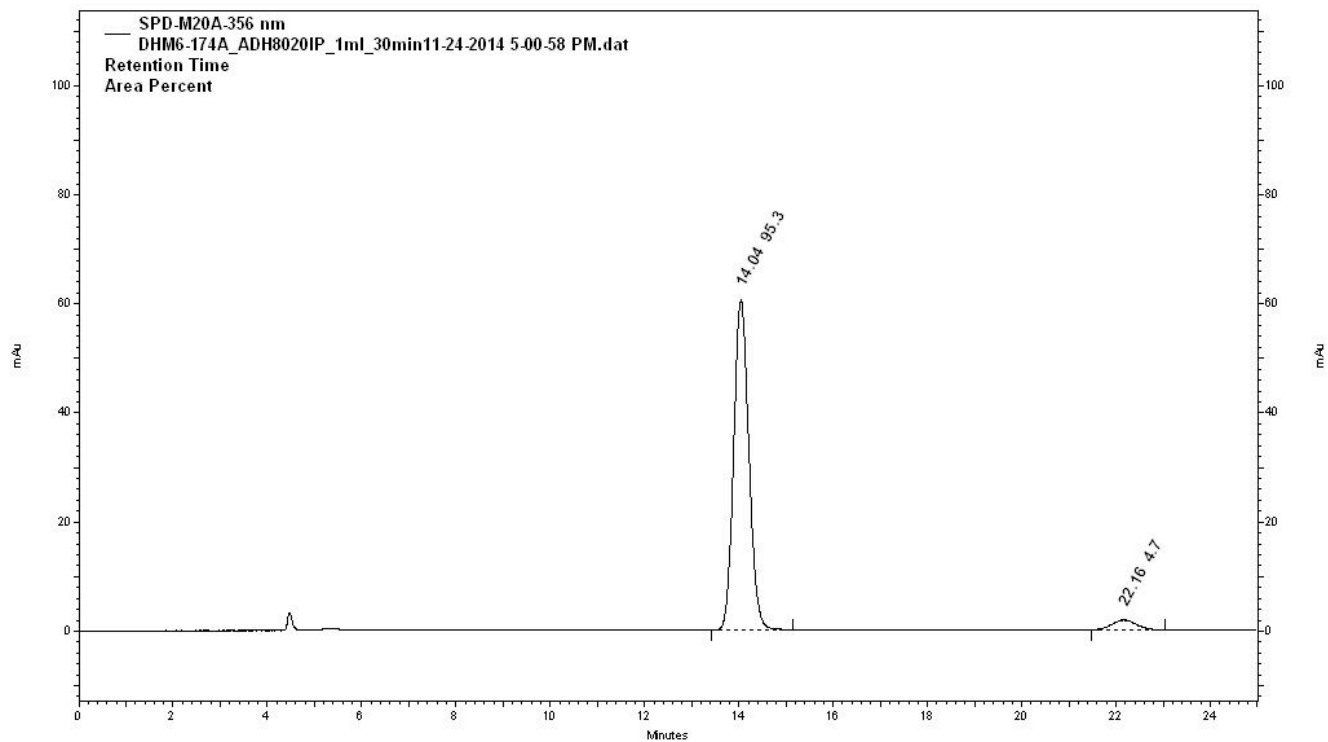

Racemic

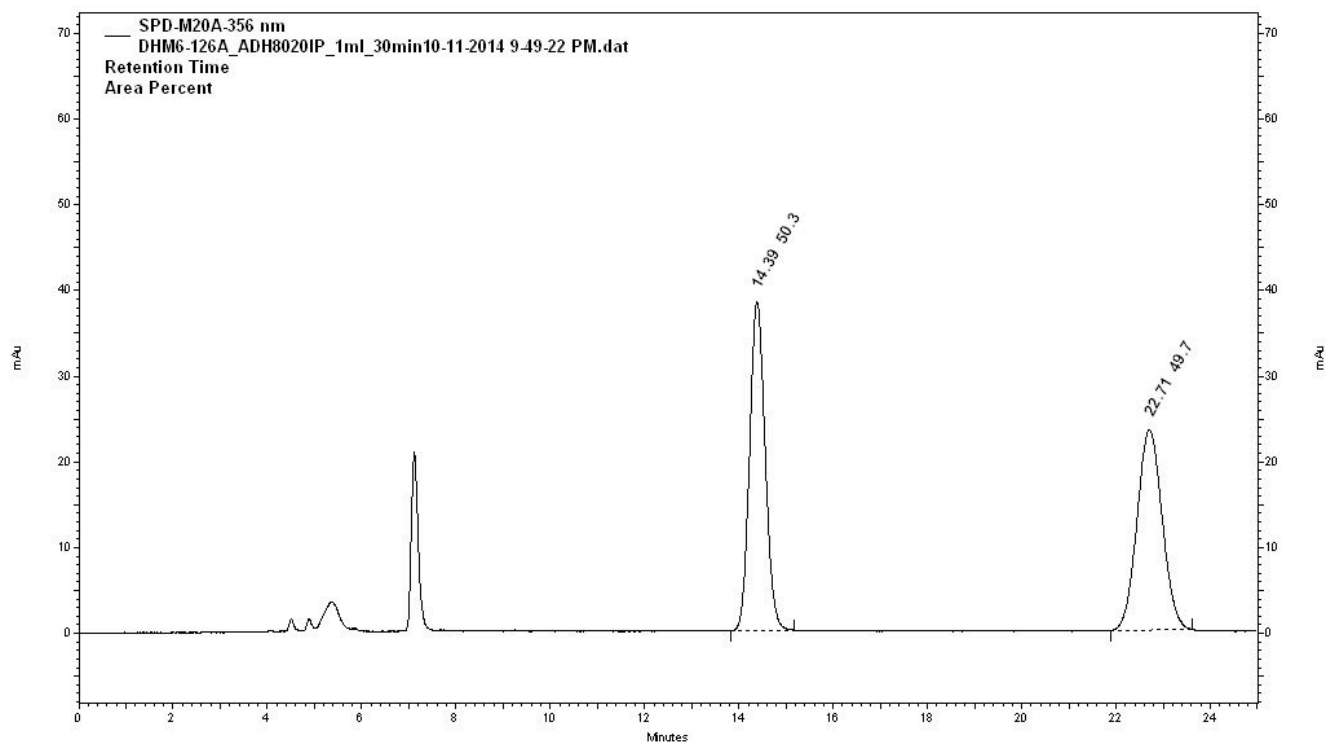

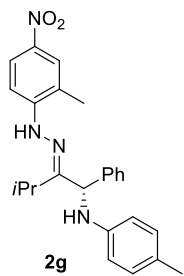

Enantioenriched

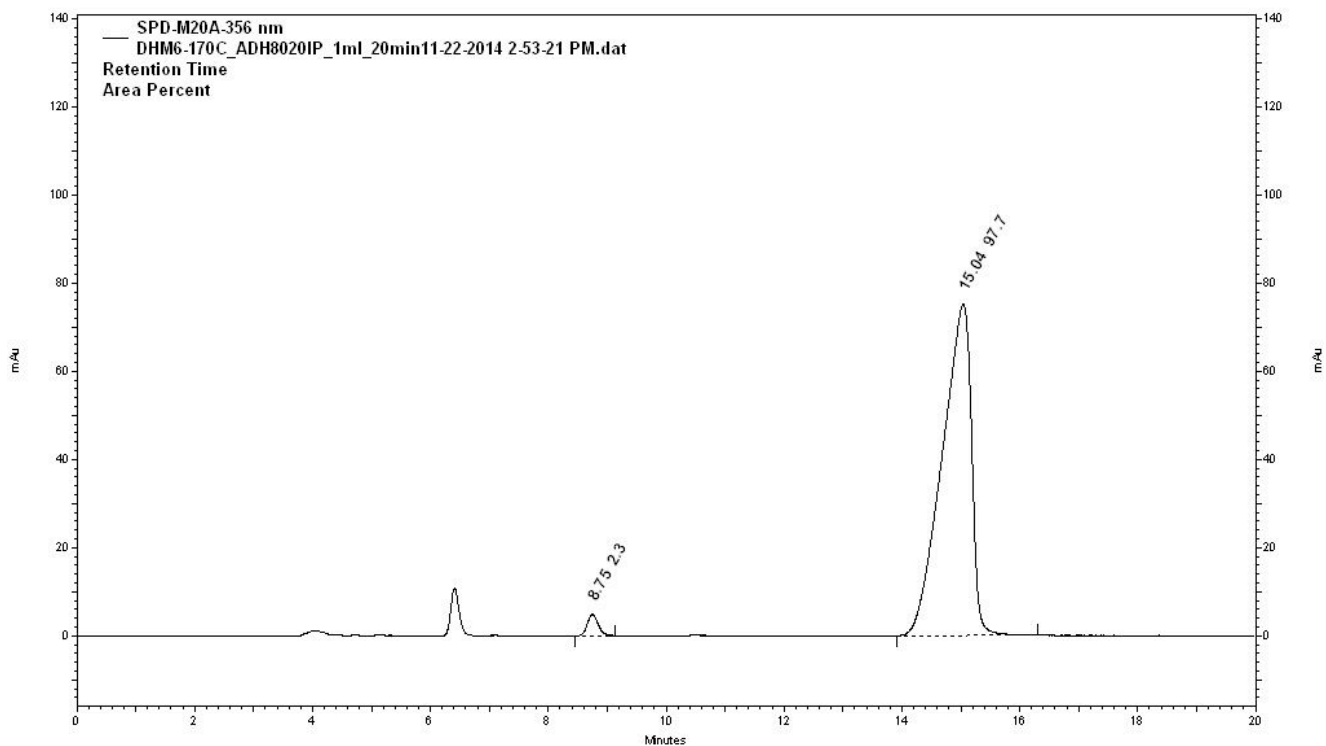

Racemic

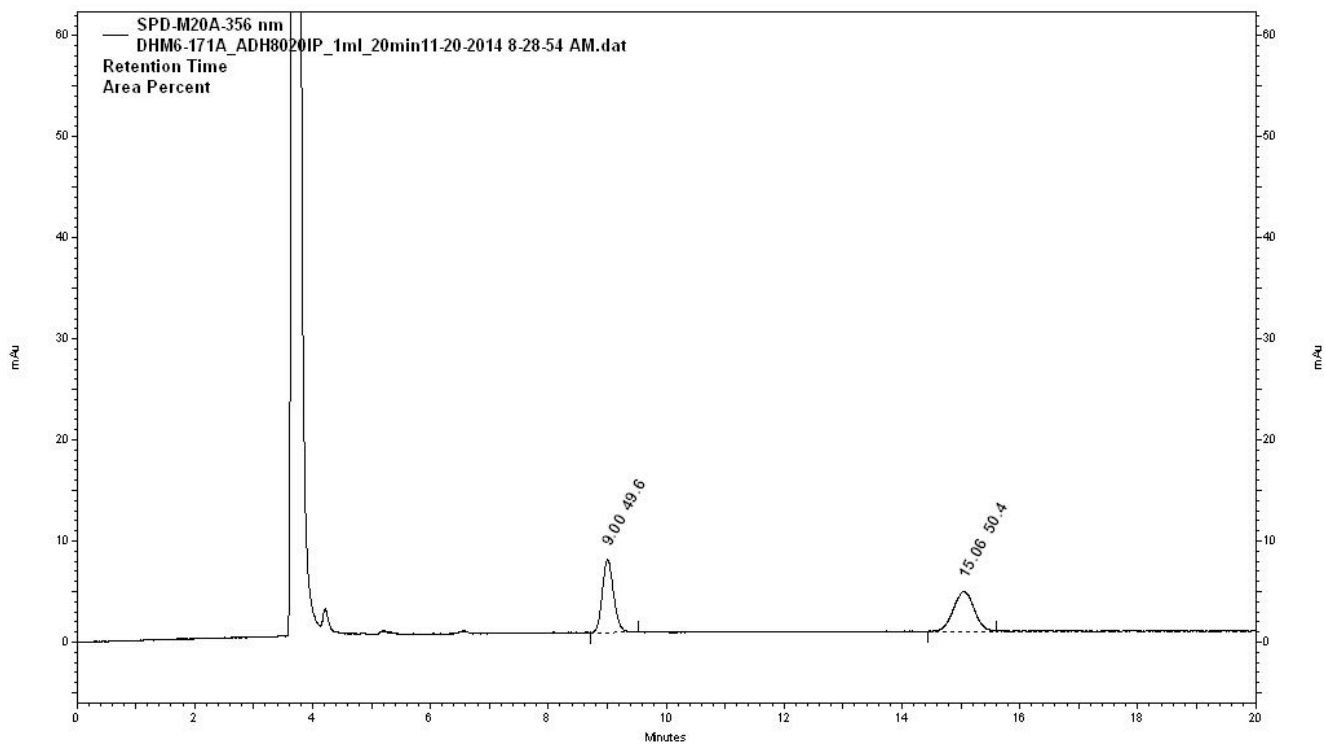

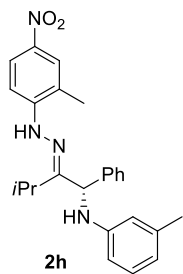

Enantioenriched

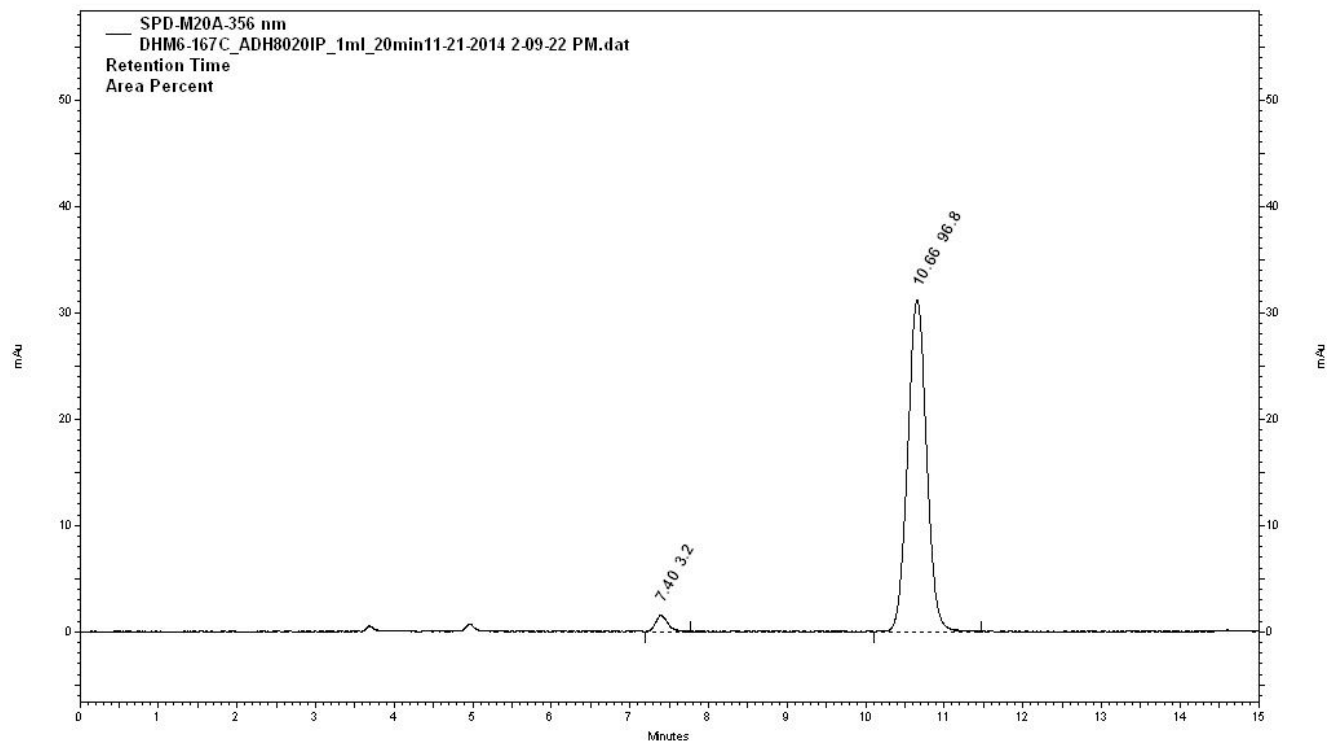

Racemic

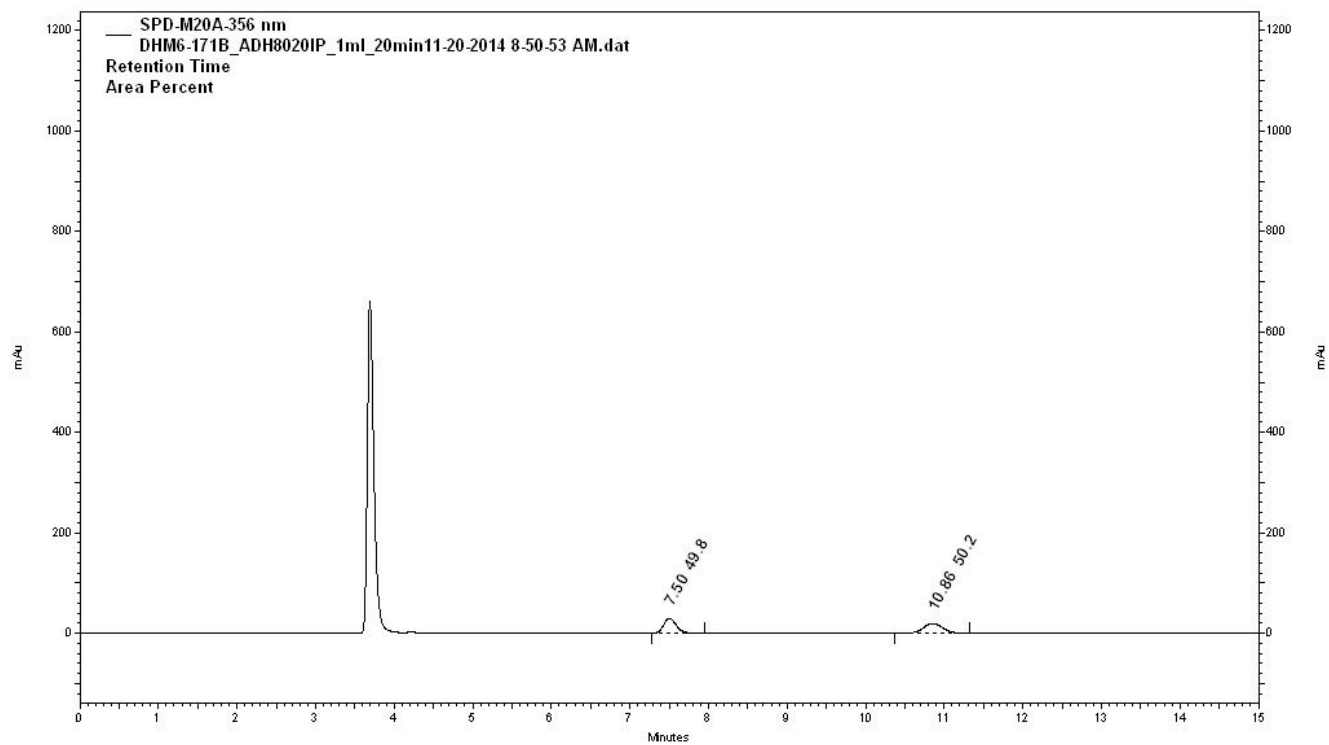

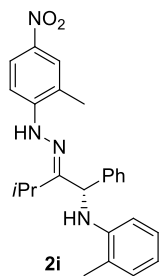

Enantioenriched

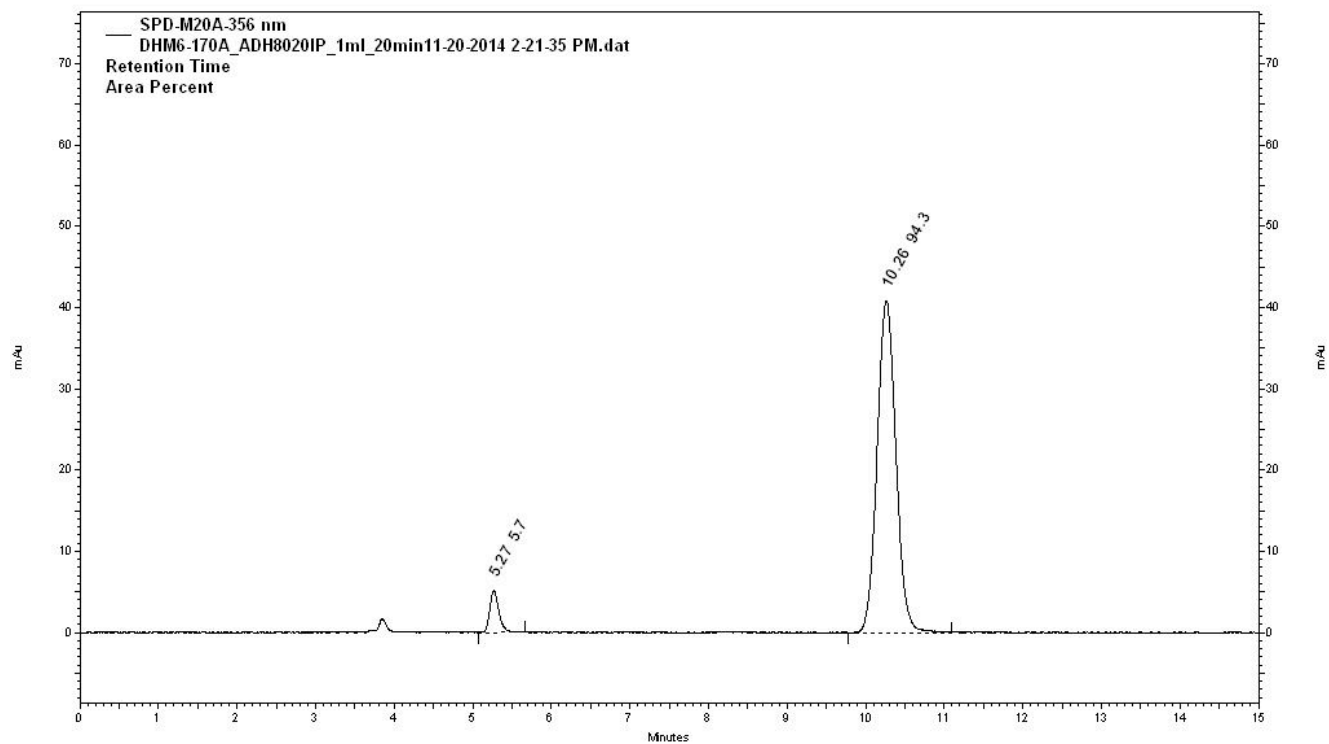

Racemic

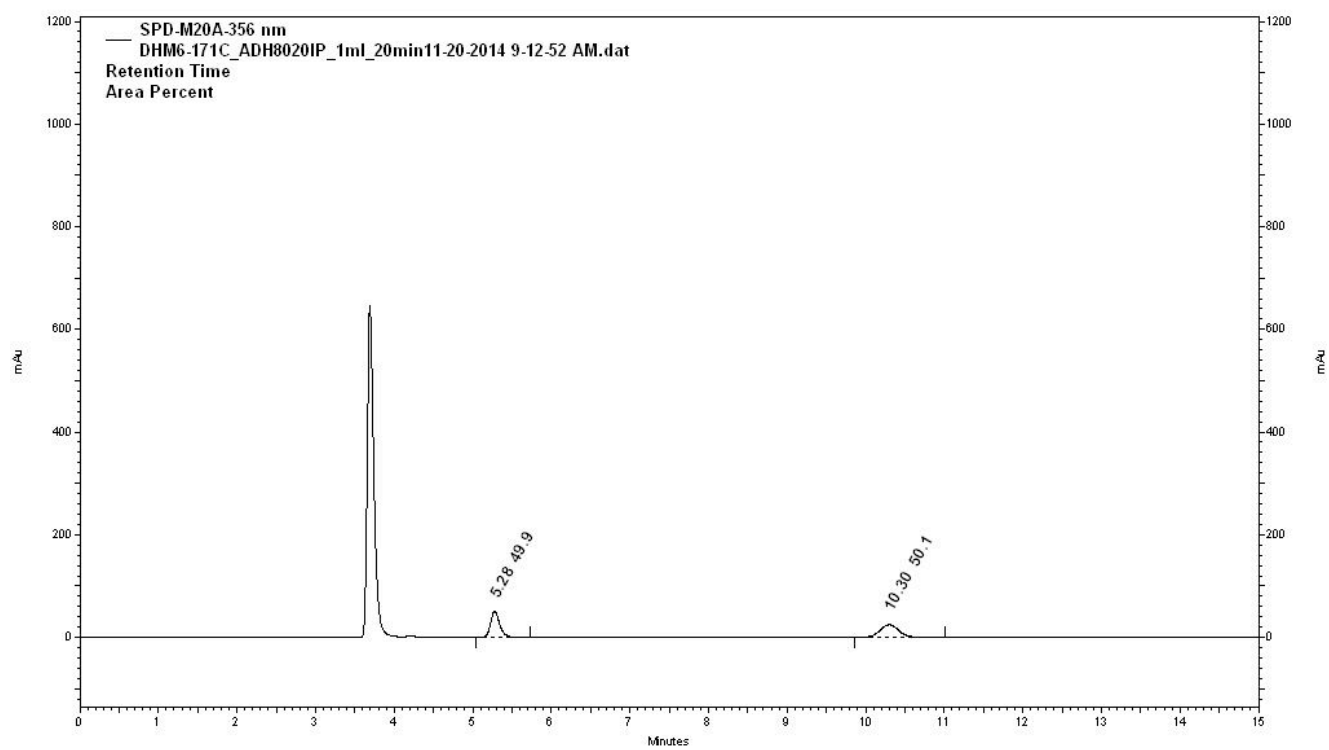



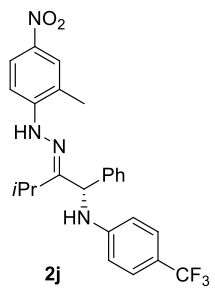

Enantioenriched

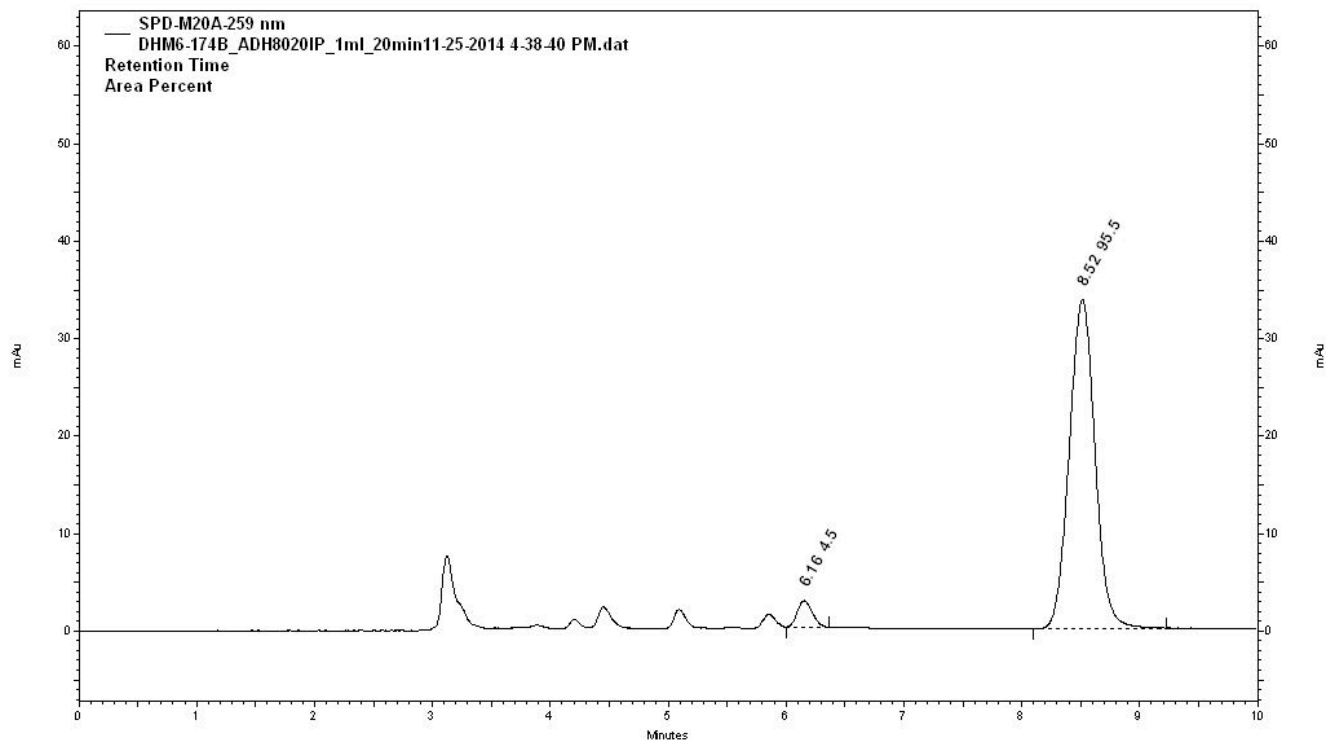

Racemic

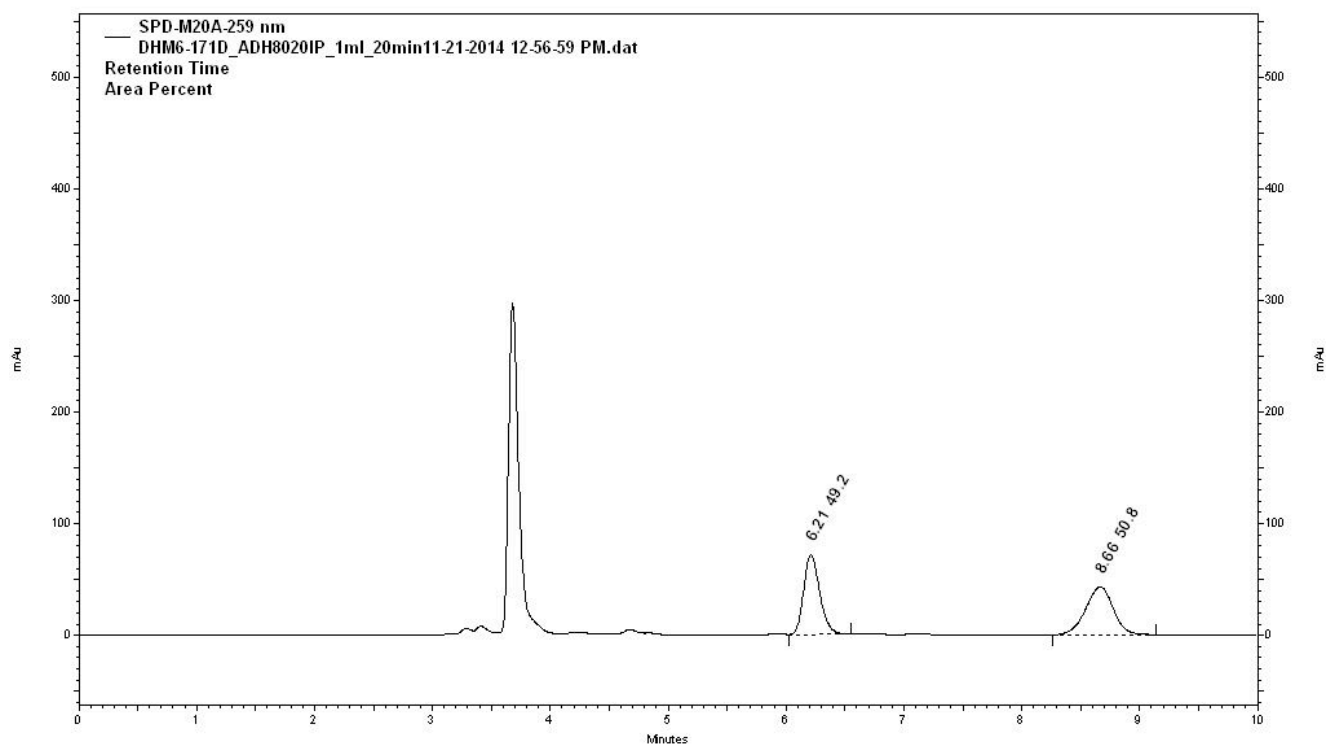

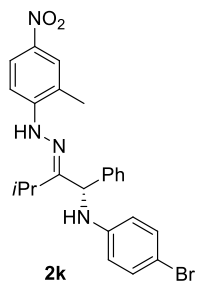

Enantioenriched

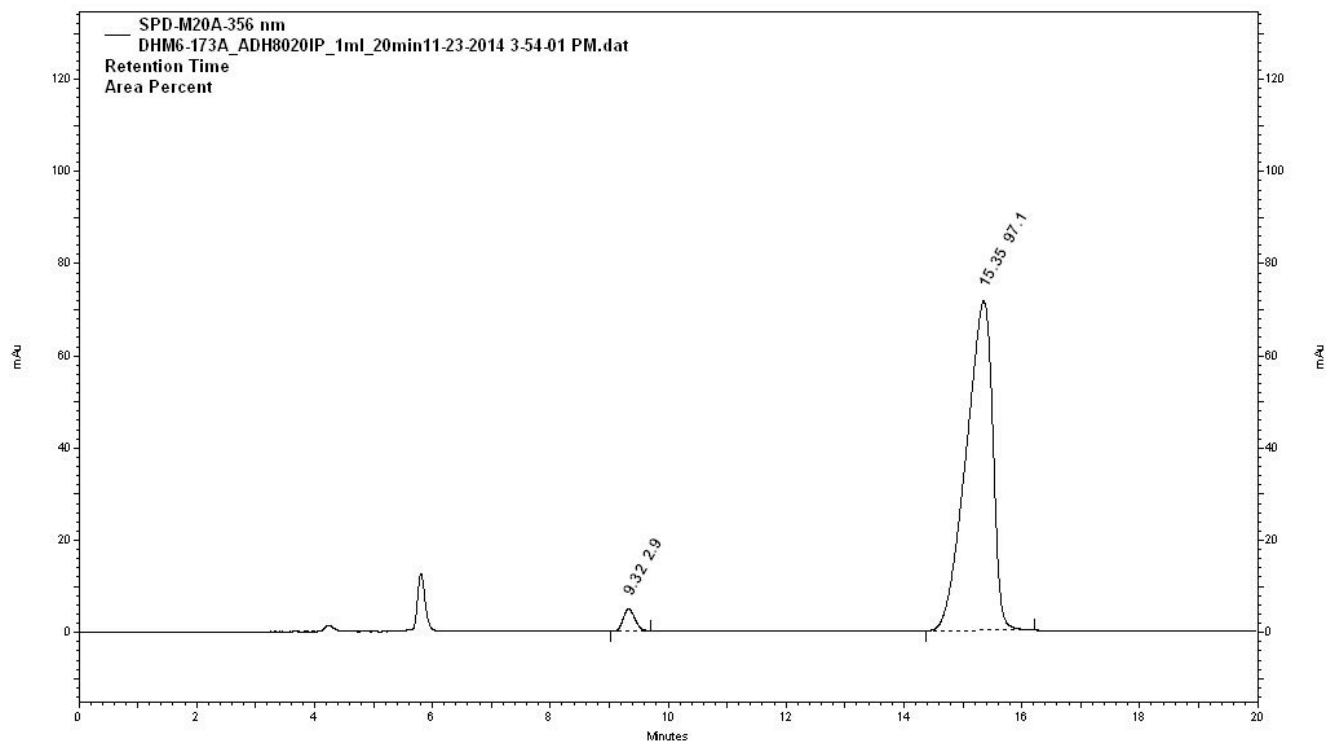

Racemic

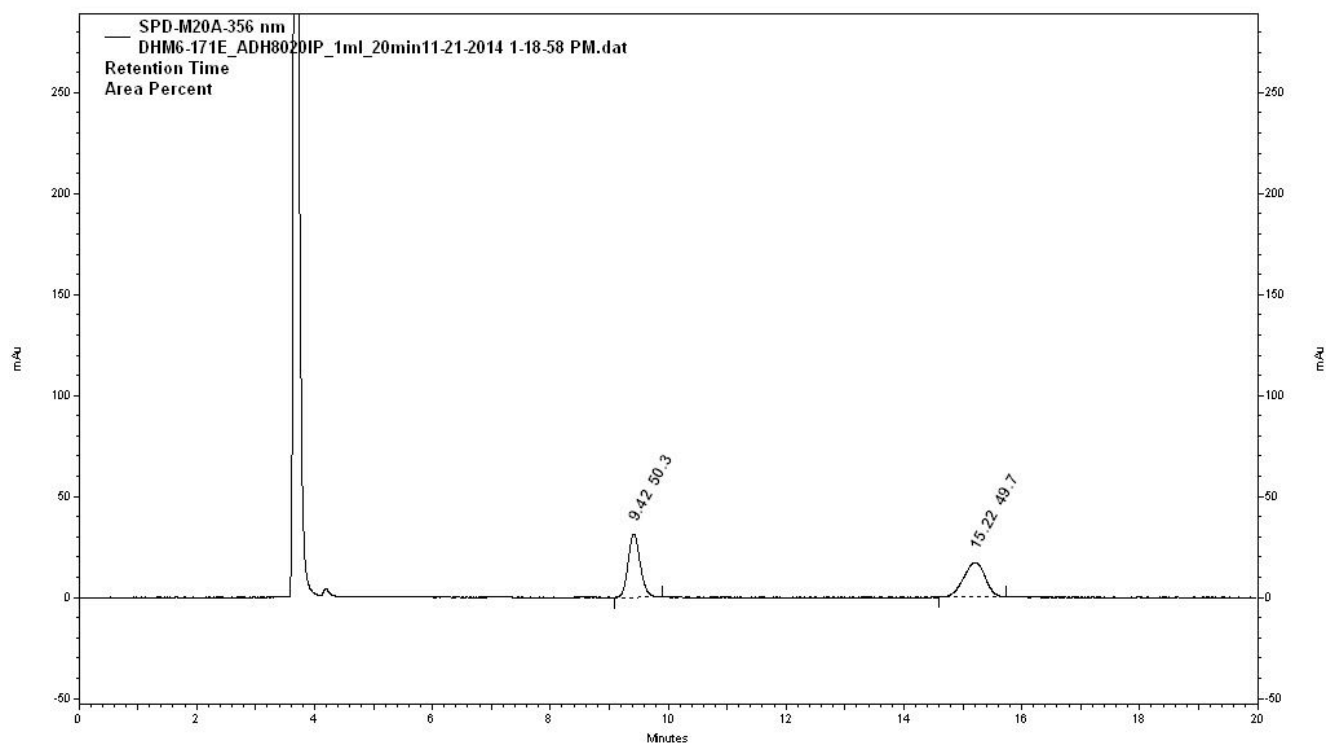

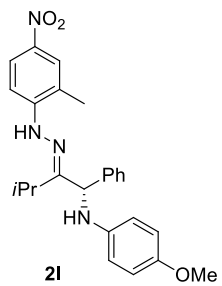

Enantioenriched

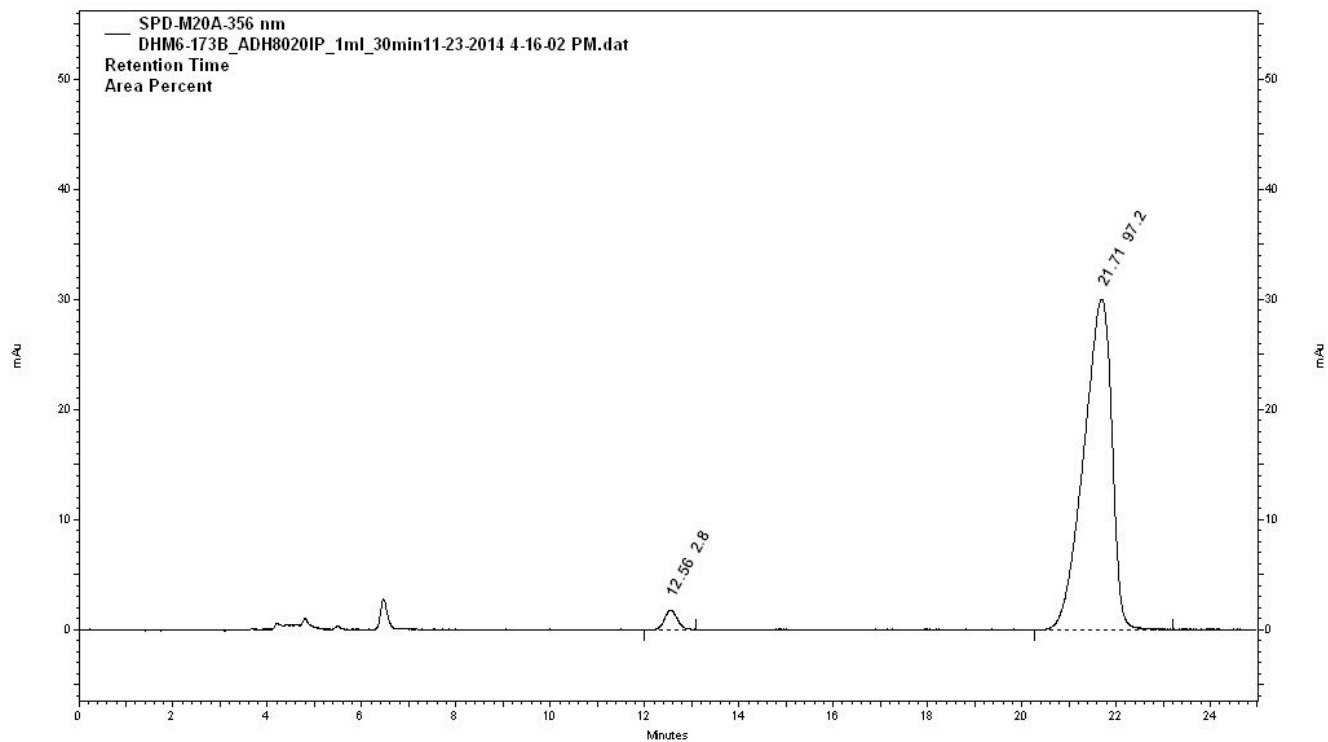

Racemic

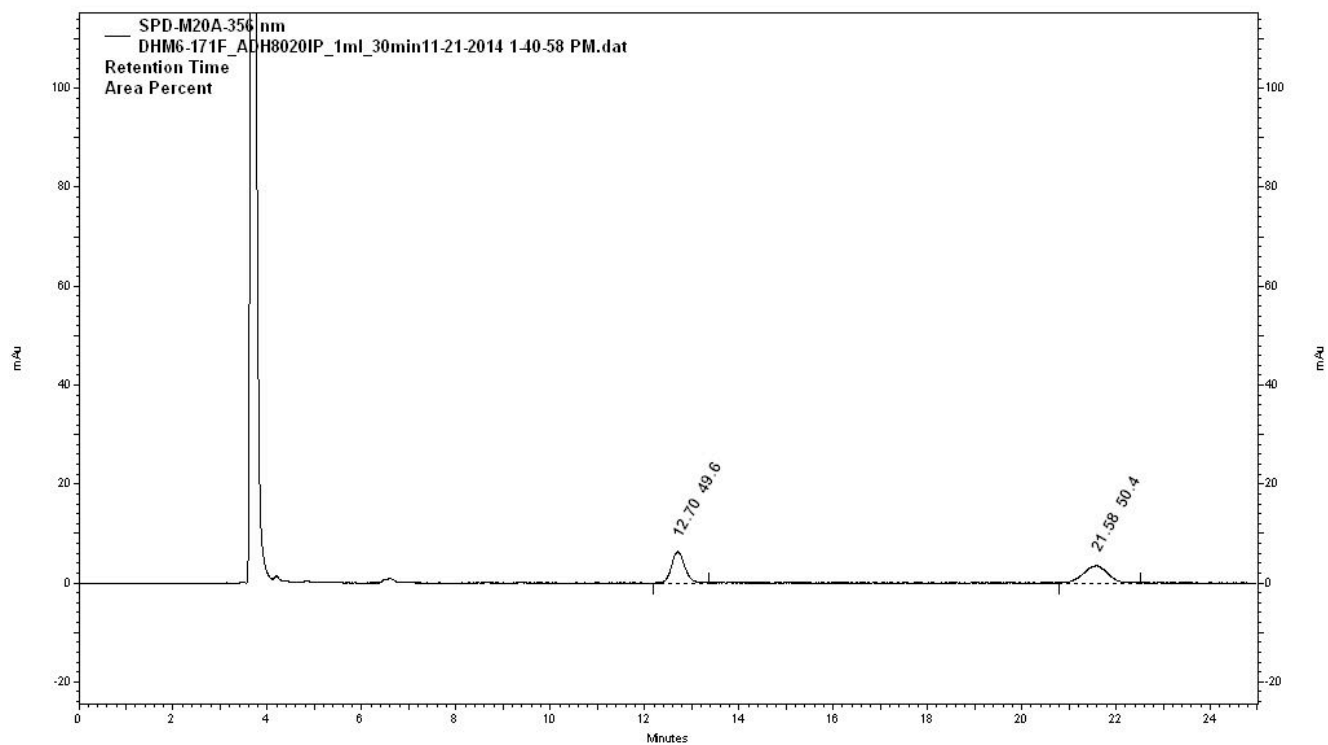

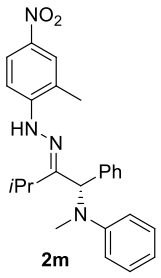

Enantioenriched

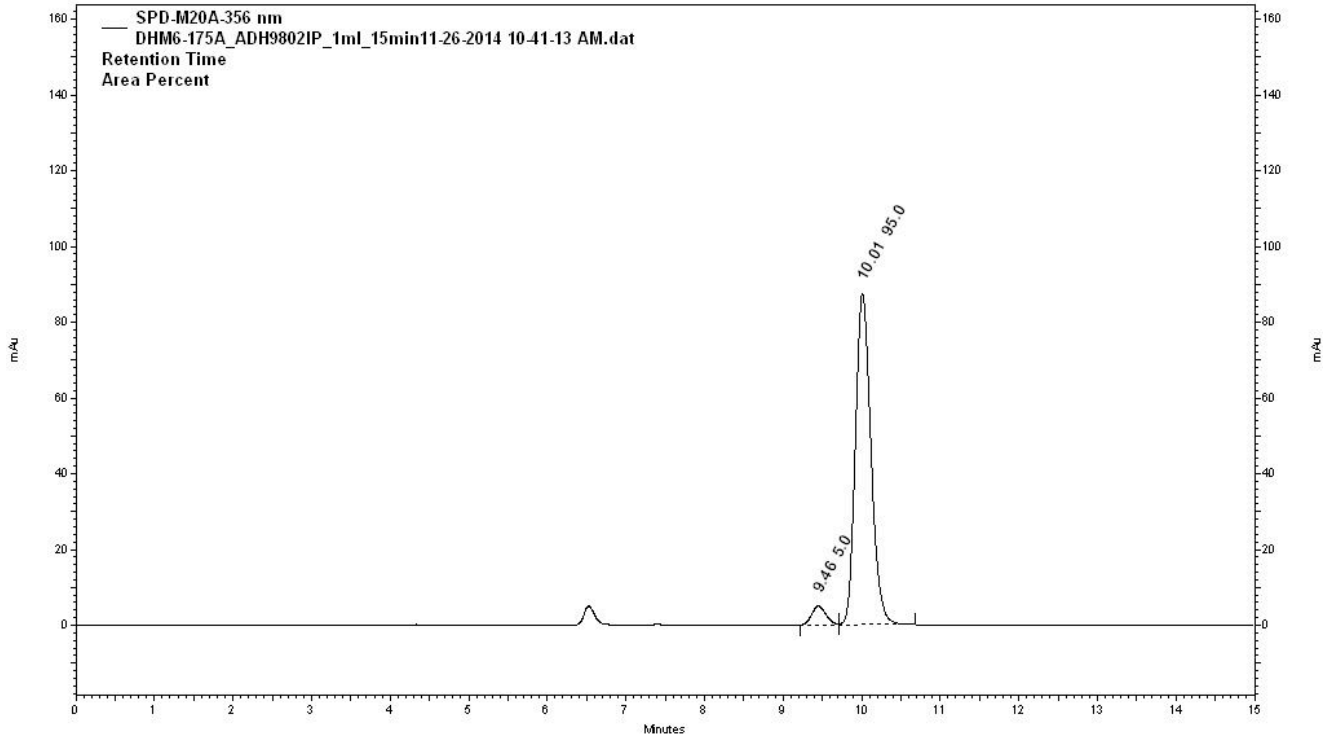

Racemic

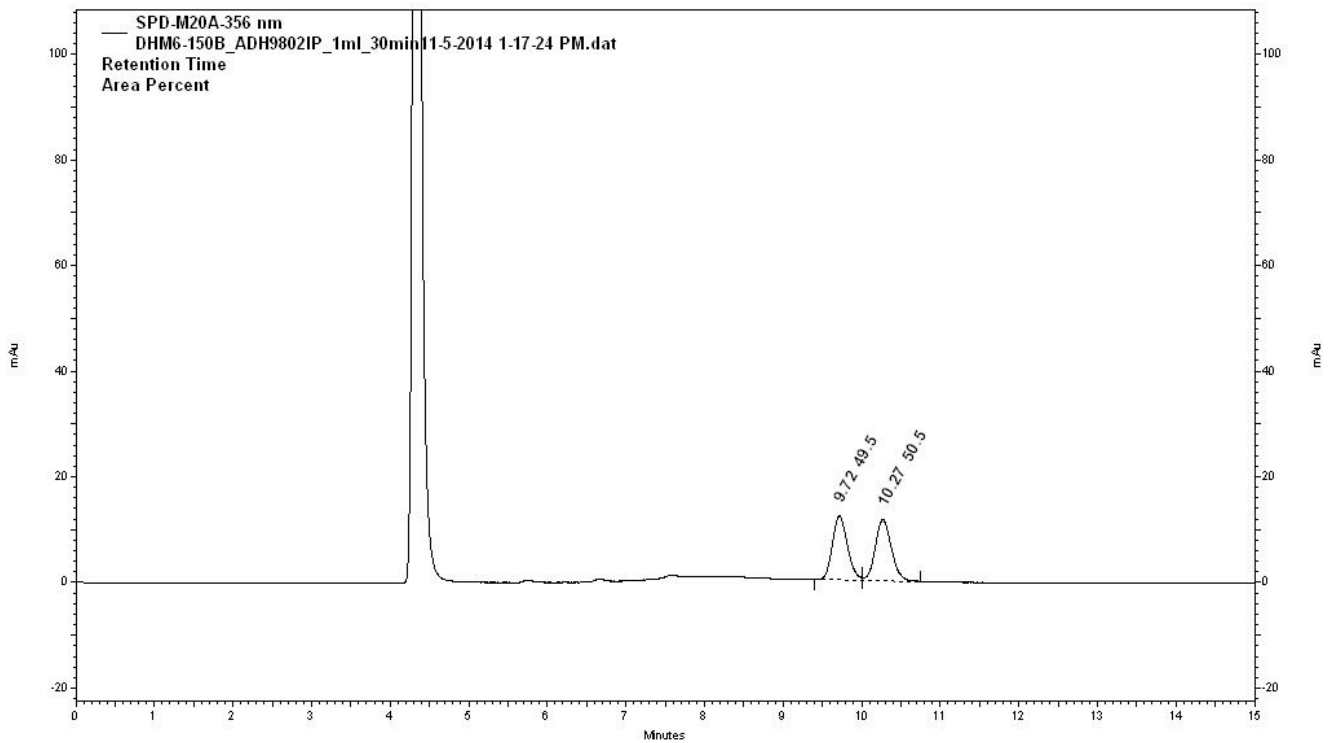

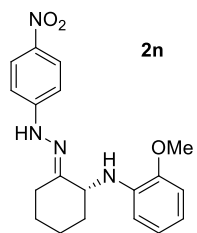

Enantioenriched

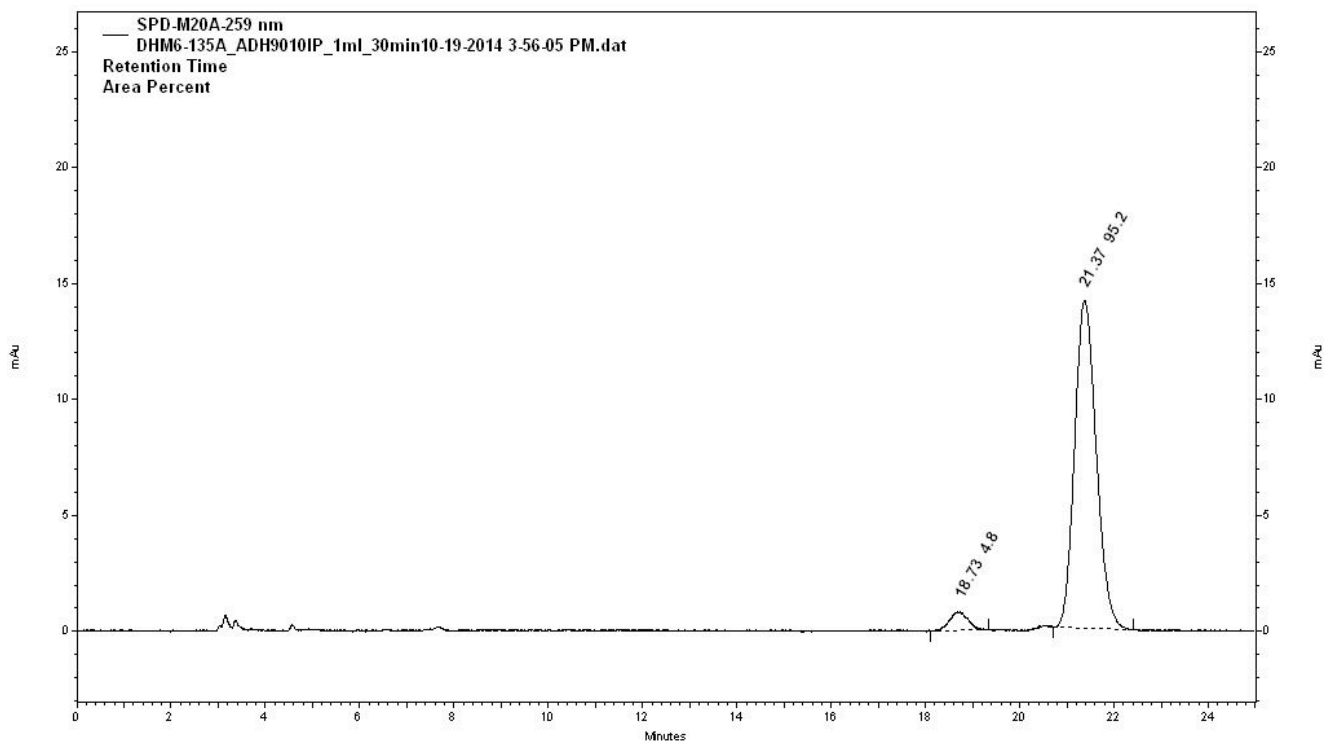

Racemic

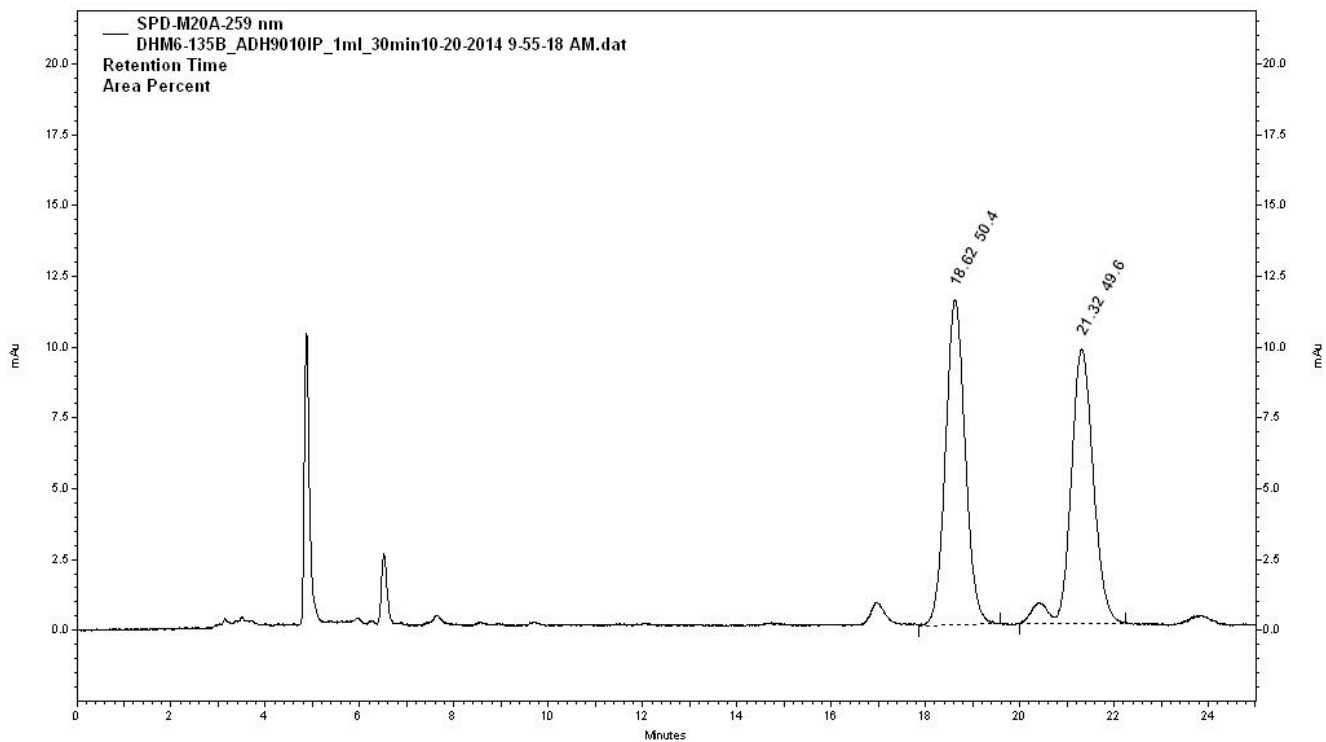

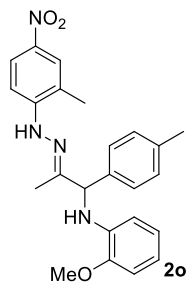

Enantioenriched

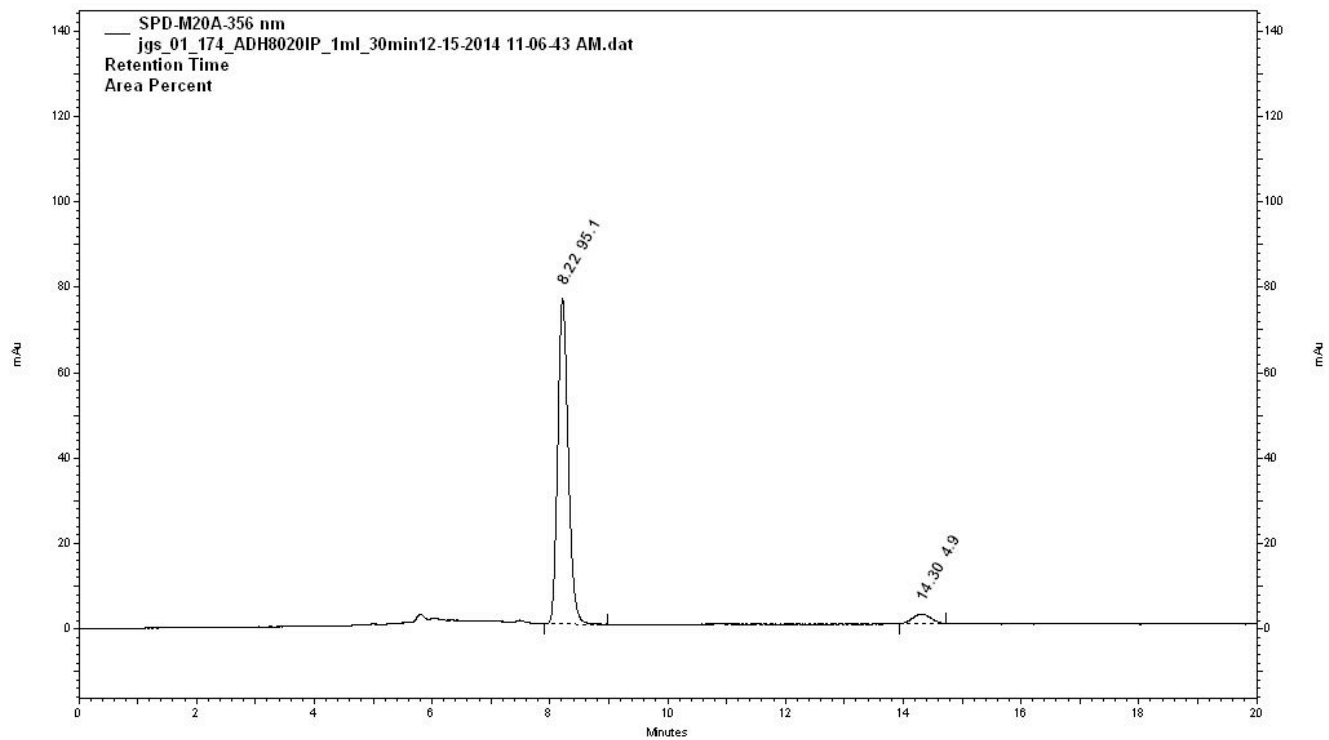

Racemic

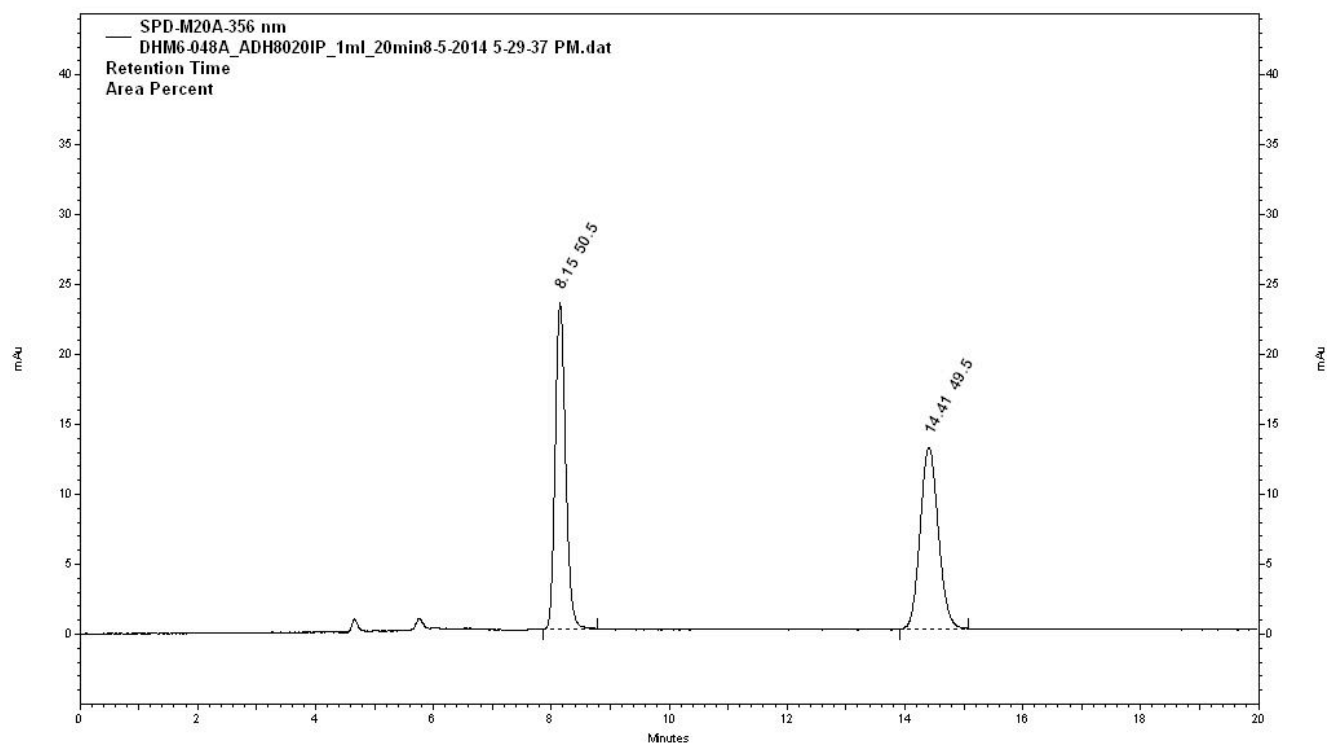

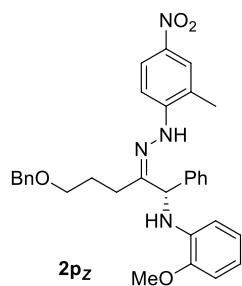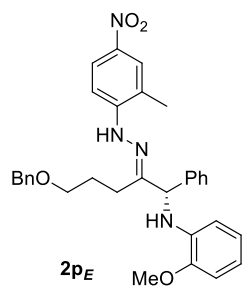

Enantioenriched

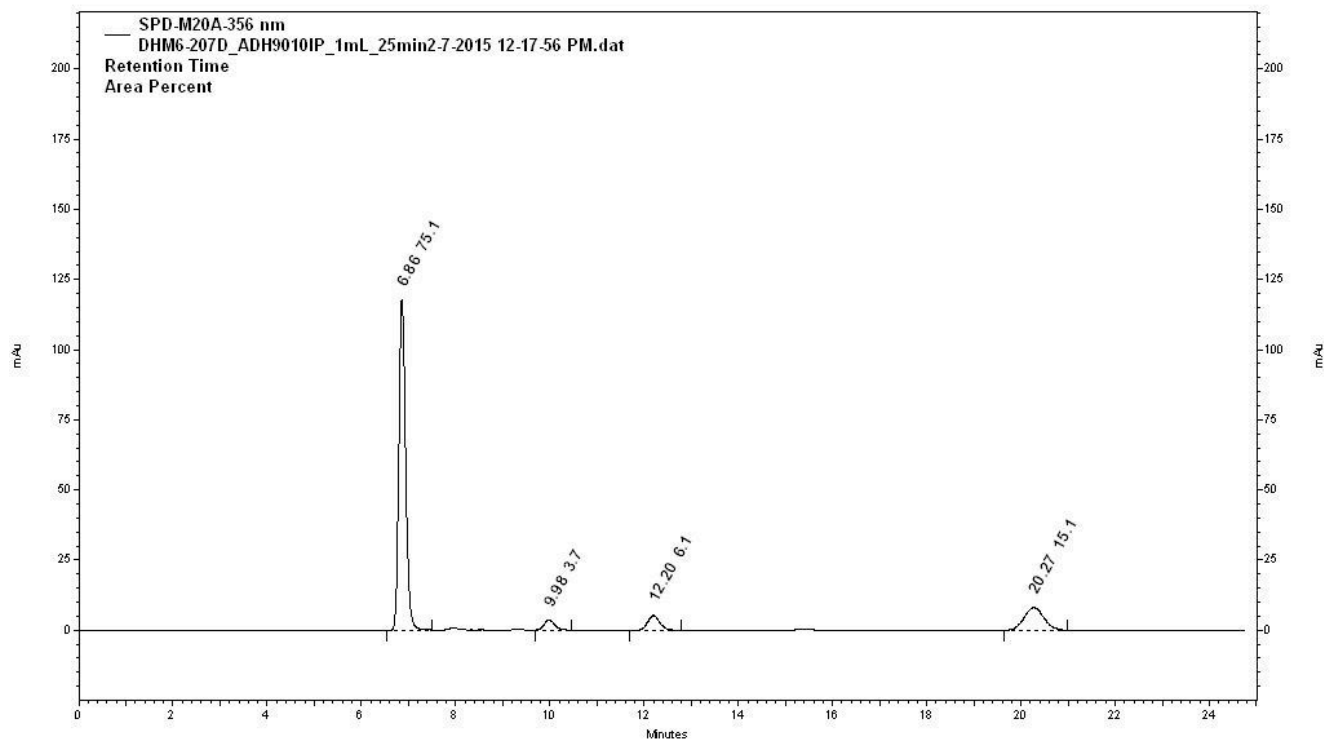

Racemic

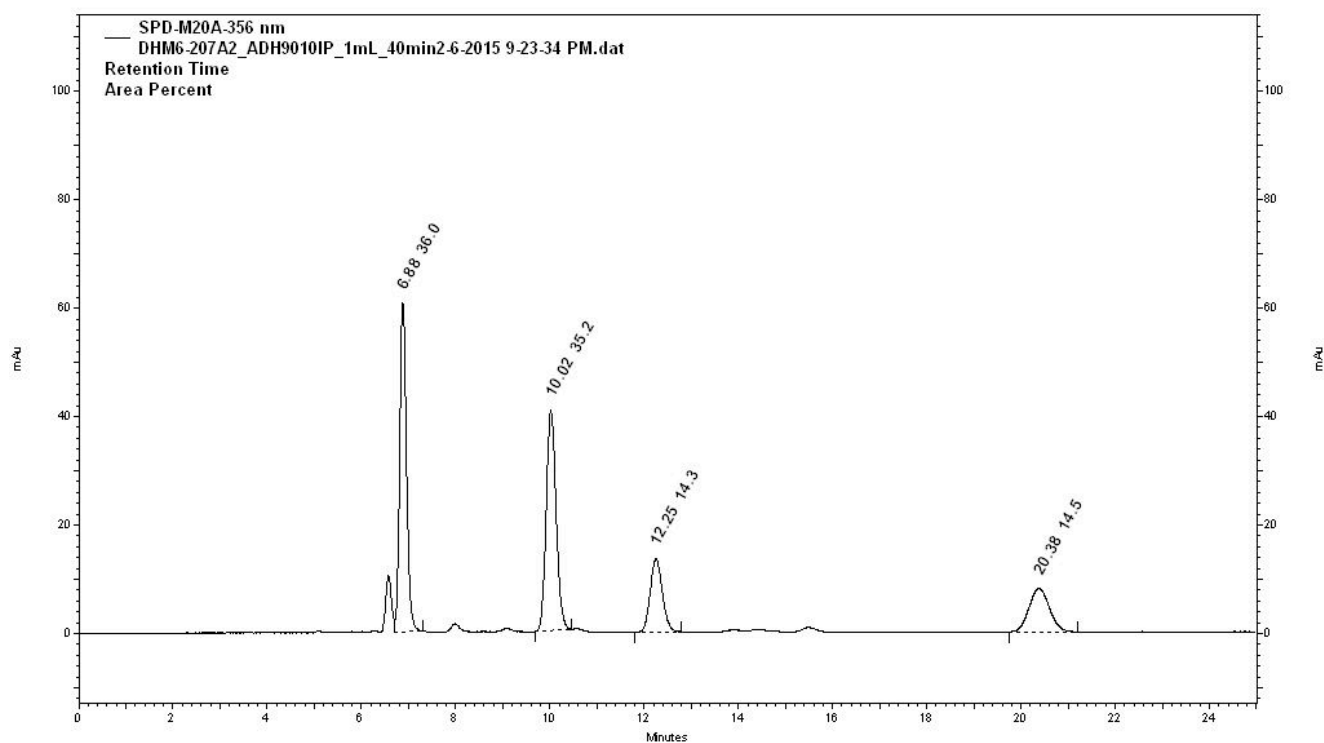

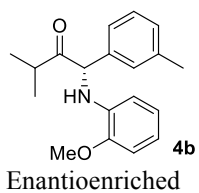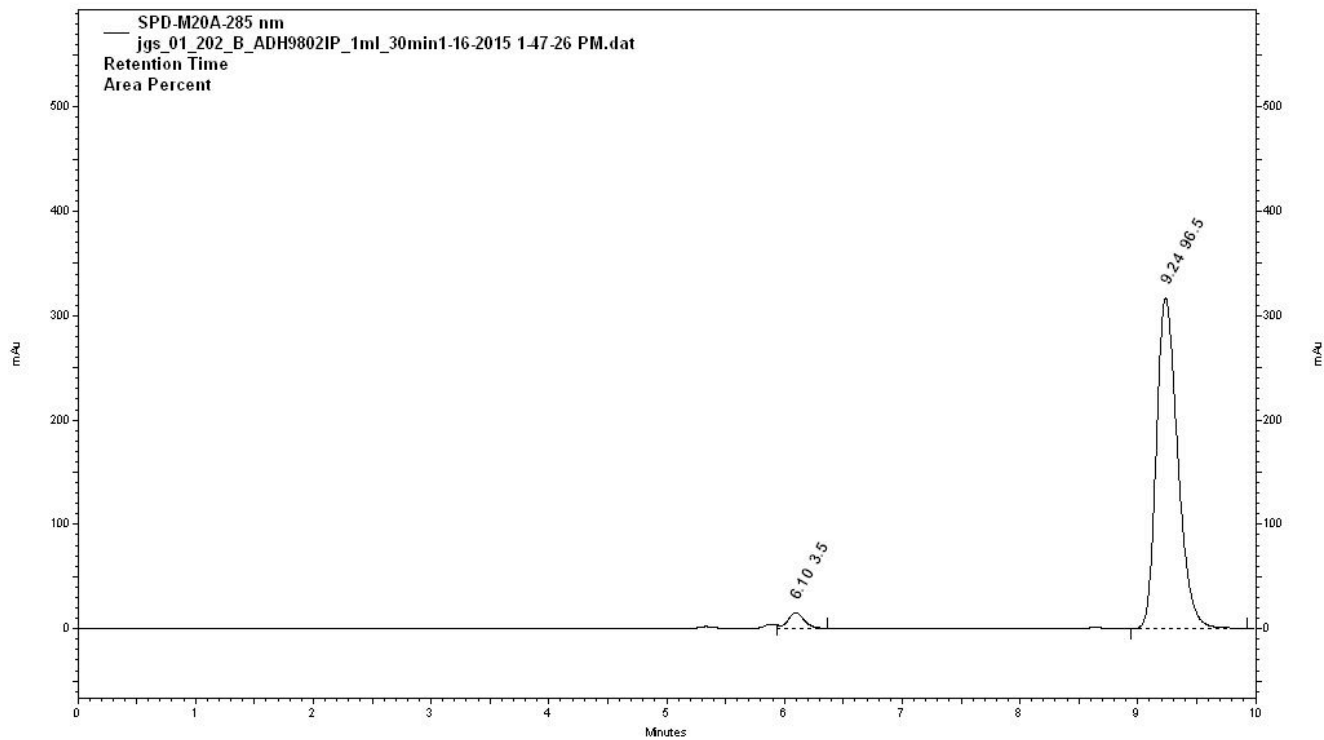

Racemic

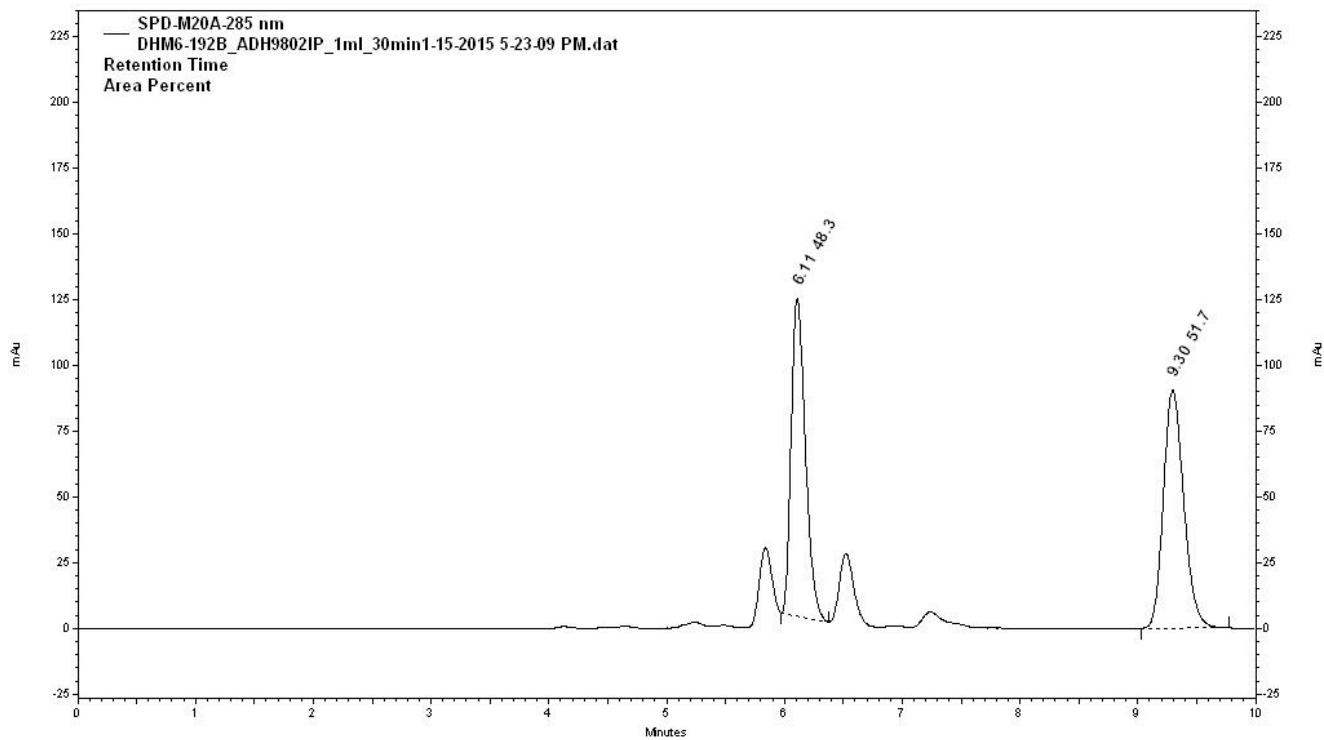



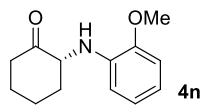

Enantioenriched

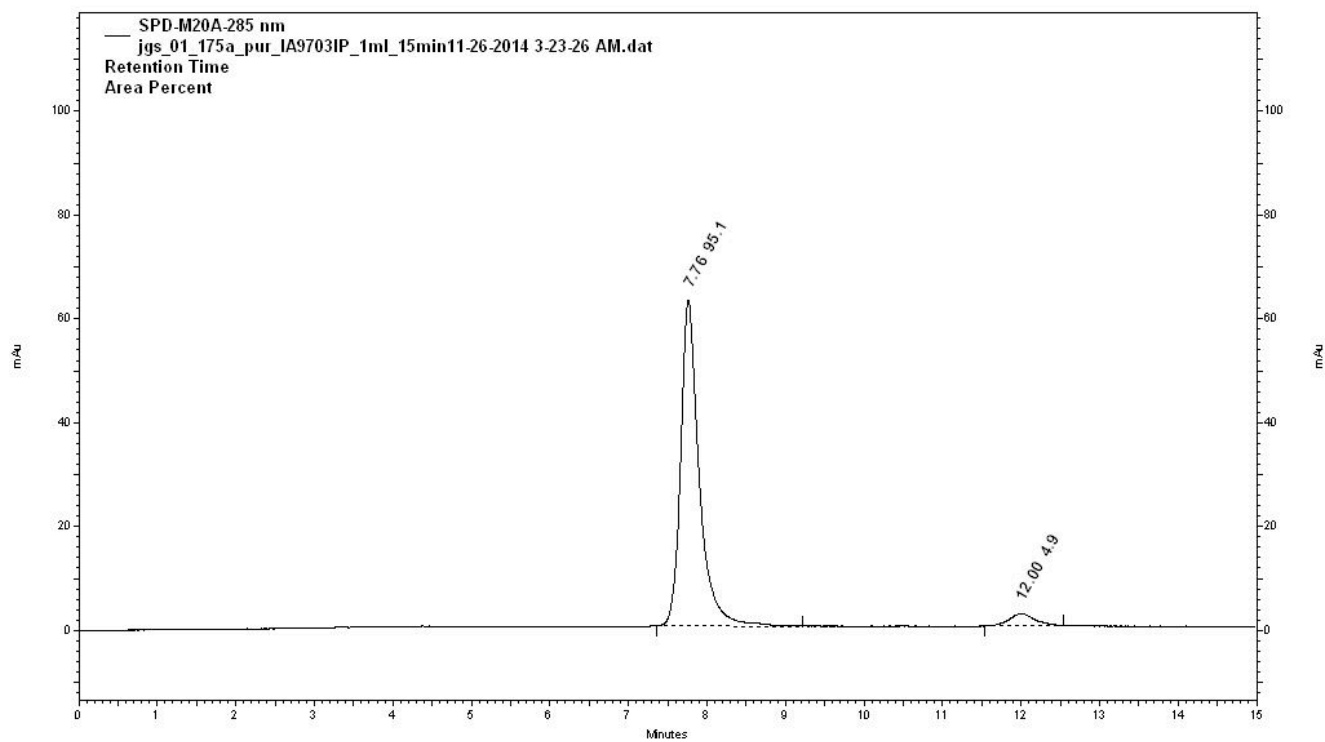

Racemic

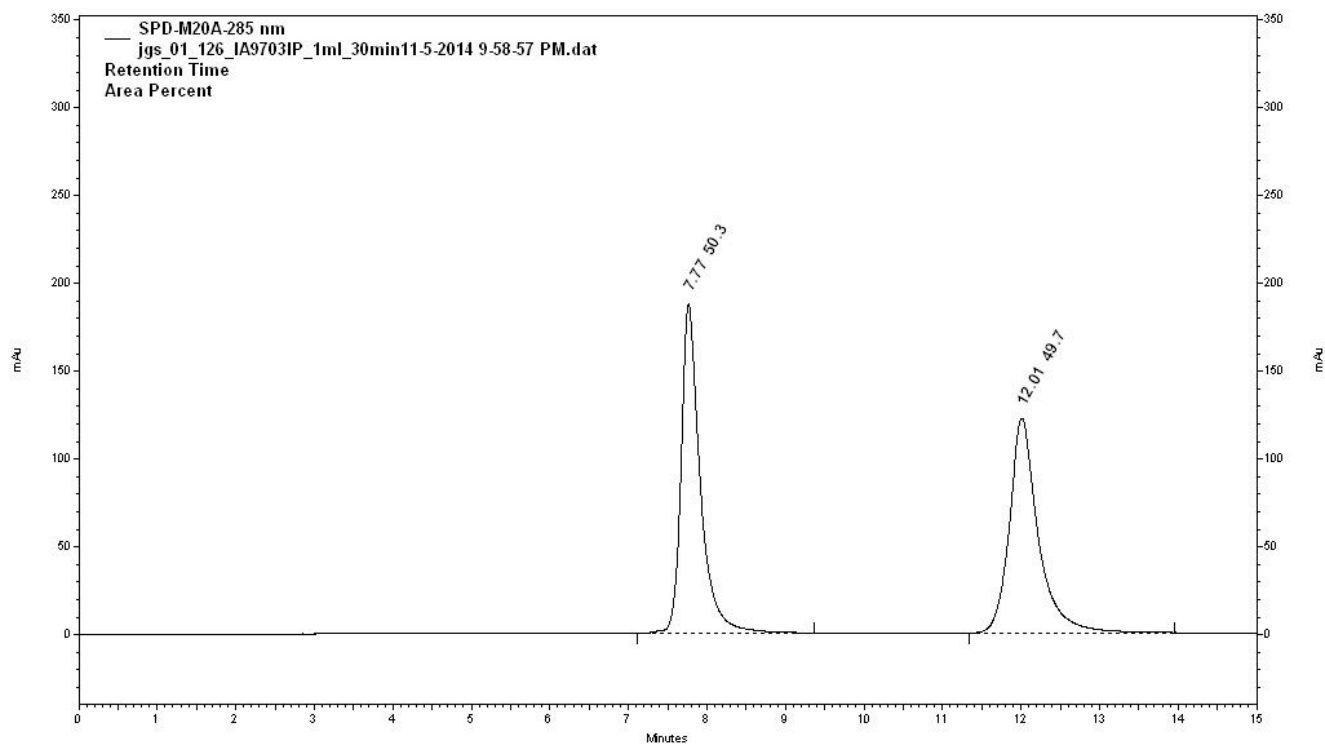

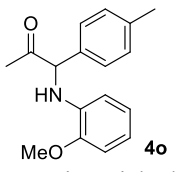

Enantioenriched

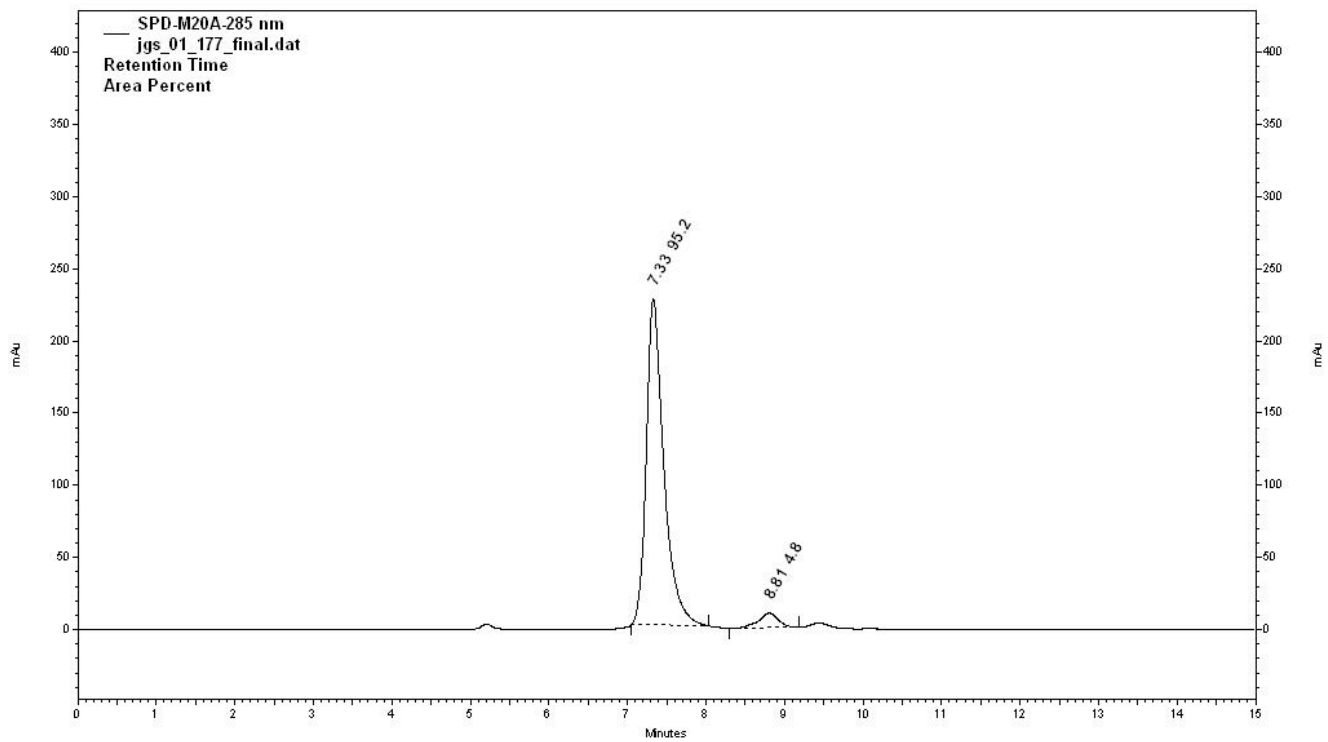

Racemic

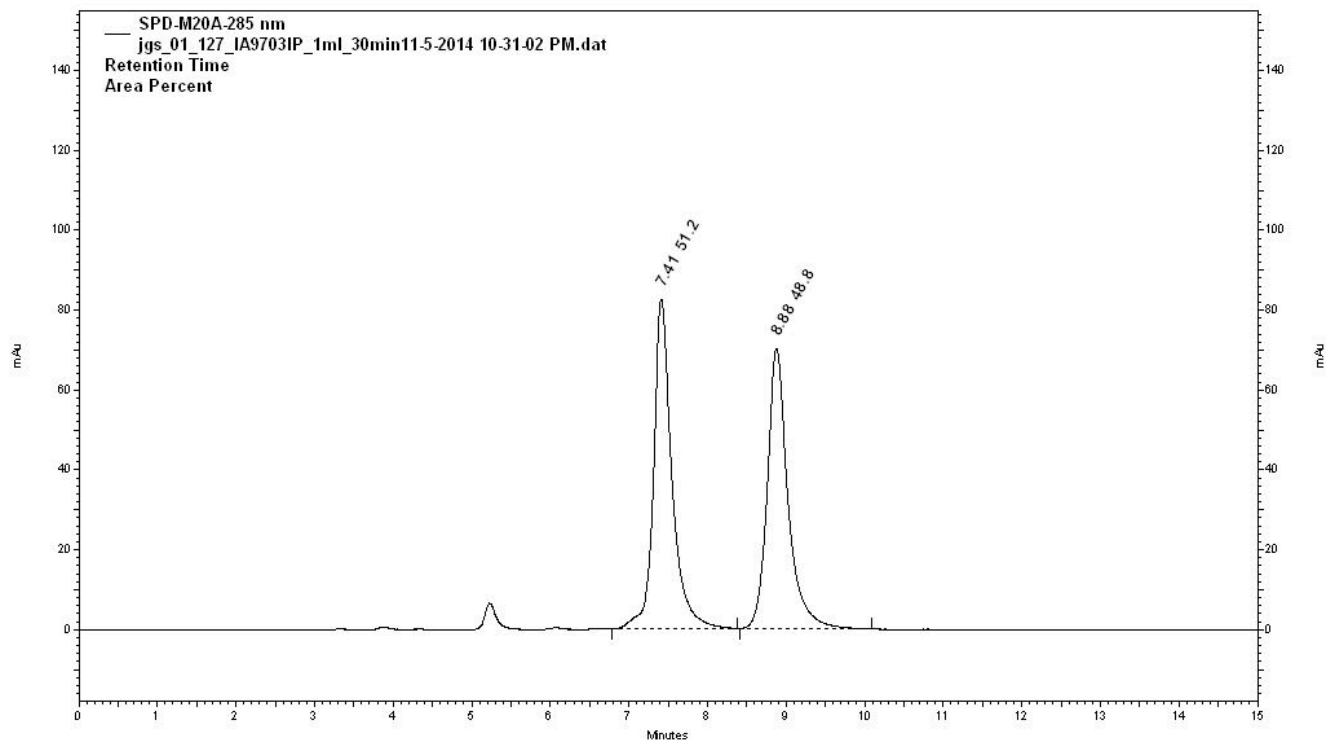

## Crystal Structure of 2g

ORTEP Representation:

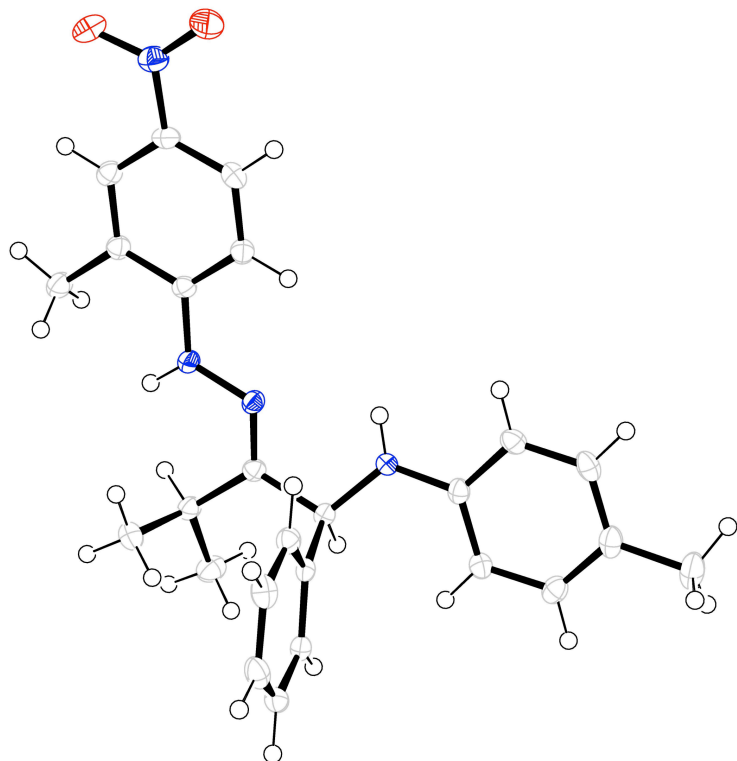

Experimental Details:

A yellow prism 0.080 x 0.060 x 0.040 mm in size was mounted on a Cryoloop with Paratone oil. Data were collected in a nitrogen gas stream at 100(2) K using phi and omega scans. Crystal-to-detector distance was 60 mm and exposure time was 5 seconds per frame using a scan width of 2.0°. Data collection was 99.9% complete to 67.000° in  $q$ . A total of 68854 reflections were collected covering the indices,  $-9 \leq h \leq 9$ ,  $-11 \leq k \leq 11$ ,  $-33 \leq l \leq 33$ . 4089 reflections were found to be symmetry independent, with an  $R_{int}$  of 0.0264. Indexing and unit cell refinement indicated a primitive, orthorhombic lattice. The space group was found to be P 21 21 21 (No. 19). The data were integrated using the Bruker SAINT software program and scaled using the SADABS software program. Solution by iterative methods (SHELXT) produced a complete heavy-atom phasing model consistent with the proposed structure. All non-hydrogen atoms were refined anisotropically by full-matrix least-squares (SHELXL-2014/7). All hydrogen atoms were placed using a riding model. Their positions were constrained relative to their parent atom using the appropriate HFIX command in SHELXL-2014/7. Absolute stereochemistry was unambiguously determined to be S at C12.

Table S1. Crystal data and structure refinement

|                                 |                                                               |                       |
|---------------------------------|---------------------------------------------------------------|-----------------------|
| Empirical formula               | C <sub>25</sub> H <sub>28</sub> N <sub>4</sub> O <sub>2</sub> |                       |
| Formula weight                  | 416.51                                                        |                       |
| Temperature                     | 100(2) K                                                      |                       |
| Wavelength                      | 1.54178 Å                                                     |                       |
| Crystal system                  | Orthorhombic                                                  |                       |
| Space group                     | P 21 21 21                                                    |                       |
| Unit cell dimensions            | $a = 8.2090(11)$ Å                                            | $\alpha = 90^\circ$ . |
|                                 | $b = 9.9163(13)$ Å                                            | $\beta = 90^\circ$ .  |
|                                 | $c = 27.474(4)$ Å                                             | $\gamma = 90^\circ$ . |
| Volume                          | $2236.5(5)$ Å <sup>3</sup>                                    |                       |
| Z                               | 4                                                             |                       |
| Density (calculated)            | 1.237 Mg/m <sup>3</sup>                                       |                       |
| Absorption coefficient          | 0.638 mm <sup>-1</sup>                                        |                       |
| F(000)                          | 888                                                           |                       |
| Crystal size                    | 0.080 x 0.060 x 0.040 mm <sup>3</sup>                         |                       |
| Theta range for data collection | 3.217 to 68.357°.                                             |                       |

|                                 |                                    |
|---------------------------------|------------------------------------|
| Index ranges                    | -9<=h<=9, -11<=k<=11, -33<=l<=33   |
| Reflections collected           | 68854                              |
| Independent reflections         | 4089 [R(int) = 0.0264]             |
| Completeness to theta = 67.000° | 99.9 %                             |
| Absorption correction           | Semi-empirical from equivalents    |
| Max. and min. transmission      | 0.929 and 0.844                    |
| Refinement method               | Full-matrix least-squares on F2    |
| Data / restraints / parameters  | 4089 / 0 / 284                     |
| Goodness-of-fit on F2           | 1.068                              |
| Final R indices [I>2sigma(I)]   | R1 = 0.0284, wR2 = 0.0747          |
| R indices (all data)            | R1 = 0.0286, wR2 = 0.0749          |
| Absolute structure parameter    | 0.07(3)                            |
| Extinction coefficient          | n/a                                |
| Largest diff. peak and hole     | 0.245 and -0.281 e.Å <sup>-3</sup> |

Table S2. Atomic coordinates ( $\times 10^4$ ) and equivalent isotropic displacement parameters ( $\text{\AA}^2 \times 10^3$ ).  $U(\text{eq})$  is defined as one third of the trace of the orthogonalized  $U^{ij}$  tensor

|       | x        | y        | z       | $U(\text{eq})$ |
|-------|----------|----------|---------|----------------|
| C(1)  | 5797(2)  | 2329(2)  | 1948(1) | 18(1)          |
| C(2)  | 7273(2)  | 2847(2)  | 2122(1) | 20(1)          |
| C(3)  | 8231(2)  | 2080(2)  | 2428(1) | 22(1)          |
| C(4)  | 7703(2)  | 800(2)   | 2557(1) | 20(1)          |
| C(5)  | 6226(2)  | 282(2)   | 2396(1) | 21(1)          |
| C(6)  | 5243(2)  | 1041(2)  | 2095(1) | 20(1)          |
| C(7)  | 3643(2)  | 497(2)   | 1912(1) | 26(1)          |
| C(8)  | 4370(2)  | 4921(2)  | 1173(1) | 18(1)          |
| C(9)  | 2867(2)  | 4305(2)  | 939(1)  | 21(1)          |
| C(10) | 3358(2)  | 3361(2)  | 518(1)  | 27(1)          |
| C(11) | 1586(2)  | 5319(2)  | 775(1)  | 28(1)          |
| C(12) | 4971(2)  | 6296(2)  | 1006(1) | 18(1)          |
| C(13) | 5690(2)  | 6112(2)  | 493(1)  | 18(1)          |
| C(14) | 7094(2)  | 5340(2)  | 434(1)  | 21(1)          |
| C(15) | 7695(2)  | 5078(2)  | -29(1)  | 26(1)          |
| C(16) | 6900(2)  | 5586(2)  | -435(1) | 26(1)          |
| C(17) | 5522(2)  | 6376(2)  | -379(1) | 24(1)          |
| C(18) | 4927(2)  | 6647(2)  | 85(1)   | 20(1)          |
| C(19) | 6893(2)  | 8073(2)  | 1280(1) | 18(1)          |
| C(20) | 8269(2)  | 8404(2)  | 1554(1) | 21(1)          |
| C(21) | 9027(2)  | 9640(2)  | 1498(1) | 23(1)          |
| C(22) | 8460(2)  | 10601(2) | 1169(1) | 24(1)          |
| C(23) | 7093(2)  | 10263(2) | 898(1)  | 23(1)          |
| C(24) | 6314(2)  | 9029(2)  | 947(1)  | 20(1)          |
| C(25) | 9321(3)  | 11921(2) | 1094(1) | 32(1)          |
| N(1)  | 8773(2)  | -50(2)   | 2842(1) | 25(1)          |
| N(2)  | 4865(2)  | 3025(2)  | 1616(1) | 20(1)          |
| N(3)  | 5291(2)  | 4314(1)  | 1481(1) | 18(1)          |
| N(4)  | 6118(2)  | 6844(2)  | 1355(1) | 21(1)          |
| O(1)  | 10050(2) | 428(2)   | 3004(1) | 40(1)          |
| O(2)  | 8377(2)  | -1240(1) | 2910(1) | 29(1)          |

Table S3. Bond lengths [Å] and angles [°]

|              |          |                     |            |
|--------------|----------|---------------------|------------|
| C(1)-N(2)    | 1.377(2) | N(2)-H(2A)          | 0.8800     |
| C(1)-C(2)    | 1.400(3) | N(4)-H(4)           | 0.88       |
| C(1)-C(6)    | 1.414(2) | N(2)-C(1)-C(2)      | 121.51(16) |
| C(2)-C(3)    | 1.380(3) | N(2)-C(1)-C(6)      | 117.60(16) |
| C(2)-H(2)    | 0.9500   | C(2)-C(1)-C(6)      | 120.84(16) |
| C(3)-C(4)    | 1.388(3) | C(3)-C(2)-C(1)      | 119.90(16) |
| C(3)-H(3)    | 0.9500   | C(3)-C(2)-H(2)      | 120.0      |
| C(4)-C(5)    | 1.388(3) | C(1)-C(2)-H(2)      | 120.0      |
| C(4)-N(1)    | 1.448(2) | C(2)-C(3)-C(4)      | 118.81(17) |
| C(5)-C(6)    | 1.380(2) | C(2)-C(3)-H(3)      | 120.6      |
| C(5)-H(5)    | 0.9500   | C(4)-C(3)-H(3)      | 120.6      |
| C(6)-C(7)    | 1.506(3) | C(3)-C(4)-C(5)      | 122.00(16) |
| C(7)-H(7A)   | 0.9800   | C(3)-C(4)-N(1)      | 118.76(17) |
| C(7)-H(7B)   | 0.9800   | C(5)-C(4)-N(1)      | 119.12(16) |
| C(7)-H(7C)   | 0.9800   | C(6)-C(5)-C(4)      | 120.00(17) |
| C(8)-N(3)    | 1.285(2) | C(6)-C(5)-H(5)      | 120.0      |
| C(8)-C(9)    | 1.520(2) | C(4)-C(5)-H(5)      | 120.0      |
| C(8)-C(12)   | 1.521(2) | C(5)-C(6)-C(1)      | 118.38(16) |
| C(9)-C(11)   | 1.522(3) | C(5)-C(6)-C(7)      | 120.99(16) |
| C(9)-C(10)   | 1.541(3) | C(1)-C(6)-C(7)      | 120.61(16) |
| C(9)-H(9)    | 1.0000   | C(6)-C(7)-H(7A)     | 109.5      |
| C(10)-H(10A) | 0.9800   | C(6)-C(7)-H(7B)     | 109.5      |
| C(10)-H(10B) | 0.9800   | H(7A)-C(7)-H(7B)    | 109.5      |
| C(10)-H(10C) | 0.9800   | C(6)-C(7)-H(7C)     | 109.5      |
| C(11)-H(11A) | 0.9800   | H(7A)-C(7)-H(7C)    | 109.5      |
| C(11)-H(11B) | 0.9800   | H(7B)-C(7)-H(7C)    | 109.5      |
| C(11)-H(11C) | 0.9800   | N(3)-C(8)-C(9)      | 124.64(15) |
| C(12)-N(4)   | 1.450(2) | N(3)-C(8)-C(12)     | 115.35(15) |
| C(12)-C(13)  | 1.539(2) | C(9)-C(8)-C(12)     | 119.72(14) |
| C(12)-H(12)  | 1.0000   | C(8)-C(9)-C(11)     | 114.86(15) |
| C(13)-C(18)  | 1.389(2) | C(8)-C(9)-C(10)     | 110.46(14) |
| C(13)-C(14)  | 1.394(3) | C(11)-C(9)-C(10)    | 111.11(15) |
| C(14)-C(15)  | 1.387(3) | C(8)-C(9)-H(9)      | 106.6      |
| C(14)-H(14)  | 0.9500   | C(11)-C(9)-H(9)     | 106.6      |
| C(15)-C(16)  | 1.388(3) | C(10)-C(9)-H(9)     | 106.6      |
| C(15)-H(15)  | 0.9500   | C(9)-C(10)-H(10A)   | 109.5      |
| C(16)-C(17)  | 1.385(3) | C(9)-C(10)-H(10B)   | 109.5      |
| C(16)-H(16)  | 0.9500   | H(10A)-C(10)-H(10B) | 109.5      |
| C(17)-C(18)  | 1.391(2) | C(9)-C(10)-H(10C)   | 109.5      |
| C(17)-H(17)  | 0.9500   | H(10A)-C(10)-H(10C) | 109.5      |
| C(18)-H(18)  | 0.9500   | H(10B)-C(10)-H(10C) | 109.5      |
| C(19)-N(4)   | 1.391(2) | C(9)-C(11)-H(11A)   | 109.5      |
| C(19)-C(20)  | 1.397(2) | C(9)-C(11)-H(11B)   | 109.5      |
| C(19)-C(24)  | 1.401(2) | H(11A)-C(11)-H(11B) | 109.5      |
| C(20)-C(21)  | 1.383(3) | C(9)-C(11)-H(11C)   | 109.5      |
| C(20)-H(20)  | 0.9500   | H(11A)-C(11)-H(11C) | 109.5      |
| C(21)-C(22)  | 1.394(3) | H(11B)-C(11)-H(11C) | 109.5      |
| C(21)-H(21)  | 0.9500   | N(4)-C(12)-C(8)     | 110.30(13) |
| C(22)-C(23)  | 1.388(3) | N(4)-C(12)-C(13)    | 113.64(14) |
| C(22)-C(25)  | 1.502(3) | C(8)-C(12)-C(13)    | 107.13(13) |
| C(23)-C(24)  | 1.387(2) | N(4)-C(12)-H(12)    | 108.6      |
| C(23)-H(23)  | 0.9500   | C(8)-C(12)-H(12)    | 108.6      |
| C(24)-H(24)  | 0.9500   | C(13)-C(12)-H(12)   | 108.6      |
| C(25)-H(25A) | 0.9800   | C(18)-C(13)-C(14)   | 119.25(16) |
| C(25)-H(25B) | 0.9800   | C(18)-C(13)-C(12)   | 121.37(15) |
| C(25)-H(25C) | 0.9800   | C(14)-C(13)-C(12)   | 119.30(15) |
| N(1)-O(1)    | 1.233(2) | C(15)-C(14)-C(13)   | 120.26(16) |
| N(1)-O(2)    | 1.238(2) | C(15)-C(14)-H(14)   | 119.9      |
| N(2)-N(3)    | 1.376(2) | C(13)-C(14)-H(14)   | 119.9      |
|              |          | C(14)-C(15)-C(16)   | 120.10(17) |
|              |          | C(14)-C(15)-H(15)   | 120.0      |

|                   |            |                     |            |
|-------------------|------------|---------------------|------------|
| C(16)-C(15)-H(15) | 120.0      | C(24)-C(23)-C(22)   | 122.28(17) |
| C(17)-C(16)-C(15) | 119.98(16) | C(24)-C(23)-H(23)   | 118.9      |
| C(17)-C(16)-H(16) | 120.0      | C(22)-C(23)-H(23)   | 118.9      |
| C(15)-C(16)-H(16) | 120.0      | C(23)-C(24)-C(19)   | 120.24(16) |
| C(16)-C(17)-C(18) | 119.91(17) | C(23)-C(24)-H(24)   | 119.9      |
| C(16)-C(17)-H(17) | 120.0      | C(19)-C(24)-H(24)   | 119.9      |
| C(18)-C(17)-H(17) | 120.0      | C(22)-C(25)-H(25A)  | 109.5      |
| C(13)-C(18)-C(17) | 120.46(17) | C(22)-C(25)-H(25B)  | 109.5      |
| C(13)-C(18)-H(18) | 119.8      | H(25A)-C(25)-H(25B) | 109.5      |
| C(17)-C(18)-H(18) | 119.8      | C(22)-C(25)-H(25C)  | 109.5      |
| N(4)-C(19)-C(20)  | 119.67(16) | H(25A)-C(25)-H(25C) | 109.5      |
| N(4)-C(19)-C(24)  | 122.39(16) | H(25B)-C(25)-H(25C) | 109.5      |
| C(20)-C(19)-C(24) | 117.91(16) | O(1)-N(1)-O(2)      | 122.34(16) |
| C(21)-C(20)-C(19) | 120.81(17) | O(1)-N(1)-C(4)      | 119.18(16) |
| C(21)-C(20)-H(20) | 119.6      | O(2)-N(1)-C(4)      | 118.48(16) |
| C(19)-C(20)-H(20) | 119.6      | N(3)-N(2)-C(1)      | 120.16(15) |
| C(20)-C(21)-C(22) | 121.81(16) | N(3)-N(2)-H(2A)     | 119.9      |
| C(20)-C(21)-H(21) | 119.1      | C(1)-N(2)-H(2A)     | 119.9      |
| C(22)-C(21)-H(21) | 119.1      | C(8)-N(3)-N(2)      | 117.54(15) |
| C(23)-C(22)-C(21) | 116.96(17) | C(19)-N(4)-C(12)    | 121.80(14) |
| C(23)-C(22)-C(25) | 121.17(18) | C(19)-N(4)-H(4)     | 119.1      |
| C(21)-C(22)-C(25) | 121.83(17) | C(12)-N(4)-H(4)     | 119.1      |

Symmetry transformations used to generate equivalent atoms:

-none-

Table S4. Anisotropic displacement parameters ( $\text{\AA}^2 \times 10^3$ ). The anisotropic displacement factor exponent takes the form:  
 $-2\pi^2 [ h^2 a^{*2} U^{11} + \dots + 2 h k a^* b^* U^{12} ]$

|       | U11   | U22   | U33   | U23   | U13    | U12    |
|-------|-------|-------|-------|-------|--------|--------|
| C(1)  | 22(1) | 19(1) | 13(1) | 0(1)  | 2(1)   | 2(1)   |
| C(2)  | 22(1) | 19(1) | 19(1) | 0(1)  | 0(1)   | -1(1)  |
| C(3)  | 22(1) | 24(1) | 20(1) | -4(1) | -2(1)  | -1(1)  |
| C(4)  | 23(1) | 23(1) | 16(1) | 1(1)  | 0(1)   | 7(1)   |
| C(5)  | 26(1) | 20(1) | 17(1) | 2(1)  | 4(1)   | 0(1)   |
| C(6)  | 22(1) | 19(1) | 18(1) | 1(1)  | 2(1)   | -1(1)  |
| C(7)  | 25(1) | 22(1) | 30(1) | 6(1)  | -4(1)  | -4(1)  |
| C(8)  | 19(1) | 18(1) | 15(1) | 1(1)  | 2(1)   | 0(1)   |
| C(9)  | 21(1) | 20(1) | 23(1) | 4(1)  | -1(1)  | -4(1)  |
| C(10) | 30(1) | 26(1) | 26(1) | -2(1) | -5(1)  | -6(1)  |
| C(11) | 20(1) | 30(1) | 35(1) | 9(1)  | -4(1)  | 0(1)   |
| C(12) | 19(1) | 15(1) | 19(1) | 1(1)  | -1(1)  | -1(1)  |
| C(13) | 20(1) | 14(1) | 19(1) | 0(1)  | -1(1)  | -5(1)  |
| C(14) | 19(1) | 20(1) | 24(1) | 0(1)  | -2(1)  | -2(1)  |
| C(15) | 21(1) | 25(1) | 31(1) | -6(1) | 4(1)   | -2(1)  |
| C(16) | 29(1) | 28(1) | 21(1) | -7(1) | 5(1)   | -9(1)  |
| C(17) | 29(1) | 23(1) | 19(1) | 2(1)  | -3(1)  | -8(1)  |
| C(18) | 23(1) | 15(1) | 22(1) | 0(1)  | -3(1)  | -3(1)  |
| C(19) | 21(1) | 17(1) | 17(1) | -3(1) | 4(1)   | -1(1)  |
| C(20) | 23(1) | 25(1) | 16(1) | -2(1) | 0(1)   | 0(1)   |
| C(21) | 22(1) | 27(1) | 20(1) | -9(1) | 2(1)   | -4(1)  |
| C(22) | 26(1) | 21(1) | 24(1) | -6(1) | 8(1)   | -5(1)  |
| C(23) | 26(1) | 18(1) | 24(1) | 0(1)  | 4(1)   | 2(1)   |
| C(24) | 20(1) | 19(1) | 21(1) | -2(1) | -1(1)  | 0(1)   |
| C(25) | 37(1) | 24(1) | 36(1) | -4(1) | 8(1)   | -11(1) |
| N(1)  | 26(1) | 26(1) | 23(1) | 1(1)  | -1(1)  | 6(1)   |
| N(2)  | 21(1) | 17(1) | 22(1) | 3(1)  | -4(1)  | -4(1)  |
| N(3)  | 20(1) | 16(1) | 18(1) | 1(1)  | 1(1)   | -1(1)  |
| N(4)  | 26(1) | 18(1) | 18(1) | 2(1)  | -6(1)  | -5(1)  |
| O(1)  | 34(1) | 35(1) | 50(1) | 2(1)  | -21(1) | 5(1)   |
| O(2)  | 32(1) | 25(1) | 32(1) | 10(1) | 2(1)   | 5(1)   |

Table 5. Hydrogen coordinates ( $\times 10^4$ ) and isotropic displacement parameters ( $\text{\AA}^2 \times 10^3$ )

|        | x     | y     | z    | U(eq) |
|--------|-------|-------|------|-------|
| H(2)   | 7614  | 3726  | 2029 | 24    |
| H(3)   | 9234  | 2422  | 2548 | 26    |
| H(5)   | 5893  | -594  | 2494 | 25    |
| H(7A)  | 3472  | -413  | 2042 | 39    |
| H(7B)  | 3659  | 462   | 1556 | 39    |
| H(7C)  | 2756  | 1087  | 2020 | 39    |
| H(9)   | 2341  | 3727  | 1192 | 25    |
| H(10A) | 3824  | 3895  | 252  | 40    |
| H(10B) | 2394  | 2878  | 400  | 40    |
| H(10C) | 4168  | 2710  | 634  | 40    |
| H(11A) | 1324  | 5926  | 1045 | 43    |
| H(11B) | 600   | 4838  | 673  | 43    |
| H(11C) | 2010  | 5845  | 501  | 43    |
| H(12)  | 4016  | 6919  | 984  | 21    |
| H(14)  | 7642  | 4991  | 711  | 25    |
| H(15)  | 8652  | 4550  | -67  | 31    |
| H(16)  | 7301  | 5392  | -752 | 31    |
| H(17)  | 4984  | 6733  | -656 | 29    |
| H(18)  | 3991  | 7201  | 123  | 24    |
| H(20)  | 8689  | 7772  | 1781 | 26    |
| H(21)  | 9960  | 9839  | 1690 | 28    |
| H(23)  | 6677  | 10899 | 671  | 27    |
| H(24)  | 5384  | 8832  | 753  | 24    |
| H(25A) | 10021 | 11861 | 806  | 49    |
| H(25B) | 9989  | 12125 | 1381 | 49    |
| H(25C) | 8516  | 12639 | 1047 | 49    |
| H(2A)  | 3994  | 2645  | 1489 | 24    |
| H(4)   | 6330  | 6386  | 1622 | 25    |
